# Supplementary material
Source: PubMed Central journal article supplement (PMC8356247)
Supplement: NIHMS1717394-supplement-SI.pdf [file NIHMS1717394-supplement-SI.pdf]

## Supplemental Information

### **Tuning Composition of Polymer and Porous Silicon Composite Nanoparticles for Early Endosome Escape of Anti-miRNA Peptide Nucleic Acids**

Isom B. Kelly III<sup>1</sup>, R. Brock Fletcher<sup>1</sup>, James R. McBride, Sharon M. Weiss<sup>2</sup>, \*Craig L. Duvall<sup>1</sup>

<sup>1</sup>Department of Biomedical Engineering, Vanderbilt University, Nashville, TN, USA

<sup>2</sup>Department of Electrical Engineering and Computer Science, Vanderbilt University, Nashville, TN, USA

<sup>3</sup>Vanderbilt Institute of Nanoscale Science and Engineering, Vanderbilt University, Nashville, TN, US

\*Corresponding author e-mail address: [craig.duvall@vanderbilt.edu](mailto:craig.duvall@vanderbilt.edu)

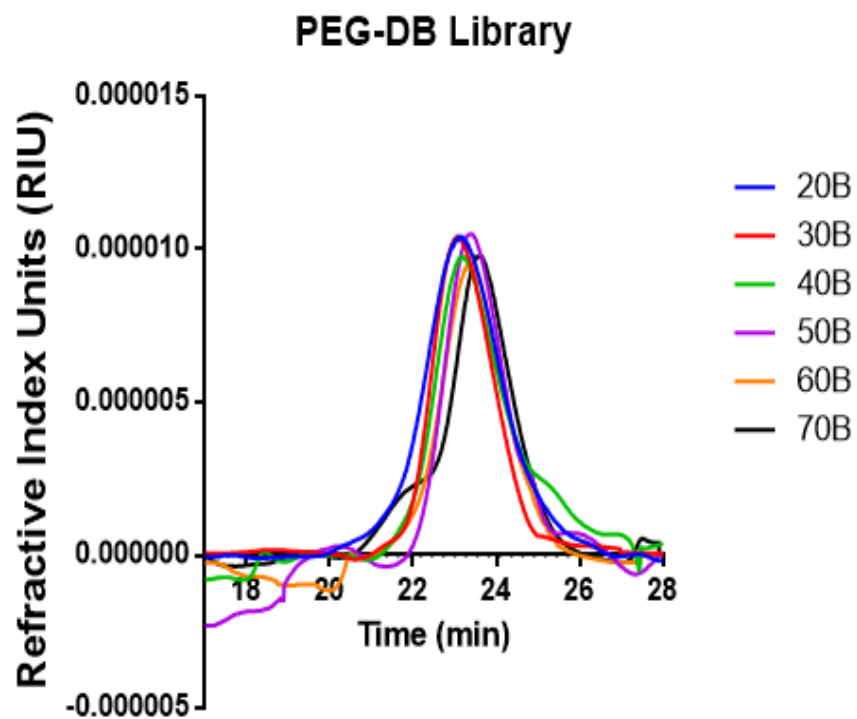

**Supplemental Figure 1.** Polymer GPC elution curves. These GPC spectra were acquired on an Agilent 1260 Infinity, with a mobile phase consisting of 0.1M Lithium Bromide (LiBr) in DMF.

A. \* Hydrogen bond angles are not representative of actual stereochemistry  
 Poly[(ethylene glycol)-*block*-[(2-(dimethylamino)ethyl methacrylate)-*co*-(butyl methacrylate)]]

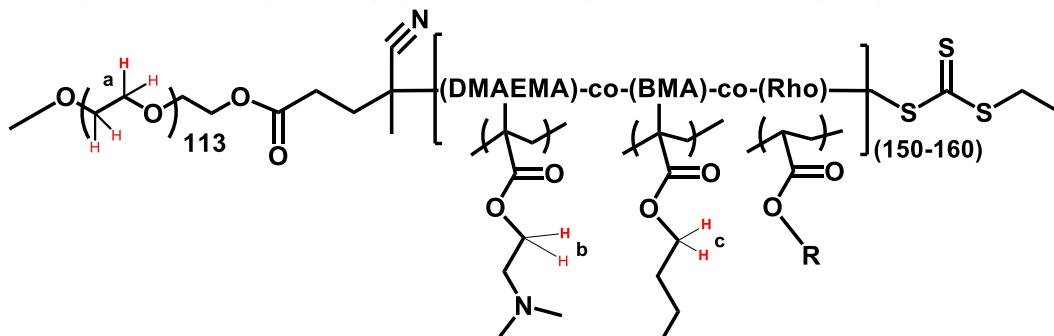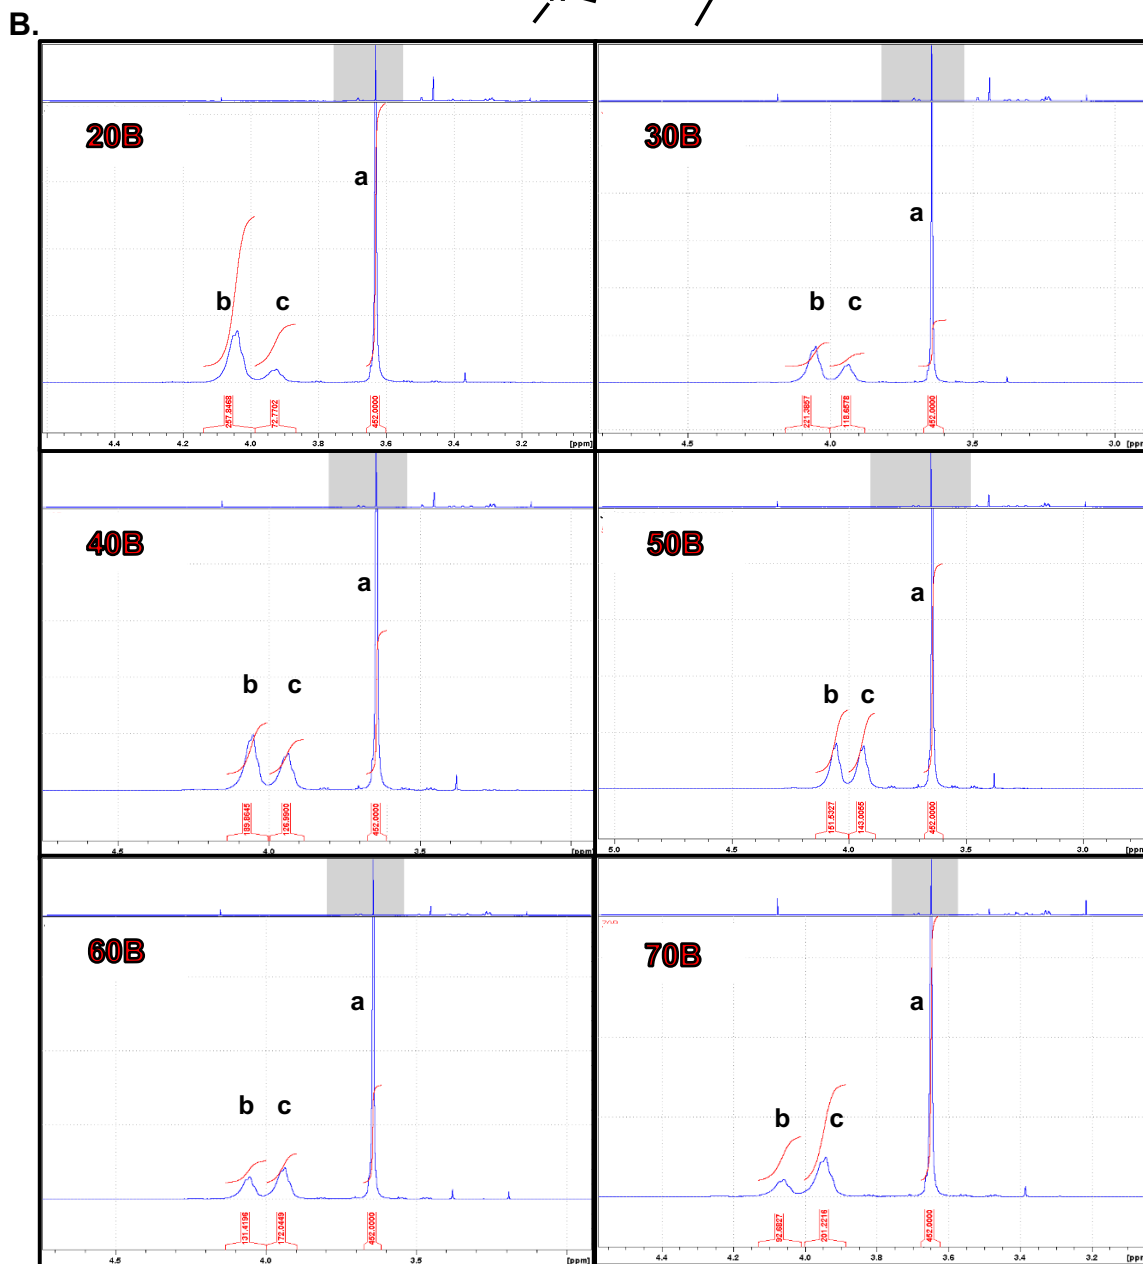

**Supplemental Figure 2. A)** Structure of PEG-DB. Red hydrogens on structure indicate the protons being measured in the  $^1\text{H}$ -nuclear magnetic resonance (NMR) below and their corresponding letter designations (a, b, and c); a= PEG protons, b= DMAEMA protons, and c= BMA protons. \*Rhodamine signal was too low to measure in these spectra. **B)**  $^1\text{H}$ -NMR spectroscopy for polymer library.

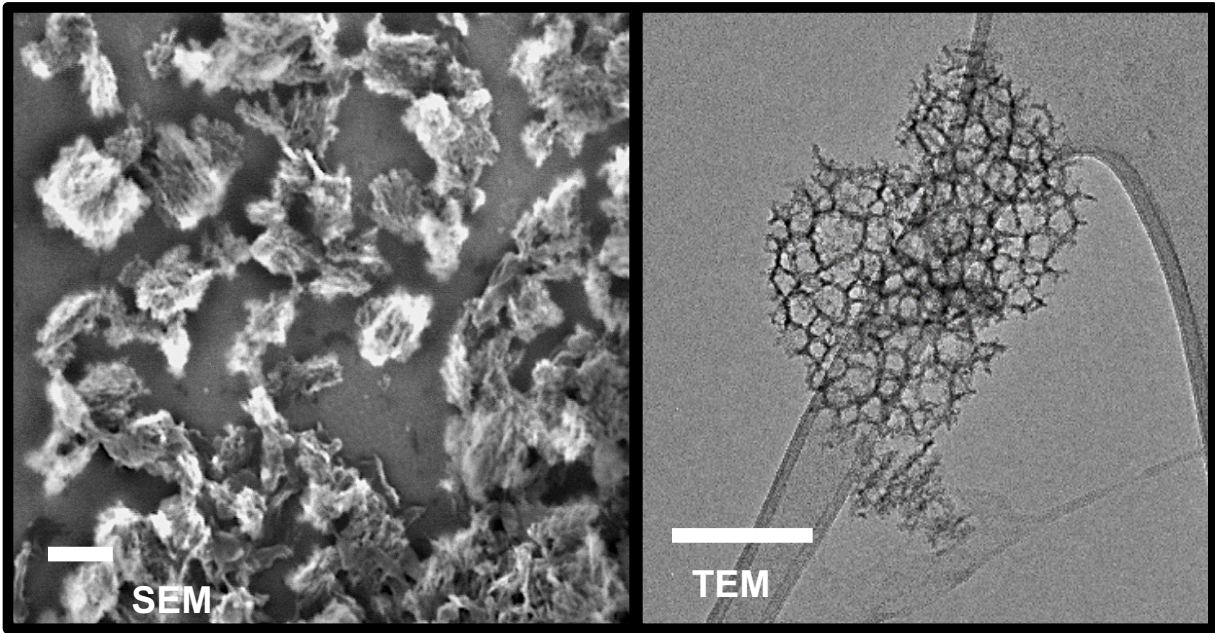

**Supplemental Figure 3.** The SEM image on the left shows the distribution of particles sizes and shapes. The sample was prepared by lyophilization of 0.33 mg/mL solution of PSNPs in biology grade water. The TEM image on the right shows the relevant pore size and porosity of the PSNPs. Scale bar for both images is 200 nm.

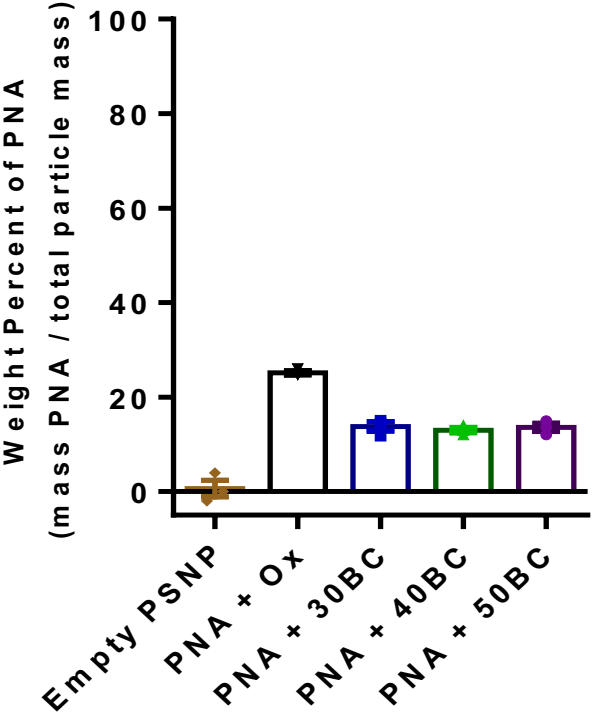

**Supplemental Figure 4.** PNA loading into porous silicon nanoparticles.

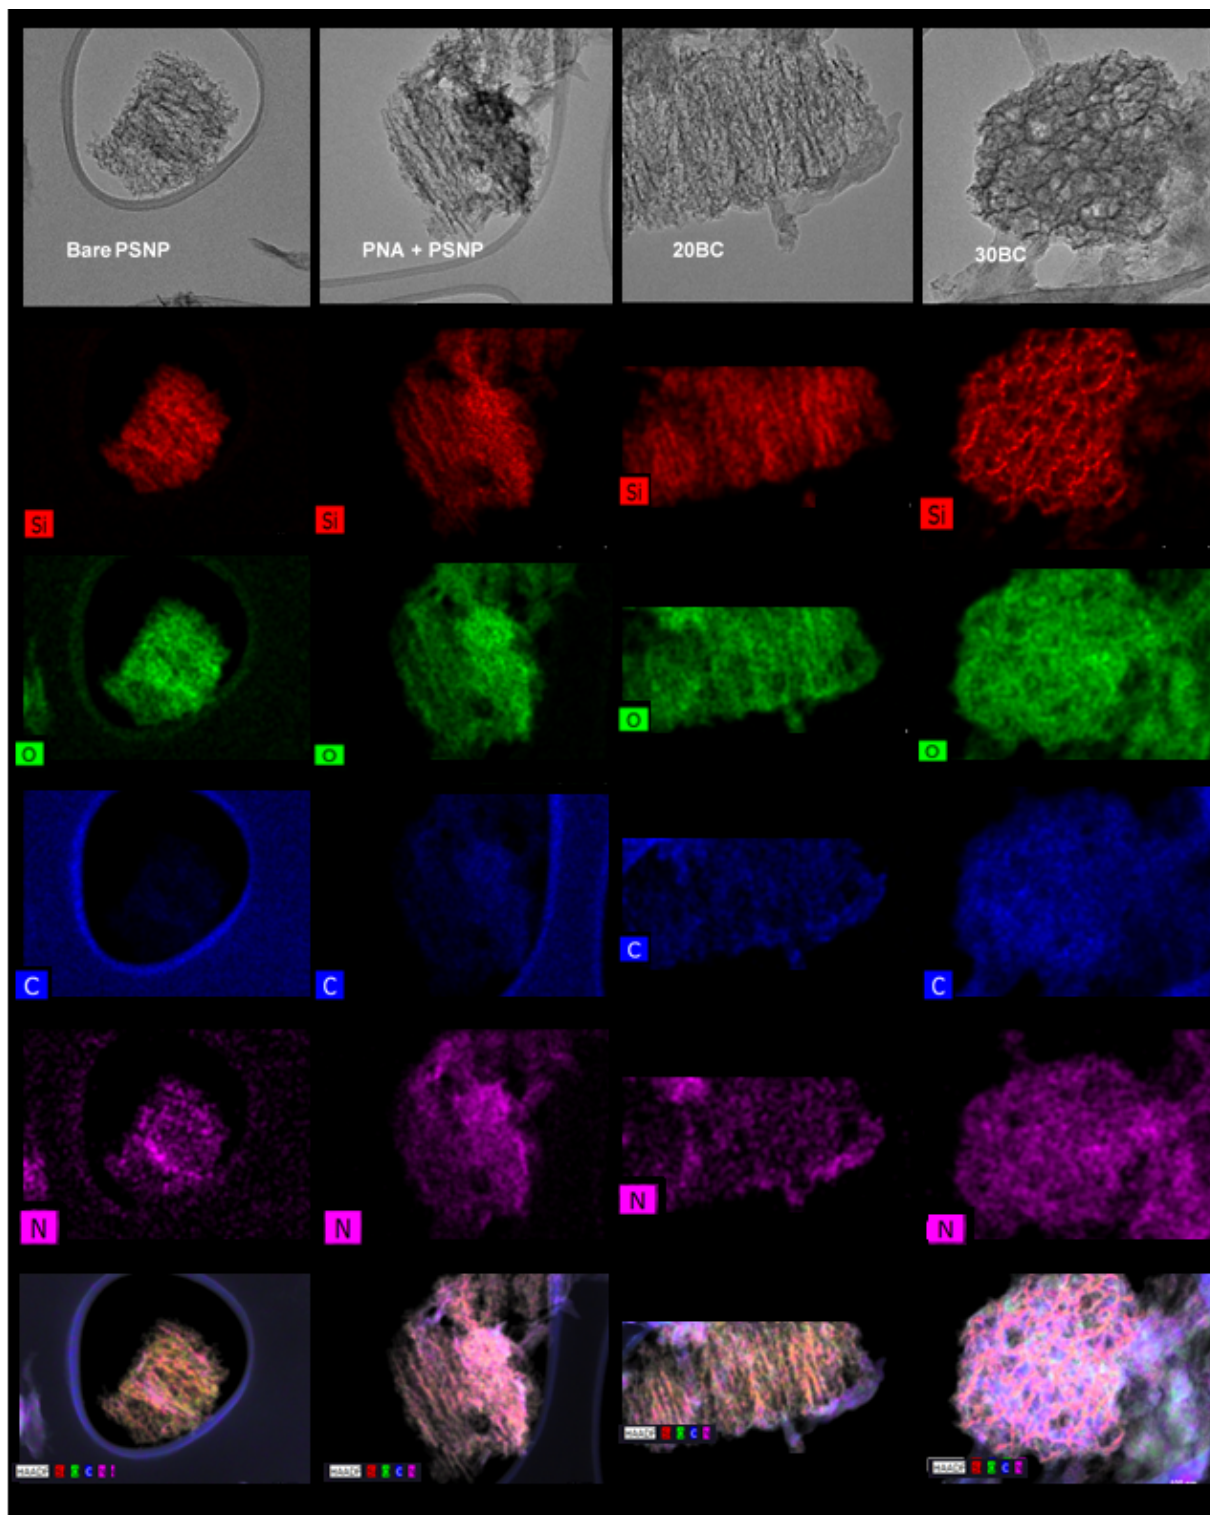

**Supplemental Figure 5A.** This image panel shows TEM with EDS elemental mapping for bare PSNP, PNA loaded PSNP, 20BC, and 30BC composites. The images illustrate the four most pertinent elements for these materials: Silicon (Si), Oxygen (O), Carbon (C), and Nitrogen (N). Silicon represents the silicon framework of the PSNPs, while the oxygen signal verifies the surface oxidation of the PSNPs. The carbon and nitrogen are used to visualize the PNA and polymer coating. The faint carbon signal seen in the oxidized particles is likely due to carbon contamination which is difficult to avoid in sample preparation. The width of each image is 400 nm.

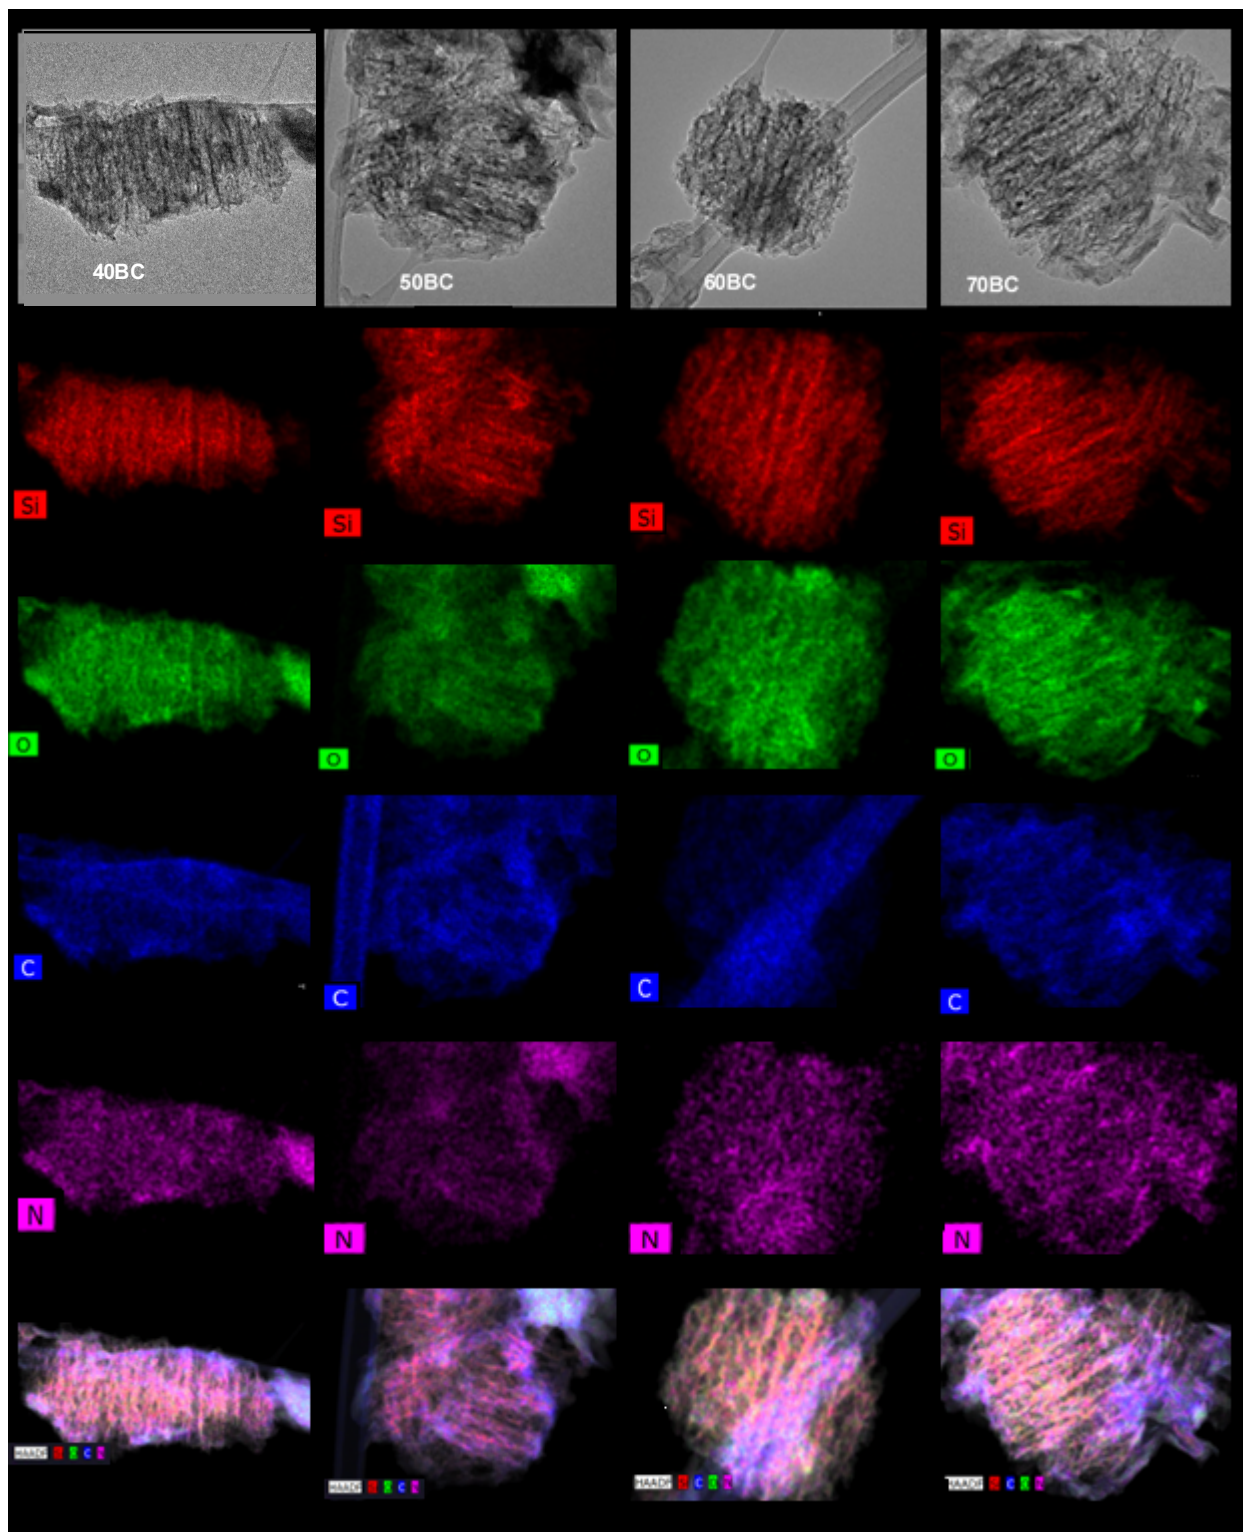

**Supplemental Figure 5B.** This image panel includes shows TEM with EDS elemental mapping for 40BC, 50BC, 60BC, and 70BC polymer-coated porous silicon composites. The images illustrate the four most pertinent elements for these materials: Silicon (Si), Oxygen (O), Carbon (C), and Nitrogen (N). Silicon represents the silicon framework of the PSNPs, while oxygen signal verifies the surface oxidation of the PSNPs. The faint carbon and nitrogen are used to visualize the PNA and polymer coating. Width of each image is 400 nm.

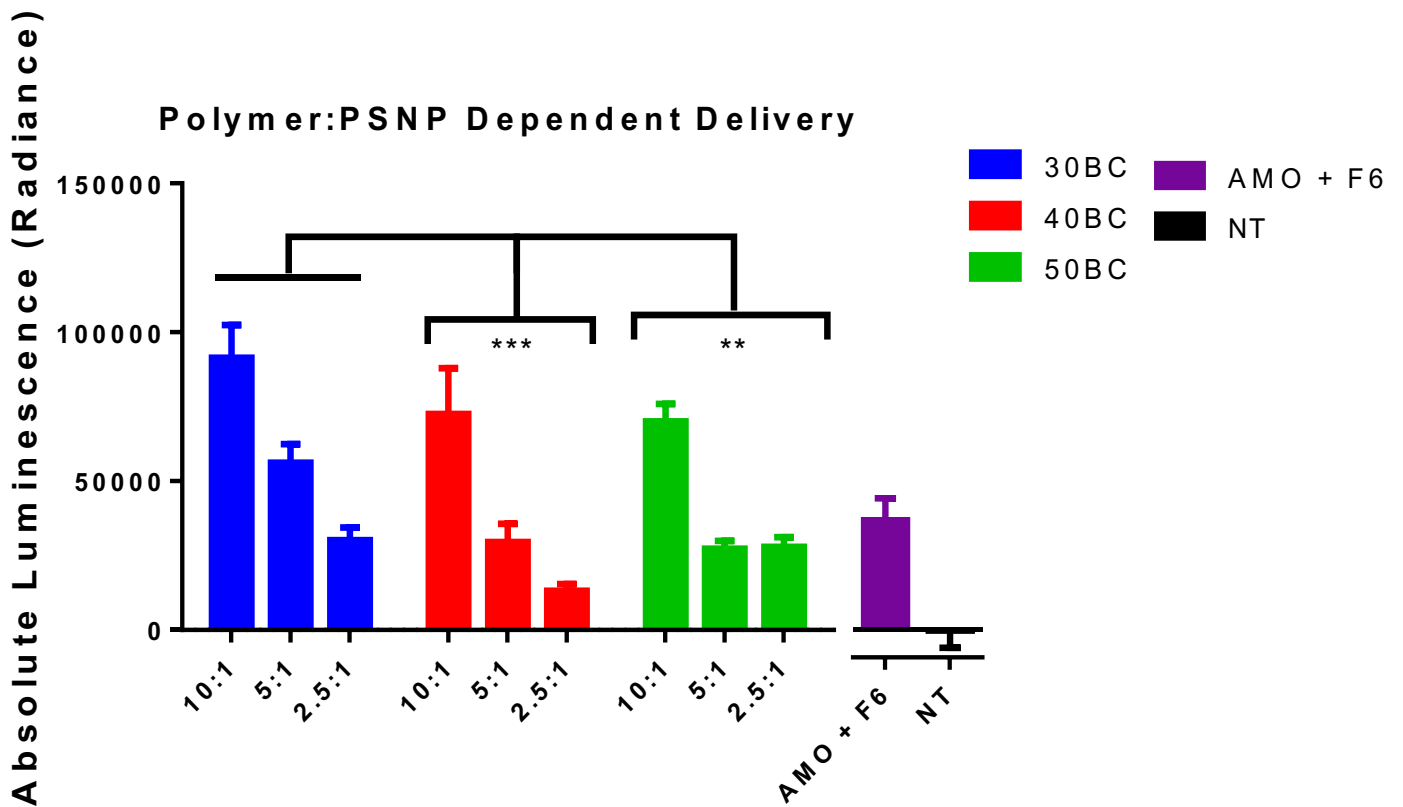

**Supplemental Figure 6.** Polymer:PSNP ratio dependent activity of anti-miR-122 PNA delivered via PSNP composites 30BC, 40B, and 50BC. The different ratios lead to varying mass amounts of total polymer coated which had pronounced effects on PNA activity.

### Serum Stability Statistical Analysis Tabular Results (Figure 4A Study)

|                                                                  |                       |                 |                 |                    |            |  |  |  |
|------------------------------------------------------------------|-----------------------|-----------------|-----------------|--------------------|------------|--|--|--|
| Table Analyzed                                                   | Stripping Kinetics    |                 |                 |                    |            |  |  |  |
| Two-way RM ANOVA                                                 | Matching : Across row |                 |                 |                    |            |  |  |  |
| Alpha                                                            | 0.05                  |                 |                 |                    |            |  |  |  |
| Source of Variation                                              | % of total variation  | P value         | P value summary | Significant?       |            |  |  |  |
| Interaction                                                      | 4.365                 | 0.0055          | **              | Yes                |            |  |  |  |
| Polymer Composition                                              | 16.11                 | 0.1518          | ns              | No                 |            |  |  |  |
| Time                                                             | 56.42                 | < 0.0001        | ****            | Yes                |            |  |  |  |
| Subjects (matching)                                              | 19.39                 | < 0.0001        | ****            | Yes                |            |  |  |  |
| ANOVA table                                                      | SS                    | DF              | MS              | F (DFn, DFd)       | P value    |  |  |  |
| Interaction                                                      | 641.4                 | 15              | 42.76           | F (15, 36) = 2.816 | P = 0.0055 |  |  |  |
| Polymer Composition                                              | 2368                  | 5               | 473.5           | F (5, 12) = 1.995  | P = 0.1518 |  |  |  |
| Time                                                             | 8290                  | 3               | 2763            | F (3, 36) = 182.0  | P < 0.0001 |  |  |  |
| Subjects (matching)                                              | 2849                  | 12              | 237.4           | F (12, 36) = 15.63 | P < 0.0001 |  |  |  |
| Residual                                                         | 546.7                 | 36              | 15.19           |                    |            |  |  |  |
| Number of missing values                                         | 0                     |                 |                 |                    |            |  |  |  |
| <b>Multiple Comparison</b>                                       |                       |                 |                 |                    |            |  |  |  |
| Within each column, compare rows (simple effects within columns) |                       |                 |                 |                    |            |  |  |  |
| Number of families                                               | 4                     |                 |                 |                    |            |  |  |  |
| Number of comparisons per family                                 | 15                    |                 |                 |                    |            |  |  |  |
| Alpha                                                            | 0.05                  |                 |                 |                    |            |  |  |  |
| Tukey's multiple comparisons test                                | Mean Diff.            | 95% CI of diff. | Significant?    | Summary            |            |  |  |  |
| 0 min                                                            |                       |                 |                 |                    |            |  |  |  |
| 20BC vs. 30BC                                                    | 2.667                 | -17.71 to 23.05 | No              | ns                 |            |  |  |  |
| 20BC vs. 40BC                                                    | 2                     | -18.38 to 22.38 | No              | ns                 |            |  |  |  |
| 20BC vs. 50BC                                                    | 3.667                 | -16.71 to 24.05 | No              | ns                 |            |  |  |  |
| 20BC vs. 60BC                                                    | 4.667                 | -15.71 to 25.05 | No              | ns                 |            |  |  |  |
| 20BC vs. 70BC                                                    | 5.333                 | -15.05 to 25.71 | No              | ns                 |            |  |  |  |
| 30BC vs. 40BC                                                    | -0.6667               | -21.05 to 19.71 | No              | ns                 |            |  |  |  |
| 30BC vs. 50BC                                                    | 1                     | -19.38 to 21.38 | No              | ns                 |            |  |  |  |
| 30BC vs. 60BC                                                    | 2                     | -18.38 to 22.38 | No              | ns                 |            |  |  |  |
| 30BC vs. 70BC                                                    | 2.667                 | -17.71 to 23.05 | No              | ns                 |            |  |  |  |
| 40BC vs. 50BC                                                    | 1.667                 | -18.71 to 22.05 | No              | ns                 |            |  |  |  |
| 40BC vs. 60BC                                                    | 2.667                 | -17.71 to 23.05 | No              | ns                 |            |  |  |  |
| 40BC vs. 70BC                                                    | 3.333                 | -17.05 to 23.71 | No              | ns                 |            |  |  |  |
| 50BC vs. 60BC                                                    | 1                     | -19.38 to 21.38 | No              | ns                 |            |  |  |  |



|               |        |                  |     |    |  |  |  |  |
|---------------|--------|------------------|-----|----|--|--|--|--|
| 50BC vs. 70BC | 1.667  | -18.71 to 22.05  | No  | ns |  |  |  |  |
| 60BC vs. 70BC | 0.6667 | -19.71 to 21.05  | No  | ns |  |  |  |  |
| <b>10 Min</b> |        |                  |     |    |  |  |  |  |
| 20BC vs. 30BC | 3.667  | -16.71 to 24.05  | No  | ns |  |  |  |  |
| 20BC vs. 40BC | 4.667  | -15.71 to 25.05  | No  | ns |  |  |  |  |
| 20BC vs. 50BC | 9.333  | -11.05 to 29.71  | No  | ns |  |  |  |  |
| 20BC vs. 60BC | 12.33  | -8.048 to 32.71  | No  | ns |  |  |  |  |
| 20BC vs. 70BC | 12.67  | -7.714 to 33.05  | No  | ns |  |  |  |  |
| 30BC vs. 40BC | 1      | -19.38 to 21.38  | No  | ns |  |  |  |  |
| 30BC vs. 50BC | 5.667  | -14.71 to 26.05  | No  | ns |  |  |  |  |
| 30BC vs. 60BC | 8.667  | -11.71 to 29.05  | No  | ns |  |  |  |  |
| 30BC vs. 70BC | 9      | -11.38 to 29.38  | No  | ns |  |  |  |  |
| 40BC vs. 50BC | 4.667  | -15.71 to 25.05  | No  | ns |  |  |  |  |
| 40BC vs. 60BC | 7.667  | -12.71 to 28.05  | No  | ns |  |  |  |  |
| 40BC vs. 70BC | 8      | -12.38 to 28.38  | No  | ns |  |  |  |  |
| 50BC vs. 60BC | 3      | -17.38 to 23.38  | No  | ns |  |  |  |  |
| 50BC vs. 70BC | 3.333  | -17.05 to 23.71  | No  | ns |  |  |  |  |
| 60BC vs. 70BC | 0.3333 | -20.05 to 20.71  | No  | ns |  |  |  |  |
| <b>40 Min</b> |        |                  |     |    |  |  |  |  |
| 20BC vs. 30BC | 3.333  | -17.05 to 23.71  | No  | ns |  |  |  |  |
| 20BC vs. 40BC | 7.333  | -13.05 to 27.71  | No  | ns |  |  |  |  |
| 20BC vs. 50BC | 12     | -8.381 to 32.38  | No  | ns |  |  |  |  |
| 20BC vs. 60BC | 17.33  | -3.048 to 37.71  | No  | ns |  |  |  |  |
| 20BC vs. 70BC | 20     | -0.3809 to 40.38 | No  | ns |  |  |  |  |
| 30BC vs. 40BC | 4      | -16.38 to 24.38  | No  | ns |  |  |  |  |
| 30BC vs. 50BC | 8.667  | -11.71 to 29.05  | No  | ns |  |  |  |  |
| 30BC vs. 60BC | 14     | -6.381 to 34.38  | No  | ns |  |  |  |  |
| 30BC vs. 70BC | 16.67  | -3.714 to 37.05  | No  | ns |  |  |  |  |
| 40BC vs. 50BC | 4.667  | -15.71 to 25.05  | No  | ns |  |  |  |  |
| 40BC vs. 60BC | 10     | -10.38 to 30.38  | No  | ns |  |  |  |  |
| 40BC vs. 70BC | 12.67  | -7.714 to 33.05  | No  | ns |  |  |  |  |
| 50BC vs. 60BC | 5.333  | -15.05 to 25.71  | No  | ns |  |  |  |  |
| 50BC vs. 70BC | 8      | -12.38 to 28.38  | No  | ns |  |  |  |  |
| 60BC vs. 70BC | 2.667  | -17.71 to 23.05  | No  | ns |  |  |  |  |
| <b>60 Min</b> |        |                  |     |    |  |  |  |  |
| 20BC vs. 30BC | 2      | -18.38 to 22.38  | No  | ns |  |  |  |  |
| 20BC vs. 40BC | 5.333  | -15.05 to 25.71  | No  | ns |  |  |  |  |
| 20BC vs. 50BC | 13     | -7.381 to 33.38  | No  | ns |  |  |  |  |
| 20BC vs. 60BC | 21     | 0.6191 to 41.38  | Yes | *  |  |  |  |  |
| 20BC vs. 70BC | 25.33  | 4.952 to 45.71   | Yes | ** |  |  |  |  |
| 30BC vs. 40BC | 3.333  | -17.05 to 23.71  | No  | ns |  |  |  |  |
| 30BC vs. 50BC | 11     | -9.381 to 31.38  | No  | ns |  |  |  |  |

|                     |               |                  |                   |                    |           |           |             |           |
|---------------------|---------------|------------------|-------------------|--------------------|-----------|-----------|-------------|-----------|
| 30BC vs. 60BC       | 19            | -1.381 to 39.38  | No                | ns                 |           |           |             |           |
| 30BC vs. 70BC       | 23.33         | 2.952 to 43.71   | Yes               | *                  |           |           |             |           |
| 40BC vs. 50BC       | 7.667         | -12.71 to 28.05  | No                | ns                 |           |           |             |           |
| 40BC vs. 60BC       | 15.67         | -4.714 to 36.05  | No                | ns                 |           |           |             |           |
| 40BC vs. 70BC       | 20            | -0.3809 to 40.38 | No                | ns                 |           |           |             |           |
| 50BC vs. 60BC       | 8             | -12.38 to 28.38  | No                | ns                 |           |           |             |           |
| 50BC vs. 70BC       | 12.33         | -8.048 to 32.71  | No                | ns                 |           |           |             |           |
| 60BC vs. 70BC       | 4.333         | -16.05 to 24.71  | No                | ns                 |           |           |             |           |
|                     |               |                  |                   |                    |           |           |             |           |
|                     |               |                  |                   |                    |           |           |             |           |
| <b>Test details</b> | <b>Mean 1</b> | <b>Mean 2</b>    | <b>Mean Diff.</b> | <b>SE of diff.</b> | <b>N1</b> | <b>N2</b> | <b>q</b>    | <b>DF</b> |
|                     |               |                  |                   |                    |           |           |             |           |
| <b>0 min</b>        |               |                  |                   |                    |           |           |             |           |
| 20BC vs. 30BC       | 14            | 11.33            | 2.667             | 6.867              | 3         | 3         | 0.5492      | 48        |
| 20BC vs. 40BC       | 14            | 12               | 2                 | 6.867              | 3         | 3         | 0.4119      | 48        |
| 20BC vs. 50BC       | 14            | 10.33            | 3.667             | 6.867              | 3         | 3         | 0.7551      | 48        |
| 20BC vs. 60BC       | 14            | 9.333            | 4.667             | 6.867              | 3         | 3         | 0.9611      | 48        |
| 20BC vs. 70BC       | 14            | 8.667            | 5.333             | 6.867              | 3         | 3         | 1.098       | 48        |
| 30BC vs. 40BC       | 11.33         | 12               | -0.6667           | 6.867              | 3         | 3         | 0.1373      | 48        |
| 30BC vs. 50BC       | 11.33         | 10.33            | 1                 | 6.867              | 3         | 3         | 0.2059      | 48        |
| 30BC vs. 60BC       | 11.33         | 9.333            | 2                 | 6.867              | 3         | 3         | 0.4119      | 48        |
| 30BC vs. 70BC       | 11.33         | 8.667            | 2.667             | 6.867              | 3         | 3         | 0.5492      | 48        |
| 40BC vs. 50BC       | 12            | 10.33            | 1.667             | 6.867              | 3         | 3         | 0.3432      | 48        |
| 40BC vs. 60BC       | 12            | 9.333            | 2.667             | 6.867              | 3         | 3         | 0.5492      | 48        |
| 40BC vs. 70BC       | 12            | 8.667            | 3.333             | 6.867              | 3         | 3         | 0.6865      | 48        |
| 50BC vs. 60BC       | 10.33         | 9.333            | 1                 | 6.867              | 3         | 3         | 0.2059      | 48        |
| 50BC vs. 70BC       | 10.33         | 8.667            | 1.667             | 6.867              | 3         | 3         | 0.3432      | 48        |
| 60BC vs. 70BC       | 9.333         | 8.667            | 0.6667            | 6.867              | 3         | 3         | 0.1373      | 48        |
|                     |               |                  |                   |                    |           |           |             |           |
| <b>10 Min</b>       |               |                  |                   |                    |           |           |             |           |
| 20BC vs. 30BC       | 29.33         | 25.67            | 3.667             | 6.867              | 3         | 3         | 0.7551      | 48        |
| 20BC vs. 40BC       | 29.33         | 24.67            | 4.667             | 6.867              | 3         | 3         | 0.9611      | 48        |
| 20BC vs. 50BC       | 29.33         | 20               | 9.333             | 6.867              | 3         | 3         | 1.922       | 48        |
| 20BC vs. 60BC       | 29.33         | 17               | 12.33             | 6.867              | 3         | 3         | 2.54        | 48        |
| 20BC vs. 70BC       | 29.33         | 16.67            | 12.67             | 6.867              | 3         | 3         | 2.609       | 48        |
| 30BC vs. 40BC       | 25.67         | 24.67            | 1                 | 6.867              | 3         | 3         | 0.2059      | 48        |
| 30BC vs. 50BC       | 25.67         | 20               | 5.667             | 6.867              | 3         | 3         | 1.167       | 48        |
| 30BC vs. 60BC       | 25.67         | 17               | 8.667             | 6.867              | 3         | 3         | 1.785       | 48        |
| 30BC vs. 70BC       | 25.67         | 16.67            | 9                 | 6.867              | 3         | 3         | 1.853       | 48        |
| 40BC vs. 50BC       | 24.67         | 20               | 4.667             | 6.867              | 3         | 3         | 0.9611      | 48        |
| 40BC vs. 60BC       | 24.67         | 17               | 7.667             | 6.867              | 3         | 3         | 1.579       | 48        |
| 40BC vs. 70BC       | 24.67         | 16.67            | 8                 | 6.867              | 3         | 3         | 1.648       | 48        |
| 50BC vs. 60BC       | 20            | 17               | 3                 | 6.867              | 3         | 3         | 0.6178      | 48        |
| 50BC vs. 70BC       | 20            | 16.67            | 3.333             | 6.867              | 3         | 3         | 0.6865      | 48        |
| 60BC vs. 70BC       | 17            | 16.67            | 0.3333            | 6.867              | 3         | 3         | 0.0686<br>5 | 48        |

|               |       |       |       |       |   |   |        |    |
|---------------|-------|-------|-------|-------|---|---|--------|----|
|               |       |       |       |       |   |   |        |    |
| <b>40 Min</b> |       |       |       |       |   |   |        |    |
| 20BC vs. 30BC | 42    | 38.67 | 3.333 | 6.867 | 3 | 3 | 0.6865 | 48 |
| 20BC vs. 40BC | 42    | 34.67 | 7.333 | 6.867 | 3 | 3 | 1.51   | 48 |
| 20BC vs. 50BC | 42    | 30    | 12    | 6.867 | 3 | 3 | 2.471  | 48 |
| 20BC vs. 60BC | 42    | 24.67 | 17.33 | 6.867 | 3 | 3 | 3.57   | 48 |
| 20BC vs. 70BC | 42    | 22    | 20    | 6.867 | 3 | 3 | 4.119  | 48 |
| 30BC vs. 40BC | 38.67 | 34.67 | 4     | 6.867 | 3 | 3 | 0.8238 | 48 |
| 30BC vs. 50BC | 38.67 | 30    | 8.667 | 6.867 | 3 | 3 | 1.785  | 48 |
| 30BC vs. 60BC | 38.67 | 24.67 | 14    | 6.867 | 3 | 3 | 2.883  | 48 |
| 30BC vs. 70BC | 38.67 | 22    | 16.67 | 6.867 | 3 | 3 | 3.432  | 48 |
| 40BC vs. 50BC | 34.67 | 30    | 4.667 | 6.867 | 3 | 3 | 0.9611 | 48 |
| 40BC vs. 60BC | 34.67 | 24.67 | 10    | 6.867 | 3 | 3 | 2.059  | 48 |
| 40BC vs. 70BC | 34.67 | 22    | 12.67 | 6.867 | 3 | 3 | 2.609  | 48 |
| 50BC vs. 60BC | 30    | 24.67 | 5.333 | 6.867 | 3 | 3 | 1.098  | 48 |
| 50BC vs. 70BC | 30    | 22    | 8     | 6.867 | 3 | 3 | 1.648  | 48 |
| 60BC vs. 70BC | 24.67 | 22    | 2.667 | 6.867 | 3 | 3 | 0.5492 | 48 |
|               |       |       |       |       |   |   |        |    |
| <b>60 Min</b> |       |       |       |       |   |   |        |    |
| 20BC vs. 30BC | 50.67 | 48.67 | 2     | 6.867 | 3 | 3 | 0.4119 | 48 |
| 20BC vs. 40BC | 50.67 | 45.33 | 5.333 | 6.867 | 3 | 3 | 1.098  | 48 |
| 20BC vs. 50BC | 50.67 | 37.67 | 13    | 6.867 | 3 | 3 | 2.677  | 48 |
| 20BC vs. 60BC | 50.67 | 29.67 | 21    | 6.867 | 3 | 3 | 4.325  | 48 |
| 20BC vs. 70BC | 50.67 | 25.33 | 25.33 | 6.867 | 3 | 3 | 5.217  | 48 |
| 30BC vs. 40BC | 48.67 | 45.33 | 3.333 | 6.867 | 3 | 3 | 0.6865 | 48 |
| 30BC vs. 50BC | 48.67 | 37.67 | 11    | 6.867 | 3 | 3 | 2.265  | 48 |
| 30BC vs. 60BC | 48.67 | 29.67 | 19    | 6.867 | 3 | 3 | 3.913  | 48 |
| 30BC vs. 70BC | 48.67 | 25.33 | 23.33 | 6.867 | 3 | 3 | 4.805  | 48 |
| 40BC vs. 50BC | 45.33 | 37.67 | 7.667 | 6.867 | 3 | 3 | 1.579  | 48 |
| 40BC vs. 60BC | 45.33 | 29.67 | 15.67 | 6.867 | 3 | 3 | 3.226  | 48 |
| 40BC vs. 70BC | 45.33 | 25.33 | 20    | 6.867 | 3 | 3 | 4.119  | 48 |
| 50BC vs. 60BC | 37.67 | 29.67 | 8     | 6.867 | 3 | 3 | 1.648  | 48 |
| 50BC vs. 70BC | 37.67 | 25.33 | 12.33 | 6.867 | 3 | 3 | 2.54   | 48 |
| 60BC vs. 70BC | 29.67 | 25.33 | 4.333 | 6.867 | 3 | 3 | 0.8924 | 48 |

**Supplemental Table 1.** Two-way RM ANOVA and Tukey's multiple comparisons results (Figure 4A Study), n=3. All calculations were made in Graphpad Prism

## pH Dependent Polymer Shedding Statistical Analysis Tabular Results (Figure 4B Study)

|                                                                         |                        |                 |                 |                     |            |  |  |  |  |
|-------------------------------------------------------------------------|------------------------|-----------------|-----------------|---------------------|------------|--|--|--|--|
| <b>Table Analyzed</b>                                                   | pH Dependent Stripping |                 |                 |                     |            |  |  |  |  |
| <b>Two-way RM ANOVA</b>                                                 | Matching: Across row   |                 |                 |                     |            |  |  |  |  |
| <b>Alpha</b>                                                            | 0.05                   |                 |                 |                     |            |  |  |  |  |
| <b>Source of Variation</b>                                              | % of total variation   | P value         | P value summary | Significant?        |            |  |  |  |  |
| <b>Interaction</b>                                                      | 2.567                  | 0.9379          | ns              | No                  |            |  |  |  |  |
| <b>pH</b>                                                               | 31.21                  | 0.0015          | **              | Yes                 |            |  |  |  |  |
| <b>Composition</b>                                                      | 44.03                  | < 0.0001        | ****            | Yes                 |            |  |  |  |  |
| <b>Subjects (matching)</b>                                              | 9.242                  | 0.0389          | *               | Yes                 |            |  |  |  |  |
| <b>ANOVA table</b>                                                      | SS                     | DF              | MS              | F (DFn, DFd)        | P value    |  |  |  |  |
| <b>Interaction</b>                                                      | 746.4                  | 15              | 49.76           | F (15, 36) = 0.4756 | P = 0.9379 |  |  |  |  |
| <b>pH</b>                                                               | 9071                   | 5               | 1814            | F (5, 12) = 8.103   | P = 0.0015 |  |  |  |  |
| <b>Composition</b>                                                      | 12799                  | 3               | 4266            | F (3, 36) = 40.78   | P < 0.0001 |  |  |  |  |
| <b>Subjects (matching)</b>                                              | 2687                   | 12              | 223.9           | F (12, 36) = 2.140  | P = 0.0389 |  |  |  |  |
| <b>Residual</b>                                                         | 3766                   | 36              | 104.6           |                     |            |  |  |  |  |
| <b>Number of missing values</b>                                         | 0                      |                 |                 |                     |            |  |  |  |  |
| <b>Multiple Comparisons</b>                                             |                        |                 |                 |                     |            |  |  |  |  |
| <b>Within each column, compare rows (simple effects within columns)</b> |                        |                 |                 |                     |            |  |  |  |  |
| <b>Number of families</b>                                               | 4                      |                 |                 |                     |            |  |  |  |  |
| <b>Number of comparisons per family</b>                                 | 15                     |                 |                 |                     |            |  |  |  |  |
| <b>Alpha</b>                                                            | 0.05                   |                 |                 |                     |            |  |  |  |  |
| <b>Tukey's multiple comparisons test</b>                                | Mean Diff.             | 95% CI of diff. | Significant?    | Summary             |            |  |  |  |  |
| <b>7.4</b>                                                              |                        |                 |                 |                     |            |  |  |  |  |
| <b>20BC vs. 30BC</b>                                                    | 11.37                  | -16.72 to 39.47 | No              | ns                  |            |  |  |  |  |
| <b>20BC vs. 40BC</b>                                                    | 31.51                  | 3.414 to 59.61  | Yes             | *                   |            |  |  |  |  |
| <b>20BC vs. 50BC</b>                                                    | 31.16                  | 3.060 to 59.25  | Yes             | *                   |            |  |  |  |  |
| <b>20BC vs. 60BC</b>                                                    | 31.88                  | 3.779 to 59.97  | Yes             | *                   |            |  |  |  |  |
| <b>20BC vs. 70BC</b>                                                    | 33.18                  | 5.080 to 61.27  | Yes             | *                   |            |  |  |  |  |
| <b>30BC vs. 40BC</b>                                                    | 20.14                  | -7.961 to 48.23 | No              | ns                  |            |  |  |  |  |
| <b>30BC vs. 50BC</b>                                                    | 19.78                  | -8.315 to 47.88 | No              | ns                  |            |  |  |  |  |
| <b>30BC vs. 60BC</b>                                                    | 20.5                   | -7.595 to 48.60 | No              | ns                  |            |  |  |  |  |
| <b>30BC vs. 70BC</b>                                                    | 21.8                   | -6.295 to 49.90 | No              | ns                  |            |  |  |  |  |
| <b>40BC vs. 50BC</b>                                                    | -0.354                 | -28.45 to 27.74 | No              | ns                  |            |  |  |  |  |
| <b>40BC vs. 60BC</b>                                                    | 0.3657                 | -27.73 to 28.46 | No              | ns                  |            |  |  |  |  |
| <b>40BC vs. 70BC</b>                                                    | 1.666                  | -26.43 to 29.76 | No              | ns                  |            |  |  |  |  |

|               |         |                 |     |    |  |  |  |  |
|---------------|---------|-----------------|-----|----|--|--|--|--|
| 50BC vs. 60BC | 0.7196  | -27.38 to 28.82 | No  | ns |  |  |  |  |
| 50BC vs. 70BC | 2.02    | -26.08 to 30.12 | No  | ns |  |  |  |  |
| 60BC vs. 70BC | 1.3     | -26.80 to 29.40 | No  | ns |  |  |  |  |
| 6.8           |         |                 |     |    |  |  |  |  |
| 20BC vs. 30BC | -6.095  | -34.19 to 22.00 | No  | ns |  |  |  |  |
| 20BC vs. 40BC | 12.01   | -16.09 to 40.11 | No  | ns |  |  |  |  |
| 20BC vs. 50BC | 22.32   | -5.777 to 50.42 | No  | ns |  |  |  |  |
| 20BC vs. 60BC | 24.42   | -3.677 to 52.52 | No  | ns |  |  |  |  |
| 20BC vs. 70BC | 23.91   | -4.182 to 52.01 | No  | ns |  |  |  |  |
| 30BC vs. 40BC | 18.11   | -9.992 to 46.20 | No  | ns |  |  |  |  |
| 30BC vs. 50BC | 28.41   | 0.3175 to 56.51 | Yes | *  |  |  |  |  |
| 30BC vs. 60BC | 30.51   | 2.417 to 58.61  | Yes | *  |  |  |  |  |
| 30BC vs. 70BC | 30.01   | 1.912 to 58.11  | Yes | *  |  |  |  |  |
| 40BC vs. 50BC | 10.31   | -17.79 to 38.41 | No  | ns |  |  |  |  |
| 40BC vs. 60BC | 12.41   | -15.69 to 40.51 | No  | ns |  |  |  |  |
| 40BC vs. 70BC | 11.9    | -16.19 to 40.00 | No  | ns |  |  |  |  |
| 50BC vs. 60BC | 2.1     | -26.00 to 30.20 | No  | ns |  |  |  |  |
| 50BC vs. 70BC | 1.595   | -26.50 to 29.69 | No  | ns |  |  |  |  |
| 60BC vs. 70BC | -0.5048 | -28.60 to 27.59 | No  | ns |  |  |  |  |
| 6.2           |         |                 |     |    |  |  |  |  |
| 20BC vs. 30BC | -9.224  | -37.32 to 18.87 | No  | ns |  |  |  |  |
| 20BC vs. 40BC | 11.82   | -16.27 to 39.92 | No  | ns |  |  |  |  |
| 20BC vs. 50BC | 14      | -14.10 to 42.10 | No  | ns |  |  |  |  |
| 20BC vs. 60BC | 21.4    | -6.696 to 49.50 | No  | ns |  |  |  |  |
| 20BC vs. 70BC | 17.31   | -10.78 to 45.41 | No  | ns |  |  |  |  |
| 30BC vs. 40BC | 21.05   | -7.049 to 49.14 | No  | ns |  |  |  |  |
| 30BC vs. 50BC | 23.22   | -4.875 to 51.32 | No  | ns |  |  |  |  |
| 30BC vs. 60BC | 30.62   | 2.528 to 58.72  | Yes | *  |  |  |  |  |
| 30BC vs. 70BC | 26.54   | -1.559 to 54.64 | No  | ns |  |  |  |  |
| 40BC vs. 50BC | 2.174   | -25.92 to 30.27 | No  | ns |  |  |  |  |
| 40BC vs. 60BC | 9.577   | -18.52 to 37.67 | No  | ns |  |  |  |  |
| 40BC vs. 70BC | 5.49    | -22.61 to 33.59 | No  | ns |  |  |  |  |
| 50BC vs. 60BC | 7.402   | -20.69 to 35.50 | No  | ns |  |  |  |  |
| 50BC vs. 70BC | 3.316   | -24.78 to 31.41 | No  | ns |  |  |  |  |
| 60BC vs. 70BC | -4.086  | -32.18 to 24.01 | No  | ns |  |  |  |  |
| 5.6           |         |                 |     |    |  |  |  |  |
| 20BC vs. 30BC | -8.693  | -36.79 to 19.40 | No  | ns |  |  |  |  |
| 20BC vs. 40BC | 15.29   | -12.81 to 43.39 | No  | ns |  |  |  |  |
| 20BC vs. 50BC | 21.96   | -6.137 to 50.06 | No  | ns |  |  |  |  |

|               |        |                  |            |             |    |    |         |     |
|---------------|--------|------------------|------------|-------------|----|----|---------|-----|
| 20BC vs. 60BC | 18.94  | -9.162 to 47.03  | No         | ns          |    |    |         |     |
| 20BC vs. 70BC | 17.16  | -10.94 to 45.26  | No         | ns          |    |    |         |     |
| 30BC vs. 40BC | 23.98  | -4.115 to 52.08  | No         | ns          |    |    |         |     |
| 30BC vs. 50BC | 30.65  | 2.555 to 58.75   | Yes        | *           |    |    |         |     |
| 30BC vs. 60BC | 27.63  | -0.4688 to 55.73 | No         | ns          |    |    |         |     |
| 30BC vs. 70BC | 25.85  | -2.243 to 53.95  | No         | ns          |    |    |         |     |
| 40BC vs. 50BC | 6.67   | -21.43 to 34.77  | No         | ns          |    |    |         |     |
| 40BC vs. 60BC | 3.646  | -24.45 to 31.74  | No         | ns          |    |    |         |     |
| 40BC vs. 70BC | 1.872  | -26.22 to 29.97  | No         | ns          |    |    |         |     |
| 50BC vs. 60BC | -3.024 | -31.12 to 25.07  | No         | ns          |    |    |         |     |
| 50BC vs. 70BC | -4.798 | -32.90 to 23.30  | No         | ns          |    |    |         |     |
| 60BC vs. 70BC | -1.774 | -29.87 to 26.32  | No         | ns          |    |    |         |     |
|               |        |                  |            |             |    |    |         |     |
|               |        |                  |            |             |    |    |         |     |
| Test details  | Mean 1 | Mean 2           | Mean Diff. | SE of diff. | N1 | N2 | q       | D F |
|               |        |                  |            |             |    |    |         |     |
| 7.4           |        |                  |            |             |    |    |         |     |
| 20BC vs. 30BC | 36.84  | 25.47            | 11.37      | 9.467       | 3  | 3  | 1.699   | 48  |
| 20BC vs. 40BC | 36.84  | 5.333            | 31.51      | 9.467       | 3  | 3  | 4.707   | 48  |
| 20BC vs. 50BC | 36.84  | 5.687            | 31.16      | 9.467       | 3  | 3  | 4.654   | 48  |
| 20BC vs. 60BC | 36.84  | 4.968            | 31.88      | 9.467       | 3  | 3  | 4.762   | 48  |
| 20BC vs. 70BC | 36.84  | 3.667            | 33.18      | 9.467       | 3  | 3  | 4.956   | 48  |
| 30BC vs. 40BC | 25.47  | 5.333            | 20.14      | 9.467       | 3  | 3  | 3.008   | 48  |
| 30BC vs. 50BC | 25.47  | 5.687            | 19.78      | 9.467       | 3  | 3  | 2.955   | 48  |
| 30BC vs. 60BC | 25.47  | 4.968            | 20.5       | 9.467       | 3  | 3  | 3.063   | 48  |
| 30BC vs. 70BC | 25.47  | 3.667            | 21.8       | 9.467       | 3  | 3  | 3.257   | 48  |
| 40BC vs. 50BC | 5.333  | 5.687            | -0.354     | 9.467       | 3  | 3  | 0.05287 | 48  |
| 40BC vs. 60BC | 5.333  | 4.968            | 0.3657     | 9.467       | 3  | 3  | 0.05463 | 48  |
| 40BC vs. 70BC | 5.333  | 3.667            | 1.666      | 9.467       | 3  | 3  | 0.2489  | 48  |
| 50BC vs. 60BC | 5.687  | 4.968            | 0.7196     | 9.467       | 3  | 3  | 0.1075  | 48  |
| 50BC vs. 70BC | 5.687  | 3.667            | 2.02       | 9.467       | 3  | 3  | 0.3018  | 48  |
| 60BC vs. 70BC | 4.968  | 3.667            | 1.3        | 9.467       | 3  | 3  | 0.1942  | 48  |
|               |        |                  |            |             |    |    |         |     |
| 6.8           |        |                  |            |             |    |    |         |     |
| 20BC vs. 30BC | 44.64  | 50.74            | -6.095     | 9.467       | 3  | 3  | 0.9104  | 48  |
| 20BC vs. 40BC | 44.64  | 32.63            | 12.01      | 9.467       | 3  | 3  | 1.794   | 48  |
| 20BC vs. 50BC | 44.64  | 22.32            | 22.32      | 9.467       | 3  | 3  | 3.334   | 48  |
| 20BC vs. 60BC | 44.64  | 20.22            | 24.42      | 9.467       | 3  | 3  | 3.648   | 48  |
| 20BC vs. 70BC | 44.64  | 20.73            | 23.91      | 9.467       | 3  | 3  | 3.572   | 48  |
| 30BC vs. 40BC | 50.74  | 32.63            | 18.11      | 9.467       | 3  | 3  | 2.705   | 48  |
| 30BC vs. 50BC | 50.74  | 22.32            | 28.41      | 9.467       | 3  | 3  | 4.245   | 48  |
| 30BC vs. 60BC | 50.74  | 20.22            | 30.51      | 9.467       | 3  | 3  | 4.558   | 48  |
| 30BC vs. 70BC | 50.74  | 20.73            | 30.01      | 9.467       | 3  | 3  | 4.483   | 48  |
| 40BC vs. 50BC | 32.63  | 22.32            | 10.31      | 9.467       | 3  | 3  | 1.54    | 48  |

|               |       |       |         |       |   |   |             |    |
|---------------|-------|-------|---------|-------|---|---|-------------|----|
| 40BC vs. 60BC | 32.63 | 20.22 | 12.41   | 9.467 | 3 | 3 | 1.854       | 48 |
| 40BC vs. 70BC | 32.63 | 20.73 | 11.9    | 9.467 | 3 | 3 | 1.778       | 48 |
| 50BC vs. 60BC | 22.32 | 20.22 | 2.1     | 9.467 | 3 | 3 | 0.313<br>6  | 48 |
| 50BC vs. 70BC | 22.32 | 20.73 | 1.595   | 9.467 | 3 | 3 | 0.238<br>2  | 48 |
| 60BC vs. 70BC | 20.22 | 20.73 | -0.5048 | 9.467 | 3 | 3 | 0.075<br>41 | 48 |
|               |       |       |         |       |   |   |             |    |
| 6.2           |       |       |         |       |   |   |             |    |
| 20BC vs. 30BC | 52.51 | 61.73 | -9.224  | 9.467 | 3 | 3 | 1.378       | 48 |
| 20BC vs. 40BC | 52.51 | 40.69 | 11.82   | 9.467 | 3 | 3 | 1.766       | 48 |
| 20BC vs. 50BC | 52.51 | 38.51 | 14      | 9.467 | 3 | 3 | 2.091       | 48 |
| 20BC vs. 60BC | 52.51 | 31.11 | 21.4    | 9.467 | 3 | 3 | 3.197       | 48 |
| 20BC vs. 70BC | 52.51 | 35.2  | 17.31   | 9.467 | 3 | 3 | 2.587       | 48 |
| 30BC vs. 40BC | 61.73 | 40.69 | 21.05   | 9.467 | 3 | 3 | 3.144       | 48 |
| 30BC vs. 50BC | 61.73 | 38.51 | 23.22   | 9.467 | 3 | 3 | 3.469       | 48 |
| 30BC vs. 60BC | 61.73 | 31.11 | 30.62   | 9.467 | 3 | 3 | 4.575       | 48 |
| 30BC vs. 70BC | 61.73 | 35.2  | 26.54   | 9.467 | 3 | 3 | 3.964       | 48 |
| 40BC vs. 50BC | 40.69 | 38.51 | 2.174   | 9.467 | 3 | 3 | 0.324<br>8  | 48 |
| 40BC vs. 60BC | 40.69 | 31.11 | 9.577   | 9.467 | 3 | 3 | 1.431       | 48 |
| 40BC vs. 70BC | 40.69 | 35.2  | 5.49    | 9.467 | 3 | 3 | 0.820<br>2  | 48 |
| 50BC vs. 60BC | 38.51 | 31.11 | 7.402   | 9.467 | 3 | 3 | 1.106       | 48 |
| 50BC vs. 70BC | 38.51 | 35.2  | 3.316   | 9.467 | 3 | 3 | 0.495<br>3  | 48 |
| 60BC vs. 70BC | 31.11 | 35.2  | -4.086  | 9.467 | 3 | 3 | 0.610<br>4  | 48 |
|               |       |       |         |       |   |   |             |    |
| 5.6           |       |       |         |       |   |   |             |    |
| 20BC vs. 30BC | 59.16 | 67.85 | -8.693  | 9.467 | 3 | 3 | 1.299       | 48 |
| 20BC vs. 40BC | 59.16 | 43.87 | 15.29   | 9.467 | 3 | 3 | 2.284       | 48 |
| 20BC vs. 50BC | 59.16 | 37.2  | 21.96   | 9.467 | 3 | 3 | 3.28        | 48 |
| 20BC vs. 60BC | 59.16 | 40.23 | 18.94   | 9.467 | 3 | 3 | 2.829       | 48 |
| 20BC vs. 70BC | 59.16 | 42    | 17.16   | 9.467 | 3 | 3 | 2.564       | 48 |
| 30BC vs. 40BC | 67.85 | 43.87 | 23.98   | 9.467 | 3 | 3 | 3.583       | 48 |
| 30BC vs. 50BC | 67.85 | 37.2  | 30.65   | 9.467 | 3 | 3 | 4.579       | 48 |
| 30BC vs. 60BC | 67.85 | 40.23 | 27.63   | 9.467 | 3 | 3 | 4.127       | 48 |
| 30BC vs. 70BC | 67.85 | 42    | 25.85   | 9.467 | 3 | 3 | 3.862       | 48 |
| 40BC vs. 50BC | 43.87 | 37.2  | 6.67    | 9.467 | 3 | 3 | 0.996<br>5  | 48 |
| 40BC vs. 60BC | 43.87 | 40.23 | 3.646   | 9.467 | 3 | 3 | 0.544<br>7  | 48 |
| 40BC vs. 70BC | 43.87 | 42    | 1.872   | 9.467 | 3 | 3 | 0.279<br>7  | 48 |
| 50BC vs. 60BC | 37.2  | 40.23 | -3.024  | 9.467 | 3 | 3 | 0.451<br>8  | 48 |
| 50BC vs. 70BC | 37.2  | 42    | -4.798  | 9.467 | 3 | 3 | 0.716<br>8  | 48 |
| 60BC vs. 70BC | 40.23 | 42    | -1.774  | 9.467 | 3 | 3 | 0.265       | 48 |

**Supplemental Table 2.** Two-way RM ANOVA and Tukey's multiple comparisons results (Figure 4B Study), n=3. All calculations were made in Graphpad Prism

## Red Blood Cell Hemolysis Assay Statistical Analysis Tabular Results (Figure 4C Study)

|                                                                         |                           |                  |                 |                     |            |
|-------------------------------------------------------------------------|---------------------------|------------------|-----------------|---------------------|------------|
| <b>Table Analyzed</b>                                                   | Hemolysis Library pH in X |                  |                 |                     |            |
| <b>Two-way RM ANOVA</b>                                                 | Matching: Across row      |                  |                 |                     |            |
| <b>Alpha</b>                                                            | 0.05                      |                  |                 |                     |            |
| <b>Source of Variation</b>                                              | % of total variation      | P value          | P value summary | Significant?        |            |
| <b>Interaction</b>                                                      | 12.31                     | < 0.0001         | ****            | Yes                 |            |
| <b>Composition</b>                                                      | 21.73                     | < 0.0001         | ****            | Yes                 |            |
| <b>pH</b>                                                               | 63.24                     | < 0.0001         | ****            | Yes                 |            |
| <b>Subjects (matching)</b>                                              | 0.5639                    | 0.7441           | ns              | No                  |            |
| <b>ANOVA table</b>                                                      | SS                        | DF               | MS              | F (DFn, DFd)        | P value    |
| <b>Interaction</b>                                                      | 15612                     | 33               | 473.1           | F (33, 72) = 12.44  | P < 0.0001 |
| <b>Composition</b>                                                      | 27574                     | 11               | 2507            | F (11, 24) = 84.09  | P < 0.0001 |
| <b>pH</b>                                                               | 80232                     | 3                | 26744           | F (3, 72) = 703.1   | P < 0.0001 |
| <b>Subjects (matching)</b>                                              | 715.4                     | 24               | 29.81           | F (24, 72) = 0.7837 | P = 0.7441 |
| <b>Residual</b>                                                         | 2739                      | 72               | 38.04           |                     |            |
| <b>Number of missing values</b>                                         | 0                         |                  |                 |                     |            |
| <b>Multiple Comparisons</b>                                             |                           |                  |                 |                     |            |
| <b>Within each column, compare rows (simple effects within columns)</b> |                           |                  |                 |                     |            |
| <b>Number of families</b>                                               | 4                         |                  |                 |                     |            |
| <b>Number of comparisons per family</b>                                 | 66                        |                  |                 |                     |            |
| <b>Alpha</b>                                                            | 0.05                      |                  |                 |                     |            |
| <b>Tukey's multiple comparisons test</b>                                | Mean Diff.                | 95% CI of diff.  | Significant?    | Summary             |            |
| <b>7.4</b>                                                              |                           |                  |                 |                     |            |
| <b>20BC vs. 20B</b>                                                     | -6.333                    | -22.74 to 10.07  | No              | ns                  |            |
| <b>20BC vs. 30BC</b>                                                    | -10                       | -26.41 to 6.408  | No              | ns                  |            |
| <b>20BC vs. 30B</b>                                                     | -23.67                    | -40.07 to -7.259 | Yes             | ***                 |            |
| <b>20BC vs. 40BC</b>                                                    | 2                         | -14.41 to 18.41  | No              | ns                  |            |
| <b>20BC vs. 40B</b>                                                     | -9.667                    | -26.07 to 6.741  | No              | ns                  |            |
| <b>20BC vs. 50BC</b>                                                    | 7.683                     | -8.725 to 24.09  | No              | ns                  |            |
| <b>20BC vs. 50B</b>                                                     | -2                        | -18.41 to 14.41  | No              | ns                  |            |
| <b>20BC vs. 60BC</b>                                                    | 9                         | -7.408 to 25.41  | No              | ns                  |            |
| <b>20BC vs. 60B</b>                                                     | -4.667                    | -21.07 to 11.74  | No              | ns                  |            |
| <b>20BC vs. 70BC</b>                                                    | 6                         | -10.41 to 22.41  | No              | ns                  |            |
| <b>20BC vs. 70B</b>                                                     | -2                        | -18.41 to 14.41  | No              | ns                  |            |
| <b>20B vs. 30BC</b>                                                     | -3.667                    | -20.07 to 12.74  | No              | ns                  |            |



|               |        |                   |     |      |  |  |  |  |
|---------------|--------|-------------------|-----|------|--|--|--|--|
| 20B vs. 30B   | -17.33 | -33.74 to -0.9253 | Yes | *    |  |  |  |  |
| 20B vs. 40BC  | 8.333  | -8.075 to 24.74   | No  | ns   |  |  |  |  |
| 20B vs. 40B   | -3.333 | -19.74 to 13.07   | No  | ns   |  |  |  |  |
| 20B vs. 50BC  | 14.02  | -2.392 to 30.42   | No  | ns   |  |  |  |  |
| 20B vs. 50B   | 4.333  | -12.07 to 20.74   | No  | ns   |  |  |  |  |
| 20B vs. 60BC  | 15.33  | -1.075 to 31.74   | No  | ns   |  |  |  |  |
| 20B vs. 60B   | 1.667  | -14.74 to 18.07   | No  | ns   |  |  |  |  |
| 20B vs. 70BC  | 12.33  | -4.075 to 28.74   | No  | ns   |  |  |  |  |
| 20B vs. 70B   | 4.333  | -12.07 to 20.74   | No  | ns   |  |  |  |  |
| 30BC vs. 30B  | -13.67 | -30.07 to 2.741   | No  | ns   |  |  |  |  |
| 30BC vs. 40BC | 12     | -4.408 to 28.41   | No  | ns   |  |  |  |  |
| 30BC vs. 40B  | 0.3333 | -16.07 to 16.74   | No  | ns   |  |  |  |  |
| 30BC vs. 50BC | 17.68  | 1.275 to 34.09    | Yes | *    |  |  |  |  |
| 30BC vs. 50B  | 8      | -8.408 to 24.41   | No  | ns   |  |  |  |  |
| 30BC vs. 60BC | 19     | 2.592 to 35.41    | Yes | **   |  |  |  |  |
| 30BC vs. 60B  | 5.333  | -11.07 to 21.74   | No  | ns   |  |  |  |  |
| 30BC vs. 70BC | 16     | -0.4080 to 32.41  | No  | ns   |  |  |  |  |
| 30BC vs. 70B  | 8      | -8.408 to 24.41   | No  | ns   |  |  |  |  |
| 30B vs. 40BC  | 25.67  | 9.259 to 42.07    | Yes | **** |  |  |  |  |
| 30B vs. 40B   | 14     | -2.408 to 30.41   | No  | ns   |  |  |  |  |
| 30B vs. 50BC  | 31.35  | 14.94 to 47.76    | Yes | **** |  |  |  |  |
| 30B vs. 50B   | 21.67  | 5.259 to 38.07    | Yes | **   |  |  |  |  |
| 30B vs. 60BC  | 32.67  | 16.26 to 49.07    | Yes | **** |  |  |  |  |
| 30B vs. 60B   | 19     | 2.592 to 35.41    | Yes | **   |  |  |  |  |
| 30B vs. 70BC  | 29.67  | 13.26 to 46.07    | Yes | **** |  |  |  |  |
| 30B vs. 70B   | 21.67  | 5.259 to 38.07    | Yes | **   |  |  |  |  |
| 40BC vs. 40B  | -11.67 | -28.07 to 4.741   | No  | ns   |  |  |  |  |
| 40BC vs. 50BC | 5.683  | -10.73 to 22.09   | No  | ns   |  |  |  |  |
| 40BC vs. 50B  | -4     | -20.41 to 12.41   | No  | ns   |  |  |  |  |
| 40BC vs. 60BC | 7      | -9.408 to 23.41   | No  | ns   |  |  |  |  |
| 40BC vs. 60B  | -6.667 | -23.07 to 9.741   | No  | ns   |  |  |  |  |
| 40BC vs. 70BC | 4      | -12.41 to 20.41   | No  | ns   |  |  |  |  |
| 40BC vs. 70B  | -4     | -20.41 to 12.41   | No  | ns   |  |  |  |  |
| 40B vs. 50BC  | 17.35  | 0.9417 to 33.76   | Yes | *    |  |  |  |  |
| 40B vs. 50B   | 7.667  | -8.741 to 24.07   | No  | ns   |  |  |  |  |
| 40B vs. 60BC  | 18.67  | 2.259 to 35.07    | Yes | *    |  |  |  |  |
| 40B vs. 60B   | 5      | -11.41 to 21.41   | No  | ns   |  |  |  |  |
| 40B vs. 70BC  | 15.67  | -0.7414 to 32.07  | No  | ns   |  |  |  |  |
| 40B vs. 70B   | 7.667  | -8.741 to 24.07   | No  | ns   |  |  |  |  |
| 50BC vs. 50B  | -9.683 | -26.09 to 6.725   | No  | ns   |  |  |  |  |
| 50BC vs. 60BC | 1.317  | -15.09 to 17.73   | No  | ns   |  |  |  |  |
| 50BC vs. 60B  | -12.35 | -28.76 to 4.058   | No  | ns   |  |  |  |  |
| 50BC vs. 70BC | -1.683 | -18.09 to 14.73   | No  | ns   |  |  |  |  |

|               |        |                   |     |      |  |  |  |  |
|---------------|--------|-------------------|-----|------|--|--|--|--|
| 50BC vs. 70B  | -9.683 | -26.09 to 6.725   | No  | ns   |  |  |  |  |
| 50B vs. 60BC  | 11     | -5.408 to 27.41   | No  | ns   |  |  |  |  |
| 50B vs. 60B   | -2.667 | -19.07 to 13.74   | No  | ns   |  |  |  |  |
| 50B vs. 70BC  | 8      | -8.408 to 24.41   | No  | ns   |  |  |  |  |
| 50B vs. 70B   | 0      | -16.41 to 16.41   | No  | ns   |  |  |  |  |
| 60BC vs. 60B  | -13.67 | -30.07 to 2.741   | No  | ns   |  |  |  |  |
| 60BC vs. 70BC | -3     | -19.41 to 13.41   | No  | ns   |  |  |  |  |
| 60BC vs. 70B  | -11    | -27.41 to 5.408   | No  | ns   |  |  |  |  |
| 60B vs. 70BC  | 10.67  | -5.741 to 27.07   | No  | ns   |  |  |  |  |
| 60B vs. 70B   | 2.667  | -13.74 to 19.07   | No  | ns   |  |  |  |  |
| 70BC vs. 70B  | -8     | -24.41 to 8.408   | No  | ns   |  |  |  |  |
| 6.8           |        |                   |     |      |  |  |  |  |
| 20BC vs. 20B  | 8.667  | -7.741 to 25.07   | No  | ns   |  |  |  |  |
| 20BC vs. 30BC | -10    | -26.41 to 6.408   | No  | ns   |  |  |  |  |
| 20BC vs. 30B  | -26.33 | -42.74 to -9.925  | Yes | **** |  |  |  |  |
| 20BC vs. 40BC | 2      | -14.41 to 18.41   | No  | ns   |  |  |  |  |
| 20BC vs. 40B  | -14    | -30.41 to 2.408   | No  | ns   |  |  |  |  |
| 20BC vs. 50BC | 18     | 1.592 to 34.41    | Yes | *    |  |  |  |  |
| 20BC vs. 50B  | -24.33 | -40.74 to -7.925  | Yes | ***  |  |  |  |  |
| 20BC vs. 60BC | 24     | 7.592 to 40.41    | Yes | ***  |  |  |  |  |
| 20BC vs. 60B  | 16.33  | -0.07471 to 32.74 | No  | ns   |  |  |  |  |
| 20BC vs. 70BC | 26     | 9.592 to 42.41    | Yes | **** |  |  |  |  |
| 20BC vs. 70B  | 19.33  | 2.925 to 35.74    | Yes | **   |  |  |  |  |
| 20B vs. 30BC  | -18.67 | -35.07 to -2.259  | Yes | *    |  |  |  |  |
| 20B vs. 30B   | -35    | -51.41 to -18.59  | Yes | **** |  |  |  |  |
| 20B vs. 40BC  | -6.667 | -23.07 to 9.741   | No  | ns   |  |  |  |  |
| 20B vs. 40B   | -22.67 | -39.07 to -6.259  | Yes | ***  |  |  |  |  |
| 20B vs. 50BC  | 9.333  | -7.075 to 25.74   | No  | ns   |  |  |  |  |
| 20B vs. 50B   | -33    | -49.41 to -16.59  | Yes | **** |  |  |  |  |
| 20B vs. 60BC  | 15.33  | -1.075 to 31.74   | No  | ns   |  |  |  |  |
| 20B vs. 60B   | 7.667  | -8.741 to 24.07   | No  | ns   |  |  |  |  |
| 20B vs. 70BC  | 17.33  | 0.9253 to 33.74   | Yes | *    |  |  |  |  |
| 20B vs. 70B   | 10.67  | -5.741 to 27.07   | No  | ns   |  |  |  |  |
| 30BC vs. 30B  | -16.33 | -32.74 to 0.07471 | No  | ns   |  |  |  |  |
| 30BC vs. 40BC | 12     | -4.408 to 28.41   | No  | ns   |  |  |  |  |
| 30BC vs. 40B  | -4     | -20.41 to 12.41   | No  | ns   |  |  |  |  |
| 30BC vs. 50BC | 28     | 11.59 to 44.41    | Yes | **** |  |  |  |  |
| 30BC vs. 50B  | -14.33 | -30.74 to 2.075   | No  | ns   |  |  |  |  |
| 30BC vs. 60BC | 34     | 17.59 to 50.41    | Yes | **** |  |  |  |  |
| 30BC vs. 60B  | 26.33  | 9.925 to 42.74    | Yes | **** |  |  |  |  |
| 30BC vs. 70BC | 36     | 19.59 to 52.41    | Yes | **** |  |  |  |  |
| 30BC vs. 70B  | 29.33  | 12.93 to 45.74    | Yes | **** |  |  |  |  |

|               |        |                   |     |      |  |  |  |  |
|---------------|--------|-------------------|-----|------|--|--|--|--|
| 30B vs. 40BC  | 28.33  | 11.93 to 44.74    | Yes | **** |  |  |  |  |
| 30B vs. 40B   | 12.33  | -4.075 to 28.74   | No  | ns   |  |  |  |  |
| 30B vs. 50BC  | 44.33  | 27.93 to 60.74    | Yes | **** |  |  |  |  |
| 30B vs. 50B   | 2      | -14.41 to 18.41   | No  | ns   |  |  |  |  |
| 30B vs. 60BC  | 50.33  | 33.93 to 66.74    | Yes | **** |  |  |  |  |
| 30B vs. 60B   | 42.67  | 26.26 to 59.07    | Yes | **** |  |  |  |  |
| 30B vs. 70BC  | 52.33  | 35.93 to 68.74    | Yes | **** |  |  |  |  |
| 30B vs. 70B   | 45.67  | 29.26 to 62.07    | Yes | **** |  |  |  |  |
| 40BC vs. 40B  | -16    | -32.41 to 0.4080  | No  | ns   |  |  |  |  |
| 40BC vs. 50BC | 16     | -0.4080 to 32.41  | No  | ns   |  |  |  |  |
| 40BC vs. 50B  | -26.33 | -42.74 to -9.925  | Yes | **** |  |  |  |  |
| 40BC vs. 60BC | 22     | 5.592 to 38.41    | Yes | **   |  |  |  |  |
| 40BC vs. 60B  | 14.33  | -2.075 to 30.74   | No  | ns   |  |  |  |  |
| 40BC vs. 70BC | 24     | 7.592 to 40.41    | Yes | ***  |  |  |  |  |
| 40BC vs. 70B  | 17.33  | 0.9253 to 33.74   | Yes | *    |  |  |  |  |
| 40B vs. 50BC  | 32     | 15.59 to 48.41    | Yes | **** |  |  |  |  |
| 40B vs. 50B   | -10.33 | -26.74 to 6.075   | No  | ns   |  |  |  |  |
| 40B vs. 60BC  | 38     | 21.59 to 54.41    | Yes | **** |  |  |  |  |
| 40B vs. 60B   | 30.33  | 13.93 to 46.74    | Yes | **** |  |  |  |  |
| 40B vs. 70BC  | 40     | 23.59 to 56.41    | Yes | **** |  |  |  |  |
| 40B vs. 70B   | 33.33  | 16.93 to 49.74    | Yes | **** |  |  |  |  |
| 50BC vs. 50B  | -42.33 | -58.74 to -25.93  | Yes | **** |  |  |  |  |
| 50BC vs. 60BC | 6      | -10.41 to 22.41   | No  | ns   |  |  |  |  |
| 50BC vs. 60B  | -1.667 | -18.07 to 14.74   | No  | ns   |  |  |  |  |
| 50BC vs. 70BC | 8      | -8.408 to 24.41   | No  | ns   |  |  |  |  |
| 50BC vs. 70B  | 1.333  | -15.07 to 17.74   | No  | ns   |  |  |  |  |
| 50B vs. 60BC  | 48.33  | 31.93 to 64.74    | Yes | **** |  |  |  |  |
| 50B vs. 60B   | 40.67  | 24.26 to 57.07    | Yes | **** |  |  |  |  |
| 50B vs. 70BC  | 50.33  | 33.93 to 66.74    | Yes | **** |  |  |  |  |
| 50B vs. 70B   | 43.67  | 27.26 to 60.07    | Yes | **** |  |  |  |  |
| 60BC vs. 60B  | -7.667 | -24.07 to 8.741   | No  | ns   |  |  |  |  |
| 60BC vs. 70BC | 2      | -14.41 to 18.41   | No  | ns   |  |  |  |  |
| 60BC vs. 70B  | -4.667 | -21.07 to 11.74   | No  | ns   |  |  |  |  |
| 60B vs. 70BC  | 9.667  | -6.741 to 26.07   | No  | ns   |  |  |  |  |
| 60B vs. 70B   | 3      | -13.41 to 19.41   | No  | ns   |  |  |  |  |
| 70BC vs. 70B  | -6.667 | -23.07 to 9.741   | No  | ns   |  |  |  |  |
| 6.2           |        |                   |     |      |  |  |  |  |
| 20BC vs. 20B  | 18     | 1.592 to 34.41    | Yes | *    |  |  |  |  |
| 20BC vs. 30BC | -11.33 | -27.74 to 5.075   | No  | ns   |  |  |  |  |
| 20BC vs. 30B  | -19.33 | -35.74 to -2.925  | Yes | **   |  |  |  |  |
| 20BC vs. 40BC | -17.33 | -33.74 to -0.9253 | Yes | *    |  |  |  |  |
| 20BC vs. 40B  | -26.33 | -42.74 to -9.925  | Yes | **** |  |  |  |  |

|               |         |                  |     |      |  |  |  |  |
|---------------|---------|------------------|-----|------|--|--|--|--|
| 20BC vs. 50BC | -20.7   | -37.11 to -4.296 | Yes | **   |  |  |  |  |
| 20BC vs. 50B  | -11.67  | -28.07 to 4.741  | No  | ns   |  |  |  |  |
| 20BC vs. 60BC | -0.6667 | -17.07 to 15.74  | No  | ns   |  |  |  |  |
| 20BC vs. 60B  | 25      | 8.592 to 41.41   | Yes | ***  |  |  |  |  |
| 20BC vs. 70BC | 26      | 9.592 to 42.41   | Yes | **** |  |  |  |  |
| 20BC vs. 70B  | 35      | 18.59 to 51.41   | Yes | **** |  |  |  |  |
| 20B vs. 30BC  | -29.33  | -45.74 to -12.93 | Yes | **** |  |  |  |  |
| 20B vs. 30B   | -37.33  | -53.74 to -20.93 | Yes | **** |  |  |  |  |
| 20B vs. 40BC  | -35.33  | -51.74 to -18.93 | Yes | **** |  |  |  |  |
| 20B vs. 40B   | -44.33  | -60.74 to -27.93 | Yes | **** |  |  |  |  |
| 20B vs. 50BC  | -38.7   | -55.11 to -22.30 | Yes | **** |  |  |  |  |
| 20B vs. 50B   | -29.67  | -46.07 to -13.26 | Yes | **** |  |  |  |  |
| 20B vs. 60BC  | -18.67  | -35.07 to -2.259 | Yes | *    |  |  |  |  |
| 20B vs. 60B   | 7       | -9.408 to 23.41  | No  | ns   |  |  |  |  |
| 20B vs. 70BC  | 8       | -8.408 to 24.41  | No  | ns   |  |  |  |  |
| 20B vs. 70B   | 17      | 0.5920 to 33.41  | Yes | *    |  |  |  |  |
| 30BC vs. 30B  | -8      | -24.41 to 8.408  | No  | ns   |  |  |  |  |
| 30BC vs. 40BC | -6      | -22.41 to 10.41  | No  | ns   |  |  |  |  |
| 30BC vs. 40B  | -15     | -31.41 to 1.408  | No  | ns   |  |  |  |  |
| 30BC vs. 50BC | -9.371  | -25.78 to 7.037  | No  | ns   |  |  |  |  |
| 30BC vs. 50B  | -0.3333 | -16.74 to 16.07  | No  | ns   |  |  |  |  |
| 30BC vs. 60BC | 10.67   | -5.741 to 27.07  | No  | ns   |  |  |  |  |
| 30BC vs. 60B  | 36.33   | 19.93 to 52.74   | Yes | **** |  |  |  |  |
| 30BC vs. 70BC | 37.33   | 20.93 to 53.74   | Yes | **** |  |  |  |  |
| 30BC vs. 70B  | 46.33   | 29.93 to 62.74   | Yes | **** |  |  |  |  |
| 30B vs. 40BC  | 2       | -14.41 to 18.41  | No  | ns   |  |  |  |  |
| 30B vs. 40B   | -7      | -23.41 to 9.408  | No  | ns   |  |  |  |  |
| 30B vs. 50BC  | -1.371  | -17.78 to 15.04  | No  | ns   |  |  |  |  |
| 30B vs. 50B   | 7.667   | -8.741 to 24.07  | No  | ns   |  |  |  |  |
| 30B vs. 60BC  | 18.67   | 2.259 to 35.07   | Yes | *    |  |  |  |  |
| 30B vs. 60B   | 44.33   | 27.93 to 60.74   | Yes | **** |  |  |  |  |
| 30B vs. 70BC  | 45.33   | 28.93 to 61.74   | Yes | **** |  |  |  |  |
| 30B vs. 70B   | 54.33   | 37.93 to 70.74   | Yes | **** |  |  |  |  |
| 40BC vs. 40B  | -9      | -25.41 to 7.408  | No  | ns   |  |  |  |  |
| 40BC vs. 50BC | -3.371  | -19.78 to 13.04  | No  | ns   |  |  |  |  |
| 40BC vs. 50B  | 5.667   | -10.74 to 22.07  | No  | ns   |  |  |  |  |
| 40BC vs. 60BC | 16.67   | 0.2586 to 33.07  | Yes | *    |  |  |  |  |
| 40BC vs. 60B  | 42.33   | 25.93 to 58.74   | Yes | **** |  |  |  |  |
| 40BC vs. 70BC | 43.33   | 26.93 to 59.74   | Yes | **** |  |  |  |  |
| 40BC vs. 70B  | 52.33   | 35.93 to 68.74   | Yes | **** |  |  |  |  |
| 40B vs. 50BC  | 5.629   | -10.78 to 22.04  | No  | ns   |  |  |  |  |
| 40B vs. 50B   | 14.67   | -1.741 to 31.07  | No  | ns   |  |  |  |  |
| 40B vs. 60BC  | 25.67   | 9.259 to 42.07   | Yes | **** |  |  |  |  |

|               |        |                  |     |      |  |  |  |  |
|---------------|--------|------------------|-----|------|--|--|--|--|
| 40B vs. 60B   | 51.33  | 34.93 to 67.74   | Yes | **** |  |  |  |  |
| 40B vs. 70BC  | 52.33  | 35.93 to 68.74   | Yes | **** |  |  |  |  |
| 40B vs. 70B   | 61.33  | 44.93 to 77.74   | Yes | **** |  |  |  |  |
| 50BC vs. 50B  | 9.038  | -7.370 to 25.45  | No  | ns   |  |  |  |  |
| 50BC vs. 60BC | 20.04  | 3.630 to 36.45   | Yes | **   |  |  |  |  |
| 50BC vs. 60B  | 45.7   | 29.30 to 62.11   | Yes | **** |  |  |  |  |
| 50BC vs. 70BC | 46.7   | 30.30 to 63.11   | Yes | **** |  |  |  |  |
| 50BC vs. 70B  | 55.7   | 39.30 to 72.11   | Yes | **** |  |  |  |  |
| 50B vs. 60BC  | 11     | -5.408 to 27.41  | No  | ns   |  |  |  |  |
| 50B vs. 60B   | 36.67  | 20.26 to 53.07   | Yes | **** |  |  |  |  |
| 50B vs. 70BC  | 37.67  | 21.26 to 54.07   | Yes | **** |  |  |  |  |
| 50B vs. 70B   | 46.67  | 30.26 to 63.07   | Yes | **** |  |  |  |  |
| 60BC vs. 60B  | 25.67  | 9.259 to 42.07   | Yes | **** |  |  |  |  |
| 60BC vs. 70BC | 26.67  | 10.26 to 43.07   | Yes | **** |  |  |  |  |
| 60BC vs. 70B  | 35.67  | 19.26 to 52.07   | Yes | **** |  |  |  |  |
| 60B vs. 70BC  | 1      | -15.41 to 17.41  | No  | ns   |  |  |  |  |
| 60B vs. 70B   | 10     | -6.408 to 26.41  | No  | ns   |  |  |  |  |
| 70BC vs. 70B  | 9      | -7.408 to 25.41  | No  | ns   |  |  |  |  |
|               |        |                  |     |      |  |  |  |  |
| 5.6           |        |                  |     |      |  |  |  |  |
| 20BC vs. 20B  | 26.67  | 10.26 to 43.07   | Yes | **** |  |  |  |  |
| 20BC vs. 30BC | -11    | -27.41 to 5.408  | No  | ns   |  |  |  |  |
| 20BC vs. 30B  | -20.33 | -36.74 to -3.925 | Yes | **   |  |  |  |  |
| 20BC vs. 40BC | -25.67 | -42.07 to -9.259 | Yes | **** |  |  |  |  |
| 20BC vs. 40B  | -40.67 | -57.07 to -24.26 | Yes | **** |  |  |  |  |
| 20BC vs. 50BC | -29.41 | -45.82 to -13.00 | Yes | **** |  |  |  |  |
| 20BC vs. 50B  | -41.33 | -57.74 to -24.93 | Yes | **** |  |  |  |  |
| 20BC vs. 60BC | -11    | -27.41 to 5.408  | No  | ns   |  |  |  |  |
| 20BC vs. 60B  | -6     | -22.41 to 10.41  | No  | ns   |  |  |  |  |
| 20BC vs. 70BC | 6.333  | -10.07 to 22.74  | No  | ns   |  |  |  |  |
| 20BC vs. 70B  | 12     | -4.408 to 28.41  | No  | ns   |  |  |  |  |
| 20B vs. 30BC  | -37.67 | -54.07 to -21.26 | Yes | **** |  |  |  |  |
| 20B vs. 30B   | -47    | -63.41 to -30.59 | Yes | **** |  |  |  |  |
| 20B vs. 40BC  | -52.33 | -68.74 to -35.93 | Yes | **** |  |  |  |  |
| 20B vs. 40B   | -67.33 | -83.74 to -50.93 | Yes | **** |  |  |  |  |
| 20B vs. 50BC  | -56.08 | -72.49 to -39.67 | Yes | **** |  |  |  |  |
| 20B vs. 50B   | -68    | -84.41 to -51.59 | Yes | **** |  |  |  |  |
| 20B vs. 60BC  | -37.67 | -54.07 to -21.26 | Yes | **** |  |  |  |  |
| 20B vs. 60B   | -32.67 | -49.07 to -16.26 | Yes | **** |  |  |  |  |
| 20B vs. 70BC  | -20.33 | -36.74 to -3.925 | Yes | **   |  |  |  |  |
| 20B vs. 70B   | -14.67 | -31.07 to 1.741  | No  | ns   |  |  |  |  |
| 30BC vs. 30B  | -9.333 | -25.74 to 7.075  | No  | ns   |  |  |  |  |
| 30BC vs. 40BC | -14.67 | -31.07 to 1.741  | No  | ns   |  |  |  |  |

|               |         |                  |     |      |  |  |  |  |
|---------------|---------|------------------|-----|------|--|--|--|--|
| 30BC vs. 40B  | -29.67  | -46.07 to -13.26 | Yes | **** |  |  |  |  |
| 30BC vs. 50BC | -18.41  | -34.82 to -2.003 | Yes | *    |  |  |  |  |
| 30BC vs. 50B  | -30.33  | -46.74 to -13.93 | Yes | **** |  |  |  |  |
| 30BC vs. 60BC | 0       | -16.41 to 16.41  | No  | ns   |  |  |  |  |
| 30BC vs. 60B  | 5       | -11.41 to 21.41  | No  | ns   |  |  |  |  |
| 30BC vs. 70BC | 17.33   | 0.9253 to 33.74  | Yes | *    |  |  |  |  |
| 30BC vs. 70B  | 23      | 6.592 to 39.41   | Yes | ***  |  |  |  |  |
| 30B vs. 40BC  | -5.333  | -21.74 to 11.07  | No  | ns   |  |  |  |  |
| 30B vs. 40B   | -20.33  | -36.74 to -3.925 | Yes | **   |  |  |  |  |
| 30B vs. 50BC  | -9.078  | -25.49 to 7.330  | No  | ns   |  |  |  |  |
| 30B vs. 50B   | -21     | -37.41 to -4.592 | Yes | **   |  |  |  |  |
| 30B vs. 60BC  | 9.333   | -7.075 to 25.74  | No  | ns   |  |  |  |  |
| 30B vs. 60B   | 14.33   | -2.075 to 30.74  | No  | ns   |  |  |  |  |
| 30B vs. 70BC  | 26.67   | 10.26 to 43.07   | Yes | **** |  |  |  |  |
| 30B vs. 70B   | 32.33   | 15.93 to 48.74   | Yes | **** |  |  |  |  |
| 40BC vs. 40B  | -15     | -31.41 to 1.408  | No  | ns   |  |  |  |  |
| 40BC vs. 50BC | -3.745  | -20.15 to 12.66  | No  | ns   |  |  |  |  |
| 40BC vs. 50B  | -15.67  | -32.07 to 0.7414 | No  | ns   |  |  |  |  |
| 40BC vs. 60BC | 14.67   | -1.741 to 31.07  | No  | ns   |  |  |  |  |
| 40BC vs. 60B  | 19.67   | 3.259 to 36.07   | Yes | **   |  |  |  |  |
| 40BC vs. 70BC | 32      | 15.59 to 48.41   | Yes | **** |  |  |  |  |
| 40BC vs. 70B  | 37.67   | 21.26 to 54.07   | Yes | **** |  |  |  |  |
| 40B vs. 50BC  | 11.26   | -5.153 to 27.66  | No  | ns   |  |  |  |  |
| 40B vs. 50B   | -0.6667 | -17.07 to 15.74  | No  | ns   |  |  |  |  |
| 40B vs. 60BC  | 29.67   | 13.26 to 46.07   | Yes | **** |  |  |  |  |
| 40B vs. 60B   | 34.67   | 18.26 to 51.07   | Yes | **** |  |  |  |  |
| 40B vs. 70BC  | 47      | 30.59 to 63.41   | Yes | **** |  |  |  |  |
| 40B vs. 70B   | 52.67   | 36.26 to 69.07   | Yes | **** |  |  |  |  |
| 50BC vs. 50B  | -11.92  | -28.33 to 4.486  | No  | ns   |  |  |  |  |
| 50BC vs. 60BC | 18.41   | 2.003 to 34.82   | Yes | *    |  |  |  |  |
| 50BC vs. 60B  | 23.41   | 7.003 to 39.82   | Yes | ***  |  |  |  |  |
| 50BC vs. 70BC | 35.74   | 19.34 to 52.15   | Yes | **** |  |  |  |  |
| 50BC vs. 70B  | 41.41   | 25.00 to 57.82   | Yes | **** |  |  |  |  |
| 50B vs. 60BC  | 30.33   | 13.93 to 46.74   | Yes | **** |  |  |  |  |
| 50B vs. 60B   | 35.33   | 18.93 to 51.74   | Yes | **** |  |  |  |  |
| 50B vs. 70BC  | 47.67   | 31.26 to 64.07   | Yes | **** |  |  |  |  |
| 50B vs. 70B   | 53.33   | 36.93 to 69.74   | Yes | **** |  |  |  |  |
| 60BC vs. 60B  | 5       | -11.41 to 21.41  | No  | ns   |  |  |  |  |
| 60BC vs. 70BC | 17.33   | 0.9253 to 33.74  | Yes | *    |  |  |  |  |
| 60BC vs. 70B  | 23      | 6.592 to 39.41   | Yes | ***  |  |  |  |  |
| 60B vs. 70BC  | 12.33   | -4.075 to 28.74  | No  | ns   |  |  |  |  |
| 60B vs. 70B   | 18      | 1.592 to 34.41   | Yes | *    |  |  |  |  |
| 70BC vs. 70B  | 5.667   | -10.74 to 22.07  | No  | ns   |  |  |  |  |

| Test details  | Mean 1 | Mean 2 | Mean Diff. | SE of diff. | N1 | N2 | q           | D<br>F |
|---------------|--------|--------|------------|-------------|----|----|-------------|--------|
| 7.4           |        |        |            |             |    |    |             |        |
| 20BC vs. 20B  | 6.333  | 12.67  | -6.333     | 4.898       | 3  | 3  | 1.829       | 96     |
| 20BC vs. 30BC | 6.333  | 16.33  | -10        | 4.898       | 3  | 3  | 2.887       | 96     |
| 20BC vs. 30B  | 6.333  | 30     | -23.67     | 4.898       | 3  | 3  | 6.834       | 96     |
| 20BC vs. 40BC | 6.333  | 4.333  | 2          | 4.898       | 3  | 3  | 0.577<br>5  | 96     |
| 20BC vs. 40B  | 6.333  | 16     | -9.667     | 4.898       | 3  | 3  | 2.791       | 96     |
| 20BC vs. 50BC | 6.333  | -1.35  | 7.683      | 4.898       | 3  | 3  | 2.218       | 96     |
| 20BC vs. 50B  | 6.333  | 8.333  | -2         | 4.898       | 3  | 3  | 0.577<br>5  | 96     |
| 20BC vs. 60BC | 6.333  | -2.667 | 9          | 4.898       | 3  | 3  | 2.599       | 96     |
| 20BC vs. 60B  | 6.333  | 11     | -4.667     | 4.898       | 3  | 3  | 1.347       | 96     |
| 20BC vs. 70BC | 6.333  | 0.3333 | 6          | 4.898       | 3  | 3  | 1.732       | 96     |
| 20BC vs. 70B  | 6.333  | 8.333  | -2         | 4.898       | 3  | 3  | 0.577<br>5  | 96     |
| 20B vs. 30BC  | 12.67  | 16.33  | -3.667     | 4.898       | 3  | 3  | 1.059       | 96     |
| 20B vs. 30B   | 12.67  | 30     | -17.33     | 4.898       | 3  | 3  | 5.005       | 96     |
| 20B vs. 40BC  | 12.67  | 4.333  | 8.333      | 4.898       | 3  | 3  | 2.406       | 96     |
| 20B vs. 40B   | 12.67  | 16     | -3.333     | 4.898       | 3  | 3  | 0.962<br>5  | 96     |
| 20B vs. 50BC  | 12.67  | -1.35  | 14.02      | 4.898       | 3  | 3  | 4.047       | 96     |
| 20B vs. 50B   | 12.67  | 8.333  | 4.333      | 4.898       | 3  | 3  | 1.251       | 96     |
| 20B vs. 60BC  | 12.67  | -2.667 | 15.33      | 4.898       | 3  | 3  | 4.427       | 96     |
| 20B vs. 60B   | 12.67  | 11     | 1.667      | 4.898       | 3  | 3  | 0.481<br>2  | 96     |
| 20B vs. 70BC  | 12.67  | 0.3333 | 12.33      | 4.898       | 3  | 3  | 3.561       | 96     |
| 20B vs. 70B   | 12.67  | 8.333  | 4.333      | 4.898       | 3  | 3  | 1.251       | 96     |
| 30BC vs. 30B  | 16.33  | 30     | -13.67     | 4.898       | 3  | 3  | 3.946       | 96     |
| 30BC vs. 40BC | 16.33  | 4.333  | 12         | 4.898       | 3  | 3  | 3.465       | 96     |
| 30BC vs. 40B  | 16.33  | 16     | 0.3333     | 4.898       | 3  | 3  | 0.096<br>25 | 96     |
| 30BC vs. 50BC | 16.33  | -1.35  | 17.68      | 4.898       | 3  | 3  | 5.106       | 96     |
| 30BC vs. 50B  | 16.33  | 8.333  | 8          | 4.898       | 3  | 3  | 2.31        | 96     |
| 30BC vs. 60BC | 16.33  | -2.667 | 19         | 4.898       | 3  | 3  | 5.486       | 96     |
| 30BC vs. 60B  | 16.33  | 11     | 5.333      | 4.898       | 3  | 3  | 1.54        | 96     |
| 30BC vs. 70BC | 16.33  | 0.3333 | 16         | 4.898       | 3  | 3  | 4.62        | 96     |
| 30BC vs. 70B  | 16.33  | 8.333  | 8          | 4.898       | 3  | 3  | 2.31        | 96     |
| 30B vs. 40BC  | 30     | 4.333  | 25.67      | 4.898       | 3  | 3  | 7.411       | 96     |
| 30B vs. 40B   | 30     | 16     | 14         | 4.898       | 3  | 3  | 4.042       | 96     |
| 30B vs. 50BC  | 30     | -1.35  | 31.35      | 4.898       | 3  | 3  | 9.052       | 96     |
| 30B vs. 50B   | 30     | 8.333  | 21.67      | 4.898       | 3  | 3  | 6.256       | 96     |
| 30B vs. 60BC  | 30     | -2.667 | 32.67      | 4.898       | 3  | 3  | 9.432       | 96     |
| 30B vs. 60B   | 30     | 11     | 19         | 4.898       | 3  | 3  | 5.486       | 96     |
| 30B vs. 70BC  | 30     | 0.3333 | 29.67      | 4.898       | 3  | 3  | 8.566       | 96     |
| 30B vs. 70B   | 30     | 8.333  | 21.67      | 4.898       | 3  | 3  | 6.256       | 96     |
| 40BC vs. 40B  | 4.333  | 16     | -11.67     | 4.898       | 3  | 3  | 3.369       | 96     |
| 40BC vs. 50BC | 4.333  | -1.35  | 5.683      | 4.898       | 3  | 3  | 1.641       | 96     |

|               |        |        |        |       |   |   |            |    |
|---------------|--------|--------|--------|-------|---|---|------------|----|
| 40BC vs. 50B  | 4.333  | 8.333  | -4     | 4.898 | 3 | 3 | 1.155      | 96 |
| 40BC vs. 60BC | 4.333  | -2.667 | 7      | 4.898 | 3 | 3 | 2.021      | 96 |
| 40BC vs. 60B  | 4.333  | 11     | -6.667 | 4.898 | 3 | 3 | 1.925      | 96 |
| 40BC vs. 70BC | 4.333  | 0.3333 | 4      | 4.898 | 3 | 3 | 1.155      | 96 |
| 40BC vs. 70B  | 4.333  | 8.333  | -4     | 4.898 | 3 | 3 | 1.155      | 96 |
| 40B vs. 50BC  | 16     | -1.35  | 17.35  | 4.898 | 3 | 3 | 5.01       | 96 |
| 40B vs. 50B   | 16     | 8.333  | 7.667  | 4.898 | 3 | 3 | 2.214      | 96 |
| 40B vs. 60BC  | 16     | -2.667 | 18.67  | 4.898 | 3 | 3 | 5.39       | 96 |
| 40B vs. 60B   | 16     | 11     | 5      | 4.898 | 3 | 3 | 1.444      | 96 |
| 40B vs. 70BC  | 16     | 0.3333 | 15.67  | 4.898 | 3 | 3 | 4.524      | 96 |
| 40B vs. 70B   | 16     | 8.333  | 7.667  | 4.898 | 3 | 3 | 2.214      | 96 |
| 50BC vs. 50B  | -1.35  | 8.333  | -9.683 | 4.898 | 3 | 3 | 2.796      | 96 |
| 50BC vs. 60BC | -1.35  | -2.667 | 1.317  | 4.898 | 3 | 3 | 0.380<br>3 | 96 |
| 50BC vs. 60B  | -1.35  | 11     | -12.35 | 4.898 | 3 | 3 | 3.566      | 96 |
| 50BC vs. 70BC | -1.35  | 0.3333 | -1.683 | 4.898 | 3 | 3 | 0.486      | 96 |
| 50BC vs. 70B  | -1.35  | 8.333  | -9.683 | 4.898 | 3 | 3 | 2.796      | 96 |
| 50B vs. 60BC  | 8.333  | -2.667 | 11     | 4.898 | 3 | 3 | 3.176      | 96 |
| 50B vs. 60B   | 8.333  | 11     | -2.667 | 4.898 | 3 | 3 | 0.77       | 96 |
| 50B vs. 70BC  | 8.333  | 0.3333 | 8      | 4.898 | 3 | 3 | 2.31       | 96 |
| 50B vs. 70B   | 8.333  | 8.333  | 0      | 4.898 | 3 | 3 | 0          | 96 |
| 60BC vs. 60B  | -2.667 | 11     | -13.67 | 4.898 | 3 | 3 | 3.946      | 96 |
| 60BC vs. 70BC | -2.667 | 0.3333 | -3     | 4.898 | 3 | 3 | 0.866<br>2 | 96 |
| 60BC vs. 70B  | -2.667 | 8.333  | -11    | 4.898 | 3 | 3 | 3.176      | 96 |
| 60B vs. 70BC  | 11     | 0.3333 | 10.67  | 4.898 | 3 | 3 | 3.08       | 96 |
| 60B vs. 70B   | 11     | 8.333  | 2.667  | 4.898 | 3 | 3 | 0.77       | 96 |
| 70BC vs. 70B  | 0.3333 | 8.333  | -8     | 4.898 | 3 | 3 | 2.31       | 96 |
|               |        |        |        |       |   |   |            |    |
| 6.8           |        |        |        |       |   |   |            |    |
| 20BC vs. 20B  | 25     | 16.33  | 8.667  | 4.898 | 3 | 3 | 2.502      | 96 |
| 20BC vs. 30BC | 25     | 35     | -10    | 4.898 | 3 | 3 | 2.887      | 96 |
| 20BC vs. 30B  | 25     | 51.33  | -26.33 | 4.898 | 3 | 3 | 7.604      | 96 |
| 20BC vs. 40BC | 25     | 23     | 2      | 4.898 | 3 | 3 | 0.577<br>5 | 96 |
| 20BC vs. 40B  | 25     | 39     | -14    | 4.898 | 3 | 3 | 4.042      | 96 |
| 20BC vs. 50BC | 25     | 7      | 18     | 4.898 | 3 | 3 | 5.197      | 96 |
| 20BC vs. 50B  | 25     | 49.33  | -24.33 | 4.898 | 3 | 3 | 7.026      | 96 |
| 20BC vs. 60BC | 25     | 1      | 24     | 4.898 | 3 | 3 | 6.93       | 96 |
| 20BC vs. 60B  | 25     | 8.667  | 16.33  | 4.898 | 3 | 3 | 4.716      | 96 |
| 20BC vs. 70BC | 25     | -1     | 26     | 4.898 | 3 | 3 | 7.507      | 96 |
| 20BC vs. 70B  | 25     | 5.667  | 19.33  | 4.898 | 3 | 3 | 5.582      | 96 |
| 20B vs. 30BC  | 16.33  | 35     | -18.67 | 4.898 | 3 | 3 | 5.39       | 96 |
| 20B vs. 30B   | 16.33  | 51.33  | -35    | 4.898 | 3 | 3 | 10.11      | 96 |
| 20B vs. 40BC  | 16.33  | 23     | -6.667 | 4.898 | 3 | 3 | 1.925      | 96 |
| 20B vs. 40B   | 16.33  | 39     | -22.67 | 4.898 | 3 | 3 | 6.545      | 96 |
| 20B vs. 50BC  | 16.33  | 7      | 9.333  | 4.898 | 3 | 3 | 2.695      | 96 |
| 20B vs. 50B   | 16.33  | 49.33  | -33    | 4.898 | 3 | 3 | 9.529      | 96 |



|               |       |       |        |       |   |   |            |    |
|---------------|-------|-------|--------|-------|---|---|------------|----|
| 20B vs. 60BC  | 16.33 | 1     | 15.33  | 4.898 | 3 | 3 | 4.427      | 96 |
| 20B vs. 60B   | 16.33 | 8.667 | 7.667  | 4.898 | 3 | 3 | 2.214      | 96 |
| 20B vs. 70BC  | 16.33 | -1    | 17.33  | 4.898 | 3 | 3 | 5.005      | 96 |
| 20B vs. 70B   | 16.33 | 5.667 | 10.67  | 4.898 | 3 | 3 | 3.08       | 96 |
| 30BC vs. 30B  | 35    | 51.33 | -16.33 | 4.898 | 3 | 3 | 4.716      | 96 |
| 30BC vs. 40BC | 35    | 23    | 12     | 4.898 | 3 | 3 | 3.465      | 96 |
| 30BC vs. 40B  | 35    | 39    | -4     | 4.898 | 3 | 3 | 1.155      | 96 |
| 30BC vs. 50BC | 35    | 7     | 28     | 4.898 | 3 | 3 | 8.085      | 96 |
| 30BC vs. 50B  | 35    | 49.33 | -14.33 | 4.898 | 3 | 3 | 4.139      | 96 |
| 30BC vs. 60BC | 35    | 1     | 34     | 4.898 | 3 | 3 | 9.817      | 96 |
| 30BC vs. 60B  | 35    | 8.667 | 26.33  | 4.898 | 3 | 3 | 7.604      | 96 |
| 30BC vs. 70BC | 35    | -1    | 36     | 4.898 | 3 | 3 | 10.39      | 96 |
| 30BC vs. 70B  | 35    | 5.667 | 29.33  | 4.898 | 3 | 3 | 8.47       | 96 |
| 30B vs. 40BC  | 51.33 | 23    | 28.33  | 4.898 | 3 | 3 | 8.181      | 96 |
| 30B vs. 40B   | 51.33 | 39    | 12.33  | 4.898 | 3 | 3 | 3.561      | 96 |
| 30B vs. 50BC  | 51.33 | 7     | 44.33  | 4.898 | 3 | 3 | 12.8       | 96 |
| 30B vs. 50B   | 51.33 | 49.33 | 2      | 4.898 | 3 | 3 | 0.577<br>5 | 96 |
| 30B vs. 60BC  | 51.33 | 1     | 50.33  | 4.898 | 3 | 3 | 14.53      | 96 |
| 30B vs. 60B   | 51.33 | 8.667 | 42.67  | 4.898 | 3 | 3 | 12.32      | 96 |
| 30B vs. 70BC  | 51.33 | -1    | 52.33  | 4.898 | 3 | 3 | 15.11      | 96 |
| 30B vs. 70B   | 51.33 | 5.667 | 45.67  | 4.898 | 3 | 3 | 13.19      | 96 |
| 40BC vs. 40B  | 23    | 39    | -16    | 4.898 | 3 | 3 | 4.62       | 96 |
| 40BC vs. 50BC | 23    | 7     | 16     | 4.898 | 3 | 3 | 4.62       | 96 |
| 40BC vs. 50B  | 23    | 49.33 | -26.33 | 4.898 | 3 | 3 | 7.604      | 96 |
| 40BC vs. 60BC | 23    | 1     | 22     | 4.898 | 3 | 3 | 6.352      | 96 |
| 40BC vs. 60B  | 23    | 8.667 | 14.33  | 4.898 | 3 | 3 | 4.139      | 96 |
| 40BC vs. 70BC | 23    | -1    | 24     | 4.898 | 3 | 3 | 6.93       | 96 |
| 40BC vs. 70B  | 23    | 5.667 | 17.33  | 4.898 | 3 | 3 | 5.005      | 96 |
| 40B vs. 50BC  | 39    | 7     | 32     | 4.898 | 3 | 3 | 9.24       | 96 |
| 40B vs. 50B   | 39    | 49.33 | -10.33 | 4.898 | 3 | 3 | 2.984      | 96 |
| 40B vs. 60BC  | 39    | 1     | 38     | 4.898 | 3 | 3 | 10.97      | 96 |
| 40B vs. 60B   | 39    | 8.667 | 30.33  | 4.898 | 3 | 3 | 8.759      | 96 |
| 40B vs. 70BC  | 39    | -1    | 40     | 4.898 | 3 | 3 | 11.55      | 96 |
| 40B vs. 70B   | 39    | 5.667 | 33.33  | 4.898 | 3 | 3 | 9.625      | 96 |
| 50BC vs. 50B  | 7     | 49.33 | -42.33 | 4.898 | 3 | 3 | 12.22      | 96 |
| 50BC vs. 60BC | 7     | 1     | 6      | 4.898 | 3 | 3 | 1.732      | 96 |
| 50BC vs. 60B  | 7     | 8.667 | -1.667 | 4.898 | 3 | 3 | 0.481<br>2 | 96 |
| 50BC vs. 70BC | 7     | -1    | 8      | 4.898 | 3 | 3 | 2.31       | 96 |
| 50BC vs. 70B  | 7     | 5.667 | 1.333  | 4.898 | 3 | 3 | 0.385      | 96 |
| 50B vs. 60BC  | 49.33 | 1     | 48.33  | 4.898 | 3 | 3 | 13.96      | 96 |
| 50B vs. 60B   | 49.33 | 8.667 | 40.67  | 4.898 | 3 | 3 | 11.74      | 96 |
| 50B vs. 70BC  | 49.33 | -1    | 50.33  | 4.898 | 3 | 3 | 14.53      | 96 |
| 50B vs. 70B   | 49.33 | 5.667 | 43.67  | 4.898 | 3 | 3 | 12.61      | 96 |
| 60BC vs. 60B  | 1     | 8.667 | -7.667 | 4.898 | 3 | 3 | 2.214      | 96 |
| 60BC vs. 70BC | 1     | -1    | 2      | 4.898 | 3 | 3 | 0.577<br>5 | 96 |

|               |       |       |         |       |   |   |             |    |
|---------------|-------|-------|---------|-------|---|---|-------------|----|
| 60BC vs. 70B  | 1     | 5.667 | -4.667  | 4.898 | 3 | 3 | 1.347       | 96 |
| 60B vs. 70BC  | 8.667 | -1    | 9.667   | 4.898 | 3 | 3 | 2.791       | 96 |
| 60B vs. 70B   | 8.667 | 5.667 | 3       | 4.898 | 3 | 3 | 0.866<br>2  | 96 |
| 70BC vs. 70B  | -1    | 5.667 | -6.667  | 4.898 | 3 | 3 | 1.925       | 96 |
|               |       |       |         |       |   |   |             |    |
| 6.2           |       |       |         |       |   |   |             |    |
| 20BC vs. 20B  | 41    | 23    | 18      | 4.898 | 3 | 3 | 5.197       | 96 |
| 20BC vs. 30BC | 41    | 52.33 | -11.33  | 4.898 | 3 | 3 | 3.272       | 96 |
| 20BC vs. 30B  | 41    | 60.33 | -19.33  | 4.898 | 3 | 3 | 5.582       | 96 |
| 20BC vs. 40BC | 41    | 58.33 | -17.33  | 4.898 | 3 | 3 | 5.005       | 96 |
| 20BC vs. 40B  | 41    | 67.33 | -26.33  | 4.898 | 3 | 3 | 7.604       | 96 |
| 20BC vs. 50BC | 41    | 61.7  | -20.7   | 4.898 | 3 | 3 | 5.978       | 96 |
| 20BC vs. 50B  | 41    | 52.67 | -11.67  | 4.898 | 3 | 3 | 3.369       | 96 |
| 20BC vs. 60BC | 41    | 41.67 | -0.6667 | 4.898 | 3 | 3 | 0.192<br>5  | 96 |
| 20BC vs. 60B  | 41    | 16    | 25      | 4.898 | 3 | 3 | 7.219       | 96 |
| 20BC vs. 70BC | 41    | 15    | 26      | 4.898 | 3 | 3 | 7.507       | 96 |
| 20BC vs. 70B  | 41    | 6     | 35      | 4.898 | 3 | 3 | 10.11       | 96 |
| 20B vs. 30BC  | 23    | 52.33 | -29.33  | 4.898 | 3 | 3 | 8.47        | 96 |
| 20B vs. 30B   | 23    | 60.33 | -37.33  | 4.898 | 3 | 3 | 10.78       | 96 |
| 20B vs. 40BC  | 23    | 58.33 | -35.33  | 4.898 | 3 | 3 | 10.2        | 96 |
| 20B vs. 40B   | 23    | 67.33 | -44.33  | 4.898 | 3 | 3 | 12.8        | 96 |
| 20B vs. 50BC  | 23    | 61.7  | -38.7   | 4.898 | 3 | 3 | 11.18       | 96 |
| 20B vs. 50B   | 23    | 52.67 | -29.67  | 4.898 | 3 | 3 | 8.566       | 96 |
| 20B vs. 60BC  | 23    | 41.67 | -18.67  | 4.898 | 3 | 3 | 5.39        | 96 |
| 20B vs. 60B   | 23    | 16    | 7       | 4.898 | 3 | 3 | 2.021       | 96 |
| 20B vs. 70BC  | 23    | 15    | 8       | 4.898 | 3 | 3 | 2.31        | 96 |
| 20B vs. 70B   | 23    | 6     | 17      | 4.898 | 3 | 3 | 4.909       | 96 |
| 30BC vs. 30B  | 52.33 | 60.33 | -8      | 4.898 | 3 | 3 | 2.31        | 96 |
| 30BC vs. 40BC | 52.33 | 58.33 | -6      | 4.898 | 3 | 3 | 1.732       | 96 |
| 30BC vs. 40B  | 52.33 | 67.33 | -15     | 4.898 | 3 | 3 | 4.331       | 96 |
| 30BC vs. 50BC | 52.33 | 61.7  | -9.371  | 4.898 | 3 | 3 | 2.706       | 96 |
| 30BC vs. 50B  | 52.33 | 52.67 | -0.3333 | 4.898 | 3 | 3 | 0.096<br>25 | 96 |
| 30BC vs. 60BC | 52.33 | 41.67 | 10.67   | 4.898 | 3 | 3 | 3.08        | 96 |
| 30BC vs. 60B  | 52.33 | 16    | 36.33   | 4.898 | 3 | 3 | 10.49       | 96 |
| 30BC vs. 70BC | 52.33 | 15    | 37.33   | 4.898 | 3 | 3 | 10.78       | 96 |
| 30BC vs. 70B  | 52.33 | 6     | 46.33   | 4.898 | 3 | 3 | 13.38       | 96 |
| 30B vs. 40BC  | 60.33 | 58.33 | 2       | 4.898 | 3 | 3 | 0.577<br>5  | 96 |
| 30B vs. 40B   | 60.33 | 67.33 | -7      | 4.898 | 3 | 3 | 2.021       | 96 |
| 30B vs. 50BC  | 60.33 | 61.7  | -1.371  | 4.898 | 3 | 3 | 0.395<br>9  | 96 |
| 30B vs. 50B   | 60.33 | 52.67 | 7.667   | 4.898 | 3 | 3 | 2.214       | 96 |
| 30B vs. 60BC  | 60.33 | 41.67 | 18.67   | 4.898 | 3 | 3 | 5.39        | 96 |
| 30B vs. 60B   | 60.33 | 16    | 44.33   | 4.898 | 3 | 3 | 12.8        | 96 |
| 30B vs. 70BC  | 60.33 | 15    | 45.33   | 4.898 | 3 | 3 | 13.09       | 96 |
| 30B vs. 70B   | 60.33 | 6     | 54.33   | 4.898 | 3 | 3 | 15.69       | 96 |
| 40BC vs. 40B  | 58.33 | 67.33 | -9      | 4.898 | 3 | 3 | 2.599       | 96 |

|               |       |       |        |       |   |   |            |    |
|---------------|-------|-------|--------|-------|---|---|------------|----|
| 40BC vs. 50BC | 58.33 | 61.7  | -3.371 | 4.898 | 3 | 3 | 0.973<br>4 | 96 |
| 40BC vs. 50B  | 58.33 | 52.67 | 5.667  | 4.898 | 3 | 3 | 1.636      | 96 |
| 40BC vs. 60BC | 58.33 | 41.67 | 16.67  | 4.898 | 3 | 3 | 4.812      | 96 |
| 40BC vs. 60B  | 58.33 | 16    | 42.33  | 4.898 | 3 | 3 | 12.22      | 96 |
| 40BC vs. 70BC | 58.33 | 15    | 43.33  | 4.898 | 3 | 3 | 12.51      | 96 |
| 40BC vs. 70B  | 58.33 | 6     | 52.33  | 4.898 | 3 | 3 | 15.11      | 96 |
| 40B vs. 50BC  | 67.33 | 61.7  | 5.629  | 4.898 | 3 | 3 | 1.625      | 96 |
| 40B vs. 50B   | 67.33 | 52.67 | 14.67  | 4.898 | 3 | 3 | 4.235      | 96 |
| 40B vs. 60BC  | 67.33 | 41.67 | 25.67  | 4.898 | 3 | 3 | 7.411      | 96 |
| 40B vs. 60B   | 67.33 | 16    | 51.33  | 4.898 | 3 | 3 | 14.82      | 96 |
| 40B vs. 70BC  | 67.33 | 15    | 52.33  | 4.898 | 3 | 3 | 15.11      | 96 |
| 40B vs. 70B   | 67.33 | 6     | 61.33  | 4.898 | 3 | 3 | 17.71      | 96 |
| 50BC vs. 50B  | 61.7  | 52.67 | 9.038  | 4.898 | 3 | 3 | 2.61       | 96 |
| 50BC vs. 60BC | 61.7  | 41.67 | 20.04  | 4.898 | 3 | 3 | 5.786      | 96 |
| 50BC vs. 60B  | 61.7  | 16    | 45.7   | 4.898 | 3 | 3 | 13.2       | 96 |
| 50BC vs. 70BC | 61.7  | 15    | 46.7   | 4.898 | 3 | 3 | 13.49      | 96 |
| 50BC vs. 70B  | 61.7  | 6     | 55.7   | 4.898 | 3 | 3 | 16.08      | 96 |
| 50B vs. 60BC  | 52.67 | 41.67 | 11     | 4.898 | 3 | 3 | 3.176      | 96 |
| 50B vs. 60B   | 52.67 | 16    | 36.67  | 4.898 | 3 | 3 | 10.59      | 96 |
| 50B vs. 70BC  | 52.67 | 15    | 37.67  | 4.898 | 3 | 3 | 10.88      | 96 |
| 50B vs. 70B   | 52.67 | 6     | 46.67  | 4.898 | 3 | 3 | 13.47      | 96 |
| 60BC vs. 60B  | 41.67 | 16    | 25.67  | 4.898 | 3 | 3 | 7.411      | 96 |
| 60BC vs. 70BC | 41.67 | 15    | 26.67  | 4.898 | 3 | 3 | 7.7        | 96 |
| 60BC vs. 70B  | 41.67 | 6     | 35.67  | 4.898 | 3 | 3 | 10.3       | 96 |
| 60B vs. 70BC  | 16    | 15    | 1      | 4.898 | 3 | 3 | 0.288<br>7 | 96 |
| 60B vs. 70B   | 16    | 6     | 10     | 4.898 | 3 | 3 | 2.887      | 96 |
| 70BC vs. 70B  | 15    | 6     | 9      | 4.898 | 3 | 3 | 2.599      | 96 |
|               |       |       |        |       |   |   |            |    |
| 5.6           |       |       |        |       |   |   |            |    |
| 20BC vs. 20B  | 60    | 33.33 | 26.67  | 4.898 | 3 | 3 | 7.7        | 96 |
| 20BC vs. 30BC | 60    | 71    | -11    | 4.898 | 3 | 3 | 3.176      | 96 |
| 20BC vs. 30B  | 60    | 80.33 | -20.33 | 4.898 | 3 | 3 | 5.871      | 96 |
| 20BC vs. 40BC | 60    | 85.67 | -25.67 | 4.898 | 3 | 3 | 7.411      | 96 |
| 20BC vs. 40B  | 60    | 100.7 | -40.67 | 4.898 | 3 | 3 | 11.74      | 96 |
| 20BC vs. 50BC | 60    | 89.41 | -29.41 | 4.898 | 3 | 3 | 8.492      | 96 |
| 20BC vs. 50B  | 60    | 101.3 | -41.33 | 4.898 | 3 | 3 | 11.93      | 96 |
| 20BC vs. 60BC | 60    | 71    | -11    | 4.898 | 3 | 3 | 3.176      | 96 |
| 20BC vs. 60B  | 60    | 66    | -6     | 4.898 | 3 | 3 | 1.732      | 96 |
| 20BC vs. 70BC | 60    | 53.67 | 6.333  | 4.898 | 3 | 3 | 1.829      | 96 |
| 20BC vs. 70B  | 60    | 48    | 12     | 4.898 | 3 | 3 | 3.465      | 96 |
| 20B vs. 30BC  | 33.33 | 71    | -37.67 | 4.898 | 3 | 3 | 10.88      | 96 |
| 20B vs. 30B   | 33.33 | 80.33 | -47    | 4.898 | 3 | 3 | 13.57      | 96 |
| 20B vs. 40BC  | 33.33 | 85.67 | -52.33 | 4.898 | 3 | 3 | 15.11      | 96 |
| 20B vs. 40B   | 33.33 | 100.7 | -67.33 | 4.898 | 3 | 3 | 19.44      | 96 |
| 20B vs. 50BC  | 33.33 | 89.41 | -56.08 | 4.898 | 3 | 3 | 16.19      | 96 |

|               |       |       |         |       |   |   |        |    |
|---------------|-------|-------|---------|-------|---|---|--------|----|
| 20B vs. 50B   | 33.33 | 101.3 | -68     | 4.898 | 3 | 3 | 19.63  | 96 |
| 20B vs. 60BC  | 33.33 | 71    | -37.67  | 4.898 | 3 | 3 | 10.88  | 96 |
| 20B vs. 60B   | 33.33 | 66    | -32.67  | 4.898 | 3 | 3 | 9.432  | 96 |
| 20B vs. 70BC  | 33.33 | 53.67 | -20.33  | 4.898 | 3 | 3 | 5.871  | 96 |
| 20B vs. 70B   | 33.33 | 48    | -14.67  | 4.898 | 3 | 3 | 4.235  | 96 |
| 30BC vs. 30B  | 71    | 80.33 | -9.333  | 4.898 | 3 | 3 | 2.695  | 96 |
| 30BC vs. 40BC | 71    | 85.67 | -14.67  | 4.898 | 3 | 3 | 4.235  | 96 |
| 30BC vs. 40B  | 71    | 100.7 | -29.67  | 4.898 | 3 | 3 | 8.566  | 96 |
| 30BC vs. 50BC | 71    | 89.41 | -18.41  | 4.898 | 3 | 3 | 5.316  | 96 |
| 30BC vs. 50B  | 71    | 101.3 | -30.33  | 4.898 | 3 | 3 | 8.759  | 96 |
| 30BC vs. 60BC | 71    | 71    | 0       | 4.898 | 3 | 3 | 0      | 96 |
| 30BC vs. 60B  | 71    | 66    | 5       | 4.898 | 3 | 3 | 1.444  | 96 |
| 30BC vs. 70BC | 71    | 53.67 | 17.33   | 4.898 | 3 | 3 | 5.005  | 96 |
| 30BC vs. 70B  | 71    | 48    | 23      | 4.898 | 3 | 3 | 6.641  | 96 |
| 30B vs. 40BC  | 80.33 | 85.67 | -5.333  | 4.898 | 3 | 3 | 1.54   | 96 |
| 30B vs. 40B   | 80.33 | 100.7 | -20.33  | 4.898 | 3 | 3 | 5.871  | 96 |
| 30B vs. 50BC  | 80.33 | 89.41 | -9.078  | 4.898 | 3 | 3 | 2.621  | 96 |
| 30B vs. 50B   | 80.33 | 101.3 | -21     | 4.898 | 3 | 3 | 6.064  | 96 |
| 30B vs. 60BC  | 80.33 | 71    | 9.333   | 4.898 | 3 | 3 | 2.695  | 96 |
| 30B vs. 60B   | 80.33 | 66    | 14.33   | 4.898 | 3 | 3 | 4.139  | 96 |
| 30B vs. 70BC  | 80.33 | 53.67 | 26.67   | 4.898 | 3 | 3 | 7.7    | 96 |
| 30B vs. 70B   | 80.33 | 48    | 32.33   | 4.898 | 3 | 3 | 9.336  | 96 |
| 40BC vs. 40B  | 85.67 | 100.7 | -15     | 4.898 | 3 | 3 | 4.331  | 96 |
| 40BC vs. 50BC | 85.67 | 89.41 | -3.745  | 4.898 | 3 | 3 | 1.081  | 96 |
| 40BC vs. 50B  | 85.67 | 101.3 | -15.67  | 4.898 | 3 | 3 | 4.524  | 96 |
| 40BC vs. 60BC | 85.67 | 71    | 14.67   | 4.898 | 3 | 3 | 4.235  | 96 |
| 40BC vs. 60B  | 85.67 | 66    | 19.67   | 4.898 | 3 | 3 | 5.679  | 96 |
| 40BC vs. 70BC | 85.67 | 53.67 | 32      | 4.898 | 3 | 3 | 9.24   | 96 |
| 40BC vs. 70B  | 85.67 | 48    | 37.67   | 4.898 | 3 | 3 | 10.88  | 96 |
| 40B vs. 50BC  | 100.7 | 89.41 | 11.26   | 4.898 | 3 | 3 | 3.25   | 96 |
| 40B vs. 50B   | 100.7 | 101.3 | -0.6667 | 4.898 | 3 | 3 | 0.1925 | 96 |
| 40B vs. 60BC  | 100.7 | 71    | 29.67   | 4.898 | 3 | 3 | 8.566  | 96 |
| 40B vs. 60B   | 100.7 | 66    | 34.67   | 4.898 | 3 | 3 | 10.01  | 96 |
| 40B vs. 70BC  | 100.7 | 53.67 | 47      | 4.898 | 3 | 3 | 13.57  | 96 |
| 40B vs. 70B   | 100.7 | 48    | 52.67   | 4.898 | 3 | 3 | 15.21  | 96 |
| 50BC vs. 50B  | 89.41 | 101.3 | -11.92  | 4.898 | 3 | 3 | 3.442  | 96 |
| 50BC vs. 60BC | 89.41 | 71    | 18.41   | 4.898 | 3 | 3 | 5.316  | 96 |
| 50BC vs. 60B  | 89.41 | 66    | 23.41   | 4.898 | 3 | 3 | 6.76   | 96 |
| 50BC vs. 70BC | 89.41 | 53.67 | 35.74   | 4.898 | 3 | 3 | 10.32  | 96 |
| 50BC vs. 70B  | 89.41 | 48    | 41.41   | 4.898 | 3 | 3 | 11.96  | 96 |
| 50B vs. 60BC  | 101.3 | 71    | 30.33   | 4.898 | 3 | 3 | 8.759  | 96 |
| 50B vs. 60B   | 101.3 | 66    | 35.33   | 4.898 | 3 | 3 | 10.2   | 96 |
| 50B vs. 70BC  | 101.3 | 53.67 | 47.67   | 4.898 | 3 | 3 | 13.76  | 96 |
| 50B vs. 70B   | 101.3 | 48    | 53.33   | 4.898 | 3 | 3 | 15.4   | 96 |
| 60BC vs. 60B  | 71    | 66    | 5       | 4.898 | 3 | 3 | 1.444  | 96 |

|                      |       |       |       |       |   |   |       |    |
|----------------------|-------|-------|-------|-------|---|---|-------|----|
| <b>60BC vs. 70BC</b> | 71    | 53.67 | 17.33 | 4.898 | 3 | 3 | 5.005 | 96 |
| <b>60BC vs. 70B</b>  | 71    | 48    | 23    | 4.898 | 3 | 3 | 6.641 | 96 |
| <b>60B vs. 70BC</b>  | 66    | 53.67 | 12.33 | 4.898 | 3 | 3 | 3.561 | 96 |
| <b>60B vs. 70B</b>   | 66    | 48    | 18    | 4.898 | 3 | 3 | 5.197 | 96 |
| <b>70BC vs. 70B</b>  | 53.67 | 48    | 5.667 | 4.898 | 3 | 3 | 1.636 | 96 |

**Supplemental Table 3.** Two-way RM ANOVA and Tukey's multiple comparisons results (Figure 4C Study), n=3. All calculations were made in Graphpad Prism

## PNA Composite Activity Assay Statistical Analysis Tabular Results (Figure 5A Study)

| Table Analyzed                                                   | A.A. New             |                     |                 |                    |            |  |  |  |
|------------------------------------------------------------------|----------------------|---------------------|-----------------|--------------------|------------|--|--|--|
| <b>Two-way RM ANOVA</b>                                          | Matching: Across row |                     |                 |                    |            |  |  |  |
| <b>Alpha</b>                                                     | 0.05                 |                     |                 |                    |            |  |  |  |
| <b>Source of Variation</b>                                       | % of total variation | P value             | P value summary | Significant?       |            |  |  |  |
| <b>Interaction</b>                                               | 21.2                 | < 0.0001            | ****            | Yes                |            |  |  |  |
| <b>Composition</b>                                               | 52.47                | < 0.0001            | ****            | Yes                |            |  |  |  |
| <b>Concentration</b>                                             | 18.55                | < 0.0001            | ****            | Yes                |            |  |  |  |
| <b>Subjects (matching)</b>                                       | 5.328                | < 0.0001            | ****            | Yes                |            |  |  |  |
| <b>ANOVA table</b>                                               | SS                   | DF                  | MS              | F (DFn, DFd)       | P value    |  |  |  |
| <b>Interaction</b>                                               | 15.48                | 21                  | 0.7372          | F (21, 48) = 19.78 | P < 0.0001 |  |  |  |
| <b>Composition</b>                                               | 38.32                | 7                   | 5.474           | F (7, 16) = 22.51  | P < 0.0001 |  |  |  |
| <b>Concentration</b>                                             | 13.55                | 3                   | 4.515           | F (3, 48) = 121.1  | P < 0.0001 |  |  |  |
| <b>Subjects (matching)</b>                                       | 3.891                | 16                  | 0.2432          | F (16, 48) = 6.524 | P < 0.0001 |  |  |  |
| <b>Residual</b>                                                  | 1.789                | 48                  | 0.03728         |                    |            |  |  |  |
| <b>Multiple Comparisons</b>                                      |                      |                     |                 |                    |            |  |  |  |
| Within each column, compare rows (simple effects within columns) |                      |                     |                 |                    |            |  |  |  |
| <b>Number of families</b>                                        | 4                    |                     |                 |                    |            |  |  |  |
| <b>Number of comparisons per family</b>                          | 28                   |                     |                 |                    |            |  |  |  |
| <b>Alpha</b>                                                     | 0.05                 |                     |                 |                    |            |  |  |  |
| <b>Tukey's multiple comparisons test</b>                         | Mean Diff.           | 95% CI of diff.     | Significant?    | Summary            |            |  |  |  |
| <b>1 uM</b>                                                      |                      |                     |                 |                    |            |  |  |  |
| <b>20BC vs. 30BC</b>                                             | -2.517               | -3.279 to -1.755    | Yes             | ****               |            |  |  |  |
| <b>20BC vs. 40BC</b>                                             | -1.475               | -2.237 to -0.7123   | Yes             | ****               |            |  |  |  |
| <b>20BC vs. 50BC</b>                                             | -1.273               | -2.035 to -0.5109   | Yes             | ****               |            |  |  |  |
| <b>20BC vs. 60BC</b>                                             | 0.8776               | 0.1155 to 1.640     | Yes             | *                  |            |  |  |  |
| <b>20BC vs. 70BC</b>                                             | 0.9844               | 0.2223 to 1.747     | Yes             | **                 |            |  |  |  |
| <b>20BC vs. PSNP</b>                                             | 1.017                | 0.2545 to 1.779     | Yes             | **                 |            |  |  |  |
| <b>20BC vs. AMO</b>                                              | 0.1064               | -0.6558 to 0.8686   | No              | ns                 |            |  |  |  |
| <b>30BC vs. 40BC</b>                                             | 1.042                | 0.2802 to 1.805     | Yes             | **                 |            |  |  |  |
| <b>30BC vs. 50BC</b>                                             | 1.244                | 0.4816 to 2.006     | Yes             | ****               |            |  |  |  |
| <b>30BC vs. 60BC</b>                                             | 3.395                | 2.632 to 4.157      | Yes             | ****               |            |  |  |  |
| <b>30BC vs. 70BC</b>                                             | 3.501                | 2.739 to 4.264      | Yes             | ****               |            |  |  |  |
| <b>30BC vs. PSNP</b>                                             | 3.534                | 2.771 to 4.296      | Yes             | ****               |            |  |  |  |
| <b>30BC vs. AMO</b>                                              | 2.623                | 1.861 to 3.385      | Yes             | ****               |            |  |  |  |
| <b>40BC vs. 50BC</b>                                             | 0.2014               | -0.5608 to 0.9636   | No              | ns                 |            |  |  |  |
| <b>40BC vs. 60BC</b>                                             | 2.352                | 1.590 to 3.114      | Yes             | ****               |            |  |  |  |
| <b>40BC vs. 70BC</b>                                             | 2.459                | 1.697 to 3.221      | Yes             | ****               |            |  |  |  |
| <b>40BC vs. PSNP</b>                                             | 2.491                | 1.729 to 3.253      | Yes             | ****               |            |  |  |  |
| <b>40BC vs. AMO</b>                                              | 1.581                | 0.8188 to 2.343     | Yes             | ****               |            |  |  |  |
| <b>50BC vs. 60BC</b>                                             | 2.151                | 1.389 to 2.913      | Yes             | ****               |            |  |  |  |
| <b>50BC vs. 70BC</b>                                             | 2.258                | 1.495 to 3.020      | Yes             | ****               |            |  |  |  |
| <b>50BC vs. PSNP</b>                                             | 2.29                 | 1.528 to 3.052      | Yes             | ****               |            |  |  |  |
| <b>50BC vs. AMO</b>                                              | 1.38                 | 0.6174 to 2.142     | Yes             | ****               |            |  |  |  |
| <b>60BC vs. 70BC</b>                                             | 0.1068               | -0.6554 to 0.8690   | No              | ns                 |            |  |  |  |
| <b>60BC vs. PSNP</b>                                             | 0.139                | -0.6232 to 0.9012   | No              | ns                 |            |  |  |  |
| <b>60BC vs. AMO</b>                                              | -0.7712              | -1.533 to -0.009059 | Yes             | *                  |            |  |  |  |
| <b>70BC vs. PSNP</b>                                             | 0.0322               | -0.7300 to 0.7944   | No              | ns                 |            |  |  |  |
| <b>70BC vs. AMO</b>                                              | -0.878               | -1.640 to -0.1159   | Yes             | *                  |            |  |  |  |
| <b>PSNP vs. AMO</b>                                              | -0.9102              | -1.672 to -0.1481   | Yes             | **                 |            |  |  |  |
| <b>0.5 uM</b>                                                    |                      |                     |                 |                    |            |  |  |  |

|                |          |                    |     |      |  |  |  |  |
|----------------|----------|--------------------|-----|------|--|--|--|--|
| 20BC vs. 30BC  | -1.091   | -1.854 to -0.3292  | Yes | ***  |  |  |  |  |
| 20BC vs. 40BC  | -0.6064  | -1.369 to 0.1558   | No  | ns   |  |  |  |  |
| 20BC vs. 50BC  | -0.7963  | -1.558 to -0.03408 | Yes | *    |  |  |  |  |
| 20BC vs. 60BC  | 0.4448   | -0.3173 to 1.207   | No  | ns   |  |  |  |  |
| 20BC vs. 70BC  | 0.5168   | -0.2454 to 1.279   | No  | ns   |  |  |  |  |
| 20BC vs. PSNP  | 0.5401   | -0.2221 to 1.302   | No  | ns   |  |  |  |  |
| 20BC vs. AMO   | -0.3871  | -1.149 to 0.3751   | No  | ns   |  |  |  |  |
| 30BC vs. 40BC  | 0.485    | -0.2772 to 1.247   | No  | ns   |  |  |  |  |
| 30BC vs. 50BC  | 0.2951   | -0.4671 to 1.057   | No  | ns   |  |  |  |  |
| 30BC vs. 60BC  | 1.536    | 0.7740 to 2.298    | Yes | **** |  |  |  |  |
| 30BC vs. 70BC  | 1.608    | 0.8460 to 2.370    | Yes | **** |  |  |  |  |
| 30BC vs. PSNP  | 1.631    | 0.8693 to 2.394    | Yes | **** |  |  |  |  |
| 30BC vs. AMO   | 0.7043   | -0.05787 to 1.466  | No  | ns   |  |  |  |  |
| 40BC vs. 50BC  | -0.1899  | -0.9520 to 0.5723  | No  | ns   |  |  |  |  |
| 40BC vs. 60BC  | 1.051    | 0.2891 to 1.813    | Yes | **   |  |  |  |  |
| 40BC vs. 70BC  | 1.123    | 0.3610 to 1.885    | Yes | ***  |  |  |  |  |
| 40BC vs. PSNP  | 1.146    | 0.3843 to 1.909    | Yes | ***  |  |  |  |  |
| 40BC vs. AMO   | 0.2193   | -0.5428 to 0.9815  | No  | ns   |  |  |  |  |
| 50BC vs. 60BC  | 1.241    | 0.4789 to 2.003    | Yes | **** |  |  |  |  |
| 50BC vs. 70BC  | 1.313    | 0.5509 to 2.075    | Yes | **** |  |  |  |  |
| 50BC vs. PSNP  | 1.336    | 0.5742 to 2.098    | Yes | **** |  |  |  |  |
| 50BC vs. AMO   | 0.4092   | -0.3530 to 1.171   | No  | ns   |  |  |  |  |
| 60BC vs. 70BC  | 0.07195  | -0.6902 to 0.8341  | No  | ns   |  |  |  |  |
| 60BC vs. PSNP  | 0.09523  | -0.6669 to 0.8574  | No  | ns   |  |  |  |  |
| 60BC vs. AMO   | -0.8319  | -1.594 to -0.06973 | Yes | *    |  |  |  |  |
| 70BC vs. PSNP  | 0.02327  | -0.7389 to 0.7854  | No  | ns   |  |  |  |  |
| 70BC vs. AMO   | -0.9039  | -1.666 to -0.1417  | Yes | **   |  |  |  |  |
| PSNP vs. AMO   | -0.9271  | -1.689 to -0.1650  | Yes | **   |  |  |  |  |
| <b>0.25 uM</b> |          |                    |     |      |  |  |  |  |
| 20BC vs. 30BC  | -0.9434  | -1.706 to -0.1812  | Yes | **   |  |  |  |  |
| 20BC vs. 40BC  | -0.2956  | -1.058 to 0.4666   | No  | ns   |  |  |  |  |
| 20BC vs. 50BC  | -0.3552  | -1.117 to 0.4069   | No  | ns   |  |  |  |  |
| 20BC vs. 60BC  | 0.3508   | -0.4113 to 1.113   | No  | ns   |  |  |  |  |
| 20BC vs. 70BC  | 0.4478   | -0.3143 to 1.210   | No  | ns   |  |  |  |  |
| 20BC vs. PSNP  | 0.3655   | -0.3967 to 1.128   | No  | ns   |  |  |  |  |
| 20BC vs. AMO   | -0.5772  | -1.339 to 0.1850   | No  | ns   |  |  |  |  |
| 30BC vs. 40BC  | 0.6478   | -0.1143 to 1.410   | No  | ns   |  |  |  |  |
| 30BC vs. 50BC  | 0.5882   | -0.1740 to 1.350   | No  | ns   |  |  |  |  |
| 30BC vs. 60BC  | 1.294    | 0.5321 to 2.056    | Yes | **** |  |  |  |  |
| 30BC vs. 70BC  | 1.391    | 0.6291 to 2.153    | Yes | **** |  |  |  |  |
| 30BC vs. PSNP  | 1.309    | 0.5467 to 2.071    | Yes | **** |  |  |  |  |
| 30BC vs. AMO   | 0.3662   | -0.3960 to 1.128   | No  | ns   |  |  |  |  |
| 40BC vs. 50BC  | -0.05966 | -0.8218 to 0.7025  | No  | ns   |  |  |  |  |
| 40BC vs. 60BC  | 0.6464   | -0.1158 to 1.409   | No  | ns   |  |  |  |  |
| 40BC vs. 70BC  | 0.7434   | -0.01878 to 1.506  | No  | ns   |  |  |  |  |
| 40BC vs. PSNP  | 0.6611   | -0.1011 to 1.423   | No  | ns   |  |  |  |  |
| 40BC vs. AMO   | -0.2817  | -1.044 to 0.4805   | No  | ns   |  |  |  |  |

|                     |          |                    |            |             |    |    |   |    |
|---------------------|----------|--------------------|------------|-------------|----|----|---|----|
| 50BC vs. 60BC       | 0.7061   | -0.05610 to 1.468  | No         | ns          |    |    |   |    |
| 50BC vs. 70BC       | 0.8031   | 0.04089 to 1.565   | Yes        | *           |    |    |   |    |
| 50BC vs. PSNP       | 0.7207   | -0.04145 to 1.483  | No         | ns          |    |    |   |    |
| 50BC vs. AMO        | -0.222   | -0.9842 to 0.5402  | No         | ns          |    |    |   |    |
| 60BC vs. 70BC       | 0.09699  | -0.6652 to 0.8592  | No         | ns          |    |    |   |    |
| 60BC vs. PSNP       | 0.01465  | -0.7475 to 0.7768  | No         | ns          |    |    |   |    |
| 60BC vs. AMO        | -0.9281  | -1.690 to -0.1659  | Yes        | **          |    |    |   |    |
| 70BC vs. PSNP       | -0.08233 | -0.8445 to 0.6798  | No         | ns          |    |    |   |    |
| 70BC vs. AMO        | -1.025   | -1.787 to -0.2629  | Yes        | **          |    |    |   |    |
| PSNP vs. AMO        | -0.9427  | -1.705 to -0.1805  | Yes        | **          |    |    |   |    |
| <b>0.125 uM</b>     |          |                    |            |             |    |    |   |    |
| 20BC vs. 30BC       | -0.7118  | -1.474 to 0.05039  | No         | ns          |    |    |   |    |
| 20BC vs. 40BC       | -0.01565 | -0.7778 to 0.7465  | No         | ns          |    |    |   |    |
| 20BC vs. 50BC       | -0.1152  | -0.8774 to 0.6470  | No         | ns          |    |    |   |    |
| 20BC vs. 60BC       | 0.1456   | -0.6166 to 0.9078  | No         | ns          |    |    |   |    |
| 20BC vs. 70BC       | 0.266    | -0.4961 to 1.028   | No         | ns          |    |    |   |    |
| 20BC vs. PSNP       | 0.1948   | -0.5674 to 0.9569  | No         | ns          |    |    |   |    |
| 20BC vs. AMO        | -0.7085  | -1.471 to 0.05371  | No         | ns          |    |    |   |    |
| 30BC vs. 40BC       | 0.6961   | 0.03803 to 1.354   | Yes        | *           |    |    |   |    |
| 30BC vs. 50BC       | 0.5966   | -0.1656 to 1.359   | No         | ns          |    |    |   |    |
| 30BC vs. 60BC       | 0.8574   | 0.09519 to 1.620   | Yes        | *           |    |    |   |    |
| 30BC vs. 70BC       | 0.9778   | 0.2156 to 1.740    | Yes        | **          |    |    |   |    |
| 30BC vs. PSNP       | 0.9065   | 0.1444 to 1.669    | Yes        | **          |    |    |   |    |
| 30BC vs. AMO        | 0.003311 | -0.7589 to 0.7655  | No         | ns          |    |    |   |    |
| 40BC vs. 50BC       | -0.09954 | -0.8617 to 0.6626  | No         | ns          |    |    |   |    |
| 40BC vs. 60BC       | 0.1612   | -0.6009 to 0.9234  | No         | ns          |    |    |   |    |
| 40BC vs. 70BC       | 0.2817   | -0.4805 to 1.044   | No         | ns          |    |    |   |    |
| 40BC vs. PSNP       | 0.2104   | -0.5518 to 0.9726  | No         | ns          |    |    |   |    |
| 40BC vs. AMO        | -0.6928  | -1.455 to 0.06936  | No         | ns          |    |    |   |    |
| 50BC vs. 60BC       | 0.2608   | -0.5014 to 1.023   | No         | ns          |    |    |   |    |
| 50BC vs. 70BC       | 0.3812   | -0.3809 to 1.143   | No         | ns          |    |    |   |    |
| 50BC vs. PSNP       | 0.31     | -0.4522 to 1.072   | No         | ns          |    |    |   |    |
| 50BC vs. AMO        | -0.5933  | -1.355 to 0.1689   | No         | ns          |    |    |   |    |
| 60BC vs. 70BC       | 0.1205   | -0.6417 to 0.8826  | No         | ns          |    |    |   |    |
| 60BC vs. PSNP       | 0.04917  | -0.7130 to 0.8113  | No         | ns          |    |    |   |    |
| 60BC vs. AMO        | -0.8541  | -1.616 to -0.09188 | Yes        | *           |    |    |   |    |
| 70BC vs. PSNP       | -0.07128 | -0.8335 to 0.6909  | No         | ns          |    |    |   |    |
| 70BC vs. AMO        | -0.9745  | -1.737 to -0.2123  | Yes        | **          |    |    |   |    |
| PSNP vs. AMO        | -0.9032  | -1.665 to -0.1411  | Yes        | **          |    |    |   |    |
| <b>Test details</b> |          |                    |            |             |    |    |   |    |
|                     | Mean 1   | Mean 2             | Mean Diff. | SE of diff. | N1 | N2 | q | DF |
| <b>1 uM</b>         |          |                    |            |             |    |    |   |    |



|               |         |         |         |        |   |   |              |    |
|---------------|---------|---------|---------|--------|---|---|--------------|----|
| 20BC vs. 30BC | 1.106   | 3.623   | -2.517  | 0.2432 | 3 | 3 | 14.6<br>3    | 64 |
| 20BC vs. 40BC | 1.106   | 2.581   | -1.475  | 0.2432 | 3 | 3 | 8.57<br>3    | 64 |
| 20BC vs. 50BC | 1.106   | 2.38    | -1.273  | 0.2432 | 3 | 3 | 7.40<br>2    | 64 |
| 20BC vs. 60BC | 1.106   | 0.2288  | 0.8776  | 0.2432 | 3 | 3 | 5.10<br>3    | 64 |
| 20BC vs. 70BC | 1.106   | 0.122   | 0.9844  | 0.2432 | 3 | 3 | 5.72<br>4    | 64 |
| 20BC vs. PSNP | 1.106   | 0.08977 | 1.017   | 0.2432 | 3 | 3 | 5.91<br>1    | 64 |
| 20BC vs. AMO  | 1.106   | 1       | 0.1064  | 0.2432 | 3 | 3 | 0.61<br>87   | 64 |
| 30BC vs. 40BC | 3.623   | 2.581   | 1.042   | 0.2432 | 3 | 3 | 6.06<br>7.23 | 64 |
| 30BC vs. 50BC | 3.623   | 2.38    | 1.244   | 0.2432 | 3 | 3 | 19.7<br>4    | 64 |
| 30BC vs. 60BC | 3.623   | 0.2288  | 3.395   | 0.2432 | 3 | 3 | 20.3<br>6    | 64 |
| 30BC vs. 70BC | 3.623   | 0.122   | 3.501   | 0.2432 | 3 | 3 | 20.5<br>4    | 64 |
| 30BC vs. PSNP | 3.623   | 0.08977 | 3.534   | 0.2432 | 3 | 3 | 15.2<br>5    | 64 |
| 30BC vs. AMO  | 3.623   | 1       | 2.623   | 0.2432 | 3 | 3 | 1.17<br>1    | 64 |
| 40BC vs. 50BC | 2.581   | 2.38    | 0.2014  | 0.2432 | 3 | 3 | 13.6<br>8    | 64 |
| 40BC vs. 60BC | 2.581   | 0.2288  | 2.352   | 0.2432 | 3 | 3 | 14.3<br>8    | 64 |
| 40BC vs. 70BC | 2.581   | 0.122   | 2.459   | 0.2432 | 3 | 3 | 14.4<br>8    | 64 |
| 40BC vs. PSNP | 2.581   | 0.08977 | 2.491   | 0.2432 | 3 | 3 | 9.19<br>1    | 64 |
| 40BC vs. AMO  | 2.581   | 1       | 1.581   | 0.2432 | 3 | 3 | 12.5<br>3    | 64 |
| 50BC vs. 60BC | 2.38    | 0.2288  | 2.151   | 0.2432 | 3 | 3 | 13.1<br>3    | 64 |
| 50BC vs. 70BC | 2.38    | 0.122   | 2.258   | 0.2432 | 3 | 3 | 13.3<br>1    | 64 |
| 50BC vs. PSNP | 2.38    | 0.08977 | 2.29    | 0.2432 | 3 | 3 | 8.02<br>1    | 64 |
| 50BC vs. AMO  | 2.38    | 1       | 1.38    | 0.2432 | 3 | 3 | 0.62<br>09   | 64 |
| 60BC vs. 70BC | 0.2288  | 0.122   | 0.1068  | 0.2432 | 3 | 3 | 0.80<br>81   | 64 |
| 60BC vs. PSNP | 0.2288  | 0.08977 | 0.139   | 0.2432 | 3 | 3 | 4.48<br>4    | 64 |
| 60BC vs. AMO  | 0.2288  | 1       | -0.7712 | 0.2432 | 3 | 3 | 0.18<br>72   | 64 |
| 70BC vs. PSNP | 0.122   | 0.08977 | 0.0322  | 0.2432 | 3 | 3 | 5.10<br>5    | 64 |
| 70BC vs. AMO  | 0.122   | 1       | -0.878  | 0.2432 | 3 | 3 | 5.29<br>2    | 64 |
| PSNP vs. AMO  | 0.08977 | 1       | -0.9102 | 0.2432 | 3 | 3 |              | 64 |
| 0.5 uM        |         |         |         |        |   |   |              |    |
| 20BC vs. 30BC | 0.6129  | 1.704   | -1.091  | 0.2432 | 3 | 3 | 6.34<br>5    | 64 |
| 20BC vs. 40BC | 0.6129  | 1.219   | -0.6064 | 0.2432 | 3 | 3 | 3.52<br>6    | 64 |
| 20BC vs. 50BC | 0.6129  | 1.409   | -0.7963 | 0.2432 | 3 | 3 | 4.62<br>9    | 64 |
| 20BC vs. 60BC | 0.6129  | 0.1681  | 0.4448  | 0.2432 | 3 | 3 | 2.58<br>6    | 64 |
| 20BC vs. 70BC | 0.6129  | 0.09615 | 0.5168  | 0.2432 | 3 | 3 | 3.00<br>5    | 64 |
| 20BC vs. PSNP | 0.6129  | 0.07288 | 0.5401  | 0.2432 | 3 | 3 | 3.14<br>9.48 | 64 |
| 20BC vs. AMO  | 0.6129  | 1       | -0.3871 | 0.2432 | 3 | 3 | 2.25<br>5    | 64 |
| 30BC vs. 40BC | 1.704   | 1.219   | 0.485   | 0.2432 | 3 | 3 | 2.82<br>6    | 64 |
| 30BC vs. 50BC | 1.704   | 1.409   | 0.2951  | 0.2432 | 3 | 3 | 8.93<br>1    | 64 |
| 30BC vs. 60BC | 1.704   | 0.1681  | 1.536   | 0.2432 | 3 | 3 | 9.35<br>9.48 | 64 |
| 30BC vs. 70BC | 1.704   | 0.09615 | 1.608   | 0.2432 | 3 | 3 | 4.09<br>5    | 64 |
| 30BC vs. PSNP | 1.704   | 0.07288 | 1.631   | 0.2432 | 3 | 3 | 1.10<br>4    | 64 |
| 30BC vs. AMO  | 1.704   | 1       | 0.7043  | 0.2432 | 3 | 3 | 6.11<br>2    | 64 |
| 40BC vs. 50BC | 1.219   | 1.409   | -0.1899 | 0.2432 | 3 | 3 | 6.53<br>64   | 64 |
| 40BC vs. 60BC | 1.219   | 0.1681  | 1.051   | 0.2432 | 3 | 3 |              | 64 |
| 40BC vs. 70BC | 1.219   | 0.09615 | 1.123   | 0.2432 | 3 | 3 |              | 64 |

|               |          |          |          |        |   |   |        |    |
|---------------|----------|----------|----------|--------|---|---|--------|----|
| 40BC vs. PSNP | 1.219    | 0.07288  | 1.146    | 0.2432 | 3 | 3 | 6.665  | 64 |
| 40BC vs. AMO  | 1.219    | 1        | 0.2193   | 0.2432 | 3 | 3 | 1.275  | 64 |
| 50BC vs. 60BC | 1.409    | 0.1681   | 1.241    | 0.2432 | 3 | 3 | 7.216  | 64 |
| 50BC vs. 70BC | 1.409    | 0.09615  | 1.313    | 0.2432 | 3 | 3 | 7.634  | 64 |
| 50BC vs. PSNP | 1.409    | 0.07288  | 1.336    | 0.2432 | 3 | 3 | 7.769  | 64 |
| 50BC vs. AMO  | 1.409    | 1        | 0.4092   | 0.2432 | 3 | 3 | 2.379  | 64 |
| 60BC vs. 70BC | 0.1681   | 0.09615  | 0.07195  | 0.2432 | 3 | 3 | 0.4183 | 64 |
| 60BC vs. PSNP | 0.1681   | 0.07288  | 0.09523  | 0.2432 | 3 | 3 | 0.5536 | 64 |
| 60BC vs. AMO  | 0.1681   | 1        | -0.8319  | 0.2432 | 3 | 3 | 4.837  | 64 |
| 70BC vs. PSNP | 0.09615  | 0.07288  | 0.02327  | 0.2432 | 3 | 3 | 0.1353 | 64 |
| 70BC vs. AMO  | 0.09615  | 1        | -0.9039  | 0.2432 | 3 | 3 | 5.255  | 64 |
| PSNP vs. AMO  | 0.07288  | 1        | -0.9271  | 0.2432 | 3 | 3 | 5.39   | 64 |
| 0.25 uM       |          |          |          |        |   |   |        |    |
| 20BC vs. 30BC | 0.4228   | 1.366    | -0.9434  | 0.2432 | 3 | 3 | 5.485  | 64 |
| 20BC vs. 40BC | 0.4228   | 0.7183   | -0.2956  | 0.2432 | 3 | 3 | 1.718  | 64 |
| 20BC vs. 50BC | 0.4228   | 0.778    | -0.3552  | 0.2432 | 3 | 3 | 2.065  | 64 |
| 20BC vs. 60BC | 0.4228   | 0.07194  | 0.3508   | 0.2432 | 3 | 3 | 2.04   | 64 |
| 20BC vs. 70BC | 0.4228   | -0.02505 | 0.4478   | 0.2432 | 3 | 3 | 2.604  | 64 |
| 20BC vs. PSNP | 0.4228   | 0.05728  | 0.3655   | 0.2432 | 3 | 3 | 2.125  | 64 |
| 20BC vs. AMO  | 0.4228   | 1        | -0.5772  | 0.2432 | 3 | 3 | 3.356  | 64 |
| 30BC vs. 40BC | 1.366    | 0.7183   | 0.6478   | 0.2432 | 3 | 3 | 3.766  | 64 |
| 30BC vs. 50BC | 1.366    | 0.778    | 0.5882   | 0.2432 | 3 | 3 | 3.42   | 64 |
| 30BC vs. 60BC | 1.366    | 0.07194  | 1.294    | 0.2432 | 3 | 3 | 7.525  | 64 |
| 30BC vs. 70BC | 1.366    | -0.02505 | 1.391    | 0.2432 | 3 | 3 | 8.089  | 64 |
| 30BC vs. PSNP | 1.366    | 0.05728  | 1.309    | 0.2432 | 3 | 3 | 7.61   | 64 |
| 30BC vs. AMO  | 1.366    | 1        | 0.3662   | 0.2432 | 3 | 3 | 2.129  | 64 |
| 40BC vs. 50BC | 0.7183   | 0.778    | -0.05966 | 0.2432 | 3 | 3 | 0.3469 | 64 |
| 40BC vs. 60BC | 0.7183   | 0.07194  | 0.6464   | 0.2432 | 3 | 3 | 3.758  | 64 |
| 40BC vs. 70BC | 0.7183   | -0.02505 | 0.7434   | 0.2432 | 3 | 3 | 4.322  | 64 |
| 40BC vs. PSNP | 0.7183   | 0.05728  | 0.6611   | 0.2432 | 3 | 3 | 3.843  | 64 |
| 40BC vs. AMO  | 0.7183   | 1        | -0.2817  | 0.2432 | 3 | 3 | 1.638  | 64 |
| 50BC vs. 60BC | 0.778    | 0.07194  | 0.7061   | 0.2432 | 3 | 3 | 4.105  | 64 |
| 50BC vs. 70BC | 0.778    | -0.02505 | 0.8031   | 0.2432 | 3 | 3 | 4.669  | 64 |
| 50BC vs. PSNP | 0.778    | 0.05728  | 0.7207   | 0.2432 | 3 | 3 | 4.19   | 64 |
| 50BC vs. AMO  | 0.778    | 1        | -0.222   | 0.2432 | 3 | 3 | 1.291  | 64 |
| 60BC vs. 70BC | 0.07194  | -0.02505 | 0.09699  | 0.2432 | 3 | 3 | 0.5639 | 64 |
| 60BC vs. PSNP | 0.07194  | 0.05728  | 0.01465  | 0.2432 | 3 | 3 | 0.0852 | 64 |
| 60BC vs. AMO  | 0.07194  | 1        | -0.9281  | 0.2432 | 3 | 3 | 5.396  | 64 |
| 70BC vs. PSNP | -0.02505 | 0.05728  | -0.08233 | 0.2432 | 3 | 3 | 0.4787 | 64 |
| 70BC vs. AMO  | -0.02505 | 1        | -1.025   | 0.2432 | 3 | 3 | 5.96   | 64 |
| PSNP vs. AMO  | 0.05728  | 1        | -0.9427  | 0.2432 | 3 | 3 | 5.481  | 64 |
| 0.125 uM      |          |          |          |        |   |   |        |    |
| 20BC vs. 30BC | 0.2915   | 1.003    | -0.7118  | 0.2432 | 3 | 3 | 4.138  | 64 |
| 20BC vs. 40BC | 0.2915   | 0.3072   | -0.01565 | 0.2432 | 3 | 3 | 0.091  | 64 |

|               |         |         |          |        |   |   |             |    |
|---------------|---------|---------|----------|--------|---|---|-------------|----|
| 20BC vs. 50BC | 0.2915  | 0.4067  | -0.1152  | 0.2432 | 3 | 3 | 0.66<br>97  | 64 |
| 20BC vs. 60BC | 0.2915  | 0.1459  | 0.1456   | 0.2432 | 3 | 3 | 0.84<br>64  | 64 |
| 20BC vs. 70BC | 0.2915  | 0.02549 | 0.266    | 0.2432 | 3 | 3 | 1.54<br>7   | 64 |
| 20BC vs. PSNP | 0.2915  | 0.09678 | 0.1948   | 0.2432 | 3 | 3 | 1.13<br>2   | 64 |
| 20BC vs. AMO  | 0.2915  | 1       | -0.7085  | 0.2432 | 3 | 3 | 4.11<br>9   | 64 |
| 30BC vs. 40BC | 1.003   | 0.3072  | 0.6961   | 0.2432 | 3 | 3 | 4.04<br>7   | 64 |
| 30BC vs. 50BC | 1.003   | 0.4067  | 0.5966   | 0.2432 | 3 | 3 | 3.46<br>9   | 64 |
| 30BC vs. 60BC | 1.003   | 0.1459  | 0.8574   | 0.2432 | 3 | 3 | 4.98<br>5   | 64 |
| 30BC vs. 70BC | 1.003   | 0.02549 | 0.9778   | 0.2432 | 3 | 3 | 5.68<br>5   | 64 |
| 30BC vs. PSNP | 1.003   | 0.09678 | 0.9065   | 0.2432 | 3 | 3 | 5.27<br>1   | 64 |
| 30BC vs. AMO  | 1.003   | 1       | 0.003311 | 0.2432 | 3 | 3 | 0.01<br>925 | 64 |
| 40BC vs. 50BC | 0.3072  | 0.4067  | -0.09954 | 0.2432 | 3 | 3 | 0.57<br>87  | 64 |
| 40BC vs. 60BC | 0.3072  | 0.1459  | 0.1612   | 0.2432 | 3 | 3 | 0.93<br>74  | 64 |
| 40BC vs. 70BC | 0.3072  | 0.02549 | 0.2817   | 0.2432 | 3 | 3 | 1.63<br>8   | 64 |
| 40BC vs. PSNP | 0.3072  | 0.09678 | 0.2104   | 0.2432 | 3 | 3 | 1.22<br>3   | 64 |
| 40BC vs. AMO  | 0.3072  | 1       | -0.6928  | 0.2432 | 3 | 3 | 4.02<br>8   | 64 |
| 50BC vs. 60BC | 0.4067  | 0.1459  | 0.2608   | 0.2432 | 3 | 3 | 1.51<br>6   | 64 |
| 50BC vs. 70BC | 0.4067  | 0.02549 | 0.3812   | 0.2432 | 3 | 3 | 2.21<br>6   | 64 |
| 50BC vs. PSNP | 0.4067  | 0.09678 | 0.31     | 0.2432 | 3 | 3 | 1.80<br>2   | 64 |
| 50BC vs. AMO  | 0.4067  | 1       | -0.5933  | 0.2432 | 3 | 3 | 3.44<br>9   | 64 |
| 60BC vs. 70BC | 0.1459  | 0.02549 | 0.1205   | 0.2432 | 3 | 3 | 0.70<br>03  | 64 |
| 60BC vs. PSNP | 0.1459  | 0.09678 | 0.04917  | 0.2432 | 3 | 3 | 0.28<br>59  | 64 |
| 60BC vs. AMO  | 0.1459  | 1       | -0.8541  | 0.2432 | 3 | 3 | 4.96<br>5   | 64 |
| 70BC vs. PSNP | 0.02549 | 0.09678 | -0.07128 | 0.2432 | 3 | 3 | 0.41<br>44  | 64 |
| 70BC vs. AMO  | 0.02549 | 1       | -0.9745  | 0.2432 | 3 | 3 | 5.66<br>6   | 64 |
| PSNP vs. AMO  | 0.09678 | 1       | -0.9032  | 0.2432 | 3 | 3 | 5.25<br>1   | 64 |

**Supplemental Table 4.** Two-way RM ANOVA and Tukey's multiple comparisons results for Figure 5A Study, n=3. All calculations were made in Graphpad Prism.

### Cytotoxicity Statistical Analysis Tabular Results (Figure 5B Study)

|                     |                      |         |                 |              |  |  |  |  |
|---------------------|----------------------|---------|-----------------|--------------|--|--|--|--|
| Table Analyzed      | Cyto New             |         |                 |              |  |  |  |  |
| Two-way RM ANOVA    | Matching: Across row |         |                 |              |  |  |  |  |
| Alpha               | 0.05                 |         |                 |              |  |  |  |  |
| Source of Variation | % of total variation | P value | P value summary | Significant? |  |  |  |  |
| Interaction         | 16.95                | 0.7686  | ns              | No           |  |  |  |  |

|                          |           |           |           |                     |                |  |  |  |
|--------------------------|-----------|-----------|-----------|---------------------|----------------|--|--|--|
| composition              | 19.03     | 0.0059    | **        | Yes                 |                |  |  |  |
| Concentration            | 0.5468    | 0.9355    | ns        | No                  |                |  |  |  |
| Subjects (matching)      | 8.794     | 0.9299    | ns        | No                  |                |  |  |  |
|                          |           |           |           |                     |                |  |  |  |
| <b>ANOVA table</b>       | <b>SS</b> | <b>DF</b> | <b>MS</b> | <b>F (DFn, DFd)</b> | <b>P value</b> |  |  |  |
| Interaction              | 6319      | 18        | 351       | F (18, 42) = 0.7233 | P = 0.7686     |  |  |  |
| composition              | 7096      | 6         | 1183      | F (6, 14) = 5.050   | P = 0.0059     |  |  |  |
| Concentration            | 203.8     | 3         | 67.95     | F (3, 42) = 0.1400  | P = 0.9355     |  |  |  |
| Subjects (matching)      | 3279      | 14        | 234.2     | F (14, 42) = 0.4825 | P = 0.9299     |  |  |  |
| Residual                 | 20385     | 42        | 485.3     |                     |                |  |  |  |
|                          |           |           |           |                     |                |  |  |  |
| Number of missing values | 0         |           |           |                     |                |  |  |  |

### Multiple Comparisons

|                                                                  |                   |                        |                     |                |  |  |  |  |
|------------------------------------------------------------------|-------------------|------------------------|---------------------|----------------|--|--|--|--|
| Within each column, compare rows (simple effects within columns) |                   |                        |                     |                |  |  |  |  |
| Number of families                                               | 4                 |                        |                     |                |  |  |  |  |
| Number of comparisons per family                                 | 21                |                        |                     |                |  |  |  |  |
| Alpha                                                            | 0.05              |                        |                     |                |  |  |  |  |
|                                                                  |                   |                        |                     |                |  |  |  |  |
| <b>Tukey's multiple comparisons test</b>                         | <b>Mean Diff.</b> | <b>95% CI of diff.</b> | <b>Significant?</b> | <b>Summary</b> |  |  |  |  |
|                                                                  |                   |                        |                     |                |  |  |  |  |
| <b>1 uM</b>                                                      |                   |                        |                     |                |  |  |  |  |
| 20BC vs. 30BC                                                    | 18                | -33.33 to 69.33        | No                  | ns             |  |  |  |  |
| 20BC vs. 40BC                                                    | 12.67             | -38.66 to 63.99        | No                  | ns             |  |  |  |  |
| 20BC vs. 50BC                                                    | -15.33            | -66.66 to 35.99        | No                  | ns             |  |  |  |  |
| 20BC vs. 60BC                                                    | -17.33            | -68.66 to 33.99        | No                  | ns             |  |  |  |  |
| 20BC vs. 70BC                                                    | -24.67            | -75.99 to 26.66        | No                  | ns             |  |  |  |  |
| 20BC vs. PSNP                                                    | -20.33            | -71.66 to 30.99        | No                  | ns             |  |  |  |  |
| 30BC vs. 40BC                                                    | -5.333            | -56.66 to 45.99        | No                  | ns             |  |  |  |  |
| 30BC vs. 50BC                                                    | -33.33            | -84.66 to 17.99        | No                  | ns             |  |  |  |  |
| 30BC vs. 60BC                                                    | -35.33            | -86.66 to 15.99        | No                  | ns             |  |  |  |  |
| 30BC vs. 70BC                                                    | -42.67            | -93.99 to 8.659        | No                  | ns             |  |  |  |  |
| 30BC vs. PSNP                                                    | -38.33            | -89.66 to 12.99        | No                  | ns             |  |  |  |  |
| 40BC vs. 50BC                                                    | -28               | -79.33 to 23.33        | No                  | ns             |  |  |  |  |
| 40BC vs. 60BC                                                    | -30               | -81.33 to 21.33        | No                  | ns             |  |  |  |  |
| 40BC vs. 70BC                                                    | -37.33            | -88.66 to 13.99        | No                  | ns             |  |  |  |  |
| 40BC vs. PSNP                                                    | -33               | -84.33 to 18.33        | No                  | ns             |  |  |  |  |
| 50BC vs. 60BC                                                    | -2                | -53.33 to 49.33        | No                  | ns             |  |  |  |  |
| 50BC vs. 70BC                                                    | -9.333            | -60.66 to 41.99        | No                  | ns             |  |  |  |  |
| 50BC vs. PSNP                                                    | -5                | -56.33 to 46.33        | No                  | ns             |  |  |  |  |
| 60BC vs. 70BC                                                    | -7.333            | -58.66 to 43.99        | No                  | ns             |  |  |  |  |
| 60BC vs. PSNP                                                    | -3                | -54.33 to 48.33        | No                  | ns             |  |  |  |  |
| 70BC vs. PSNP                                                    | 4.333             | -46.99 to 55.66        | No                  | ns             |  |  |  |  |
|                                                                  |                   |                        |                     |                |  |  |  |  |
| <b>0.5 uM</b>                                                    |                   |                        |                     |                |  |  |  |  |
| 20BC vs. 30BC                                                    | 14.67             | -36.66 to 65.99        | No                  | ns             |  |  |  |  |
| 20BC vs. 40BC                                                    | 13.67             | -37.66 to 64.99        | No                  | ns             |  |  |  |  |

|                 |        |                 |    |    |  |  |  |  |
|-----------------|--------|-----------------|----|----|--|--|--|--|
| 20BC vs. 50BC   | 0      | -51.33 to 51.33 | No | ns |  |  |  |  |
| 20BC vs. 60BC   | -24    | -75.33 to 27.33 | No | ns |  |  |  |  |
| 20BC vs. 70BC   | -8.667 | -59.99 to 42.66 | No | ns |  |  |  |  |
| 20BC vs. PSNP   | -7.333 | -58.66 to 43.99 | No | ns |  |  |  |  |
| 30BC vs. 40BC   | -1     | -52.33 to 50.33 | No | ns |  |  |  |  |
| 30BC vs. 50BC   | -14.67 | -65.99 to 36.66 | No | ns |  |  |  |  |
| 30BC vs. 60BC   | -38.67 | -89.99 to 12.66 | No | ns |  |  |  |  |
| 30BC vs. 70BC   | -23.33 | -74.66 to 27.99 | No | ns |  |  |  |  |
| 30BC vs. PSNP   | -22    | -73.33 to 29.33 | No | ns |  |  |  |  |
| 40BC vs. 50BC   | -13.67 | -64.99 to 37.66 | No | ns |  |  |  |  |
| 40BC vs. 60BC   | -37.67 | -88.99 to 13.66 | No | ns |  |  |  |  |
| 40BC vs. 70BC   | -22.33 | -73.66 to 28.99 | No | ns |  |  |  |  |
| 40BC vs. PSNP   | -21    | -72.33 to 30.33 | No | ns |  |  |  |  |
| 50BC vs. 60BC   | -24    | -75.33 to 27.33 | No | ns |  |  |  |  |
| 50BC vs. 70BC   | -8.667 | -59.99 to 42.66 | No | ns |  |  |  |  |
| 50BC vs. PSNP   | -7.333 | -58.66 to 43.99 | No | ns |  |  |  |  |
| 60BC vs. 70BC   | 15.33  | -35.99 to 66.66 | No | ns |  |  |  |  |
| 60BC vs. PSNP   | 16.67  | -34.66 to 67.99 | No | ns |  |  |  |  |
| 70BC vs. PSNP   | 1.333  | -49.99 to 52.66 | No | ns |  |  |  |  |
| <b>0.25 uM</b>  |        |                 |    |    |  |  |  |  |
| 20BC vs. 30BC   | 19     | -32.33 to 70.33 | No | ns |  |  |  |  |
| 20BC vs. 40BC   | 8.333  | -42.99 to 59.66 | No | ns |  |  |  |  |
| 20BC vs. 50BC   | 1.333  | -49.99 to 52.66 | No | ns |  |  |  |  |
| 20BC vs. 60BC   | -22.33 | -73.66 to 28.99 | No | ns |  |  |  |  |
| 20BC vs. 70BC   | -8     | -59.33 to 43.33 | No | ns |  |  |  |  |
| 20BC vs. PSNP   | -6.667 | -57.99 to 44.66 | No | ns |  |  |  |  |
| 30BC vs. 40BC   | -10.67 | -61.99 to 40.66 | No | ns |  |  |  |  |
| 30BC vs. 50BC   | -17.67 | -68.99 to 33.66 | No | ns |  |  |  |  |
| 30BC vs. 60BC   | -41.33 | -92.66 to 9.993 | No | ns |  |  |  |  |
| 30BC vs. 70BC   | -27    | -78.33 to 24.33 | No | ns |  |  |  |  |
| 30BC vs. PSNP   | -25.67 | -76.99 to 25.66 | No | ns |  |  |  |  |
| 40BC vs. 50BC   | -7     | -58.33 to 44.33 | No | ns |  |  |  |  |
| 40BC vs. 60BC   | -30.67 | -81.99 to 20.66 | No | ns |  |  |  |  |
| 40BC vs. 70BC   | -16.33 | -67.66 to 34.99 | No | ns |  |  |  |  |
| 40BC vs. PSNP   | -15    | -66.33 to 36.33 | No | ns |  |  |  |  |
| 50BC vs. 60BC   | -23.67 | -74.99 to 27.66 | No | ns |  |  |  |  |
| 50BC vs. 70BC   | -9.333 | -60.66 to 41.99 | No | ns |  |  |  |  |
| 50BC vs. PSNP   | -8     | -59.33 to 43.33 | No | ns |  |  |  |  |
| 60BC vs. 70BC   | 14.33  | -36.99 to 65.66 | No | ns |  |  |  |  |
| 60BC vs. PSNP   | 15.67  | -35.66 to 66.99 | No | ns |  |  |  |  |
| 70BC vs. PSNP   | 1.333  | -49.99 to 52.66 | No | ns |  |  |  |  |
| <b>0.125 uM</b> |        |                 |    |    |  |  |  |  |

|               |         |                 |            |             |    |    |       |    |   |
|---------------|---------|-----------------|------------|-------------|----|----|-------|----|---|
| 20BC vs. 30BC | -8.333  | -59.66 to 42.99 | No         | ns          |    |    |       |    |   |
| 20BC vs. 40BC | -21     | -72.33 to 30.33 | No         | ns          |    |    |       |    |   |
| 20BC vs. 50BC | -19.33  | -70.66 to 31.99 | No         | ns          |    |    |       |    |   |
| 20BC vs. 60BC | 5       | -46.33 to 56.33 | No         | ns          |    |    |       |    |   |
| 20BC vs. 70BC | -11.67  | -62.99 to 39.66 | No         | ns          |    |    |       |    |   |
| 20BC vs. PSNP | -19.67  | -70.99 to 31.66 | No         | ns          |    |    |       |    |   |
| 30BC vs. 40BC | -12.67  | -63.99 to 38.66 | No         | ns          |    |    |       |    |   |
| 30BC vs. 50BC | -11     | -62.33 to 40.33 | No         | ns          |    |    |       |    |   |
| 30BC vs. 60BC | 13.33   | -37.99 to 64.66 | No         | ns          |    |    |       |    |   |
| 30BC vs. 70BC | -3.333  | -54.66 to 47.99 | No         | ns          |    |    |       |    |   |
| 30BC vs. PSNP | -11.33  | -62.66 to 39.99 | No         | ns          |    |    |       |    |   |
| 40BC vs. 50BC | 1.667   | -49.66 to 52.99 | No         | ns          |    |    |       |    |   |
| 40BC vs. 60BC | 26      | -25.33 to 77.33 | No         | ns          |    |    |       |    |   |
| 40BC vs. 70BC | 9.333   | -41.99 to 60.66 | No         | ns          |    |    |       |    |   |
| 40BC vs. PSNP | 1.333   | -49.99 to 52.66 | No         | ns          |    |    |       |    |   |
| 50BC vs. 60BC | 24.33   | -26.99 to 75.66 | No         | ns          |    |    |       |    |   |
| 50BC vs. 70BC | 7.667   | -43.66 to 58.99 | No         | ns          |    |    |       |    |   |
| 50BC vs. PSNP | -0.3333 | -51.66 to 50.99 | No         | ns          |    |    |       |    |   |
| 60BC vs. 70BC | -16.67  | -67.99 to 34.66 | No         | ns          |    |    |       |    |   |
| 60BC vs. PSNP | -24.67  | -75.99 to 26.66 | No         | ns          |    |    |       |    |   |
| 70BC vs. PSNP | -8      | -59.33 to 43.33 | No         | ns          |    |    |       |    |   |
|               |         |                 |            |             |    |    |       |    |   |
|               |         |                 |            |             |    |    |       |    |   |
|               |         |                 |            |             |    |    |       |    |   |
| Test details  | Mean 1  | Mean 2          | Mean Diff. | SE of diff. | N1 | N2 | q     | D  | F |
|               |         |                 |            |             |    |    |       |    |   |
| 1 uM          |         |                 |            |             |    |    |       |    |   |
| 20BC vs. 30BC | 79.67   | 61.67           | 18         | 16.78       | 3  | 3  | 1.517 | 56 |   |
| 20BC vs. 40BC | 79.67   | 67              | 12.67      | 16.78       | 3  | 3  | 1.067 | 56 |   |
| 20BC vs. 50BC | 79.67   | 95              | -15.33     | 16.78       | 3  | 3  | 1.292 | 56 |   |
| 20BC vs. 60BC | 79.67   | 97              | -17.33     | 16.78       | 3  | 3  | 1.46  | 56 |   |
| 20BC vs. 70BC | 79.67   | 104.3           | -24.67     | 16.78       | 3  | 3  | 2.078 | 56 |   |
| 20BC vs. PSNP | 79.67   | 100             | -20.33     | 16.78       | 3  | 3  | 1.713 | 56 |   |
|               |         |                 |            |             |    |    | 0.449 |    |   |
| 30BC vs. 40BC | 61.67   | 67              | -5.333     | 16.78       | 3  | 3  | 4     | 56 |   |
| 30BC vs. 50BC | 61.67   | 95              | -33.33     | 16.78       | 3  | 3  | 2.809 | 56 |   |
| 30BC vs. 60BC | 61.67   | 97              | -35.33     | 16.78       | 3  | 3  | 2.977 | 56 |   |
| 30BC vs. 70BC | 61.67   | 104.3           | -42.67     | 16.78       | 3  | 3  | 3.595 | 56 |   |
| 30BC vs. PSNP | 61.67   | 100             | -38.33     | 16.78       | 3  | 3  | 3.23  | 56 |   |
| 40BC vs. 50BC | 67      | 95              | -28        | 16.78       | 3  | 3  | 2.359 | 56 |   |
| 40BC vs. 60BC | 67      | 97              | -30        | 16.78       | 3  | 3  | 2.528 | 56 |   |
| 40BC vs. 70BC | 67      | 104.3           | -37.33     | 16.78       | 3  | 3  | 3.146 | 56 |   |
| 40BC vs. PSNP | 67      | 100             | -33        | 16.78       | 3  | 3  | 2.781 | 56 |   |
|               |         |                 |            |             |    |    | 0.168 |    |   |
| 50BC vs. 60BC | 95      | 97              | -2         | 16.78       | 3  | 3  | 5     | 56 |   |
|               |         |                 |            |             |    |    | 0.786 |    |   |
| 50BC vs. 70BC | 95      | 104.3           | -9.333     | 16.78       | 3  | 3  | 4     | 56 |   |
|               |         |                 |            |             |    |    | 0.421 |    |   |
| 50BC vs. PSNP | 95      | 100             | -5         | 16.78       | 3  | 3  | 3     | 56 |   |
|               |         |                 |            |             |    |    | 0.617 |    |   |
| 60BC vs. 70BC | 97      | 104.3           | -7.333     | 16.78       | 3  | 3  | 9     | 56 |   |
|               |         |                 |            |             |    |    | 0.252 |    |   |
| 60BC vs. PSNP | 97      | 100             | -3         | 16.78       | 3  | 3  | 8     | 56 |   |
|               |         |                 |            |             |    |    | 0.365 |    |   |
| 70BC vs. PSNP | 104.3   | 100             | 4.333      | 16.78       | 3  | 3  | 1     | 56 |   |
|               |         |                 |            |             |    |    |       |    |   |
| 0.5 uM        |         |                 |            |             |    |    |       |    |   |
| 20BC vs. 30BC | 87.33   | 72.67           | 14.67      | 16.78       | 3  | 3  | 1.236 | 56 |   |
| 20BC vs. 40BC | 87.33   | 73.67           | 13.67      | 16.78       | 3  | 3  | 1.152 | 56 |   |
| 20BC vs. 50BC | 87.33   | 87.33           | 0          | 16.78       | 3  | 3  | 0     | 56 |   |

|               |       |       |        |       |   |   |                |    |
|---------------|-------|-------|--------|-------|---|---|----------------|----|
| 20BC vs. 60BC | 87.33 | 111.3 | -24    | 16.78 | 3 | 3 | 2.022          | 56 |
| 20BC vs. 70BC | 87.33 | 96    | -8.667 | 16.78 | 3 | 3 | 0.730<br>2     | 56 |
| 20BC vs. PSNP | 87.33 | 94.67 | -7.333 | 16.78 | 3 | 3 | 0.617<br>9     | 56 |
| 30BC vs. 40BC | 72.67 | 73.67 | -1     | 16.78 | 3 | 3 | 0.084<br>26    | 56 |
| 30BC vs. 50BC | 72.67 | 87.33 | -14.67 | 16.78 | 3 | 3 | 1.236          | 56 |
| 30BC vs. 60BC | 72.67 | 111.3 | -38.67 | 16.78 | 3 | 3 | 3.258          | 56 |
| 30BC vs. 70BC | 72.67 | 96    | -23.33 | 16.78 | 3 | 3 | 1.966          | 56 |
| 30BC vs. PSNP | 72.67 | 94.67 | -22    | 16.78 | 3 | 3 | 1.854          | 56 |
| 40BC vs. 50BC | 73.67 | 87.33 | -13.67 | 16.78 | 3 | 3 | 1.152          | 56 |
| 40BC vs. 60BC | 73.67 | 111.3 | -37.67 | 16.78 | 3 | 3 | 3.174          | 56 |
| 40BC vs. 70BC | 73.67 | 96    | -22.33 | 16.78 | 3 | 3 | 1.882          | 56 |
| 40BC vs. PSNP | 73.67 | 94.67 | -21    | 16.78 | 3 | 3 | 1.769          | 56 |
| 50BC vs. 60BC | 87.33 | 111.3 | -24    | 16.78 | 3 | 3 | 2.022          | 56 |
| 50BC vs. 70BC | 87.33 | 96    | -8.667 | 16.78 | 3 | 3 | 0.730<br>2     | 56 |
| 50BC vs. PSNP | 87.33 | 94.67 | -7.333 | 16.78 | 3 | 3 | 0.617<br>9     | 56 |
| 60BC vs. 70BC | 111.3 | 96    | 15.33  | 16.78 | 3 | 3 | 1.292          | 56 |
| 60BC vs. PSNP | 111.3 | 94.67 | 16.67  | 16.78 | 3 | 3 | 1.404          | 56 |
| 70BC vs. PSNP | 96    | 94.67 | 1.333  | 16.78 | 3 | 3 | 0.112<br>3     | 56 |
| 0.25 uM       |       |       |        |       |   |   |                |    |
| 20BC vs. 30BC | 88    | 69    | 19     | 16.78 | 3 | 3 | 1.601          | 56 |
| 20BC vs. 40BC | 88    | 79.67 | 8.333  | 16.78 | 3 | 3 | 0.702<br>2     | 56 |
| 20BC vs. 50BC | 88    | 86.67 | 1.333  | 16.78 | 3 | 3 | 0.112<br>3     | 56 |
| 20BC vs. 60BC | 88    | 110.3 | -22.33 | 16.78 | 3 | 3 | 1.882          | 56 |
| 20BC vs. 70BC | 88    | 96    | -8     | 16.78 | 3 | 3 | 0.674<br>1     | 56 |
| 20BC vs. PSNP | 88    | 94.67 | -6.667 | 16.78 | 3 | 3 | 0.561<br>7     | 56 |
| 30BC vs. 40BC | 69    | 79.67 | -10.67 | 16.78 | 3 | 3 | 0.898<br>8     | 56 |
| 30BC vs. 50BC | 69    | 86.67 | -17.67 | 16.78 | 3 | 3 | 1.489          | 56 |
| 30BC vs. 60BC | 69    | 110.3 | -41.33 | 16.78 | 3 | 3 | 3.483          | 56 |
| 30BC vs. 70BC | 69    | 96    | -27    | 16.78 | 3 | 3 | 2.275          | 56 |
| 30BC vs. PSNP | 69    | 94.67 | -25.67 | 16.78 | 3 | 3 | 2.163<br>0.589 | 56 |
| 40BC vs. 50BC | 79.67 | 86.67 | -7     | 16.78 | 3 | 3 | 8              | 56 |
| 40BC vs. 60BC | 79.67 | 110.3 | -30.67 | 16.78 | 3 | 3 | 2.584          | 56 |
| 40BC vs. 70BC | 79.67 | 96    | -16.33 | 16.78 | 3 | 3 | 1.376          | 56 |
| 40BC vs. PSNP | 79.67 | 94.67 | -15    | 16.78 | 3 | 3 | 1.264          | 56 |
| 50BC vs. 60BC | 86.67 | 110.3 | -23.67 | 16.78 | 3 | 3 | 1.994          | 56 |
| 50BC vs. 70BC | 86.67 | 96    | -9.333 | 16.78 | 3 | 3 | 0.786<br>4     | 56 |
| 50BC vs. PSNP | 86.67 | 94.67 | -8     | 16.78 | 3 | 3 | 0.674<br>1     | 56 |
| 60BC vs. 70BC | 110.3 | 96    | 14.33  | 16.78 | 3 | 3 | 1.208          | 56 |
| 60BC vs. PSNP | 110.3 | 94.67 | 15.67  | 16.78 | 3 | 3 | 1.32<br>0.112  | 56 |
| 70BC vs. PSNP | 96    | 94.67 | 1.333  | 16.78 | 3 | 3 | 3              | 56 |
| 0.125 uM      |       |       |        |       |   |   |                |    |
| 20BC vs. 30BC | 80    | 88.33 | -8.333 | 16.78 | 3 | 3 | 0.702<br>2     | 56 |
| 20BC vs. 40BC | 80    | 101   | -21    | 16.78 | 3 | 3 | 1.769          | 56 |
| 20BC vs. 50BC | 80    | 99.33 | -19.33 | 16.78 | 3 | 3 | 1.629          | 56 |
| 20BC vs. 60BC | 80    | 75    | 5      | 16.78 | 3 | 3 | 0.421<br>3     | 56 |
| 20BC vs. 70BC | 80    | 91.67 | -11.67 | 16.78 | 3 | 3 | 0.983          | 56 |
| 20BC vs. PSNP | 80    | 99.67 | -19.67 | 16.78 | 3 | 3 | 1.657          | 56 |
| 30BC vs. 40BC | 88.33 | 101   | -12.67 | 16.78 | 3 | 3 | 1.067          | 56 |
| 30BC vs. 50BC | 88.33 | 99.33 | -11    | 16.78 | 3 | 3 | 0.926<br>8     | 56 |
| 30BC vs. 60BC | 88.33 | 75    | 13.33  | 16.78 | 3 | 3 | 1.123          | 56 |
| 30BC vs. 70BC | 88.33 | 91.67 | -3.333 | 16.78 | 3 | 3 | 0.280<br>9     | 56 |
| 30BC vs. PSNP | 88.33 | 99.67 | -11.33 | 16.78 | 3 | 3 | 0.954<br>9     | 56 |
| 40BC vs. 50BC | 101   | 99.33 | 1.667  | 16.78 | 3 | 3 | 0.140<br>4     | 56 |
| 40BC vs. 60BC | 101   | 75    | 26     | 16.78 | 3 | 3 | 2.191          | 56 |
| 40BC vs. 70BC | 101   | 91.67 | 9.333  | 16.78 | 3 | 3 | 0.786<br>4     | 56 |

|               |       |       |         |       |   |   |       |    |    |
|---------------|-------|-------|---------|-------|---|---|-------|----|----|
| 40BC vs. PSNP | 101   | 99.67 | 1.333   | 16.78 | 3 | 3 | 0.112 | 3  | 56 |
| 50BC vs. 60BC | 99.33 | 75    | 24.33   | 16.78 | 3 | 3 | 2.05  | 3  | 56 |
| 50BC vs. 70BC | 99.33 | 91.67 | 7.667   | 16.78 | 3 | 3 | 0.646 | 3  | 56 |
| 50BC vs. PSNP | 99.33 | 99.67 | -0.3333 | 16.78 | 3 | 3 | 0.028 | 09 | 56 |
| 60BC vs. 70BC | 75    | 91.67 | -16.67  | 16.78 | 3 | 3 | 1.404 | 3  | 56 |
| 60BC vs. PSNP | 75    | 99.67 | -24.67  | 16.78 | 3 | 3 | 2.078 | 3  | 56 |
| 70BC vs. PSNP | 91.67 | 99.67 | -8      | 16.78 | 3 | 3 | 0.674 | 1  | 56 |

**Supplemental Table 5.** Two-way RM ANOVA and Tukey's multiple comparisons results for Figure 5B Study, n=3. All calculations were made in Graphpad Prism.

**Gal-8 Recruitment Statistical Analysis Tabular Results (Figure 6B Study)**

|                            |                      |          |                 |              |  |  |  |  |  |
|----------------------------|----------------------|----------|-----------------|--------------|--|--|--|--|--|
|                            |                      |          |                 |              |  |  |  |  |  |
| <b>Table Analyzed</b>      | Gal 8 Experiment     |          |                 |              |  |  |  |  |  |
|                            |                      |          |                 |              |  |  |  |  |  |
| <b>Two-way RM ANOVA</b>    | Matching: Across row |          |                 |              |  |  |  |  |  |
| <b>Alpha</b>               | 0.05                 |          |                 |              |  |  |  |  |  |
|                            |                      |          |                 |              |  |  |  |  |  |
| <b>Source of Variation</b> | % of total variation | P value  | P value summary | Significant? |  |  |  |  |  |
| <b>Interaction</b>         | 1.033                | < 0.0001 | ****            | Yes          |  |  |  |  |  |
| <b>Composition</b>         | 97.33                | < 0.0001 | ****            | Yes          |  |  |  |  |  |
| <b>Concentration</b>       | 1.2                  | < 0.0001 | ****            | Yes          |  |  |  |  |  |
| <b>Subjects (matching)</b> | 0.353                | 0.0191   | *               | Yes          |  |  |  |  |  |
|                            |                      |          |                 |              |  |  |  |  |  |



| ANOVA table                                                      | SS         | DF               | MS           | F (DFn, DFd)       | P value    |    |   |   |   |
|------------------------------------------------------------------|------------|------------------|--------------|--------------------|------------|----|---|---|---|
| Interaction                                                      | 1428000000 | 4                | 357100000    | F (4, 10) = 29.48  | P < 0.0001 |    |   |   |   |
| Composition                                                      | 1.346E+11  | 4                | 33650000000  | F (4, 10) = 689.3  | P < 0.0001 |    |   |   |   |
| Concentration                                                    | 1660000000 | 1                | 1660000000   | F (1, 10) = 137.0  | P < 0.0001 |    |   |   |   |
| Subjects (matching)                                              | 488200000  | 10               | 48820000     | F (10, 10) = 4.030 | P = 0.0191 |    |   |   |   |
| Residual                                                         | 121100000  | 10               | 12110000     |                    |            |    |   |   |   |
|                                                                  |            |                  |              |                    |            |    |   |   |   |
| Number of missing values                                         | 0          |                  |              |                    |            |    |   |   |   |
| Multiple Comparisons (A)                                         |            |                  |              |                    |            |    |   |   |   |
| Within each column, compare rows (simple effects within columns) |            |                  |              |                    |            |    |   |   |   |
|                                                                  |            |                  |              |                    |            |    |   |   |   |
| Number of families                                               | 2          |                  |              |                    |            |    |   |   |   |
| Number of comparisons per family                                 | 10         |                  |              |                    |            |    |   |   |   |
| Alpha                                                            | 0.05       |                  |              |                    |            |    |   |   |   |
|                                                                  |            |                  |              |                    |            |    |   |   |   |
| Sidak's multiple comparisons test                                | Mean Diff. | 95% CI of diff.  | Significant? | Summary            |            |    |   |   |   |
|                                                                  |            |                  |              |                    |            |    |   |   |   |
| 25 ug/m (5 ug/mL)                                                |            |                  |              |                    |            |    |   |   |   |
| 30BC vs. 40BC                                                    | 43000      | 28834 to 57166   | Yes          | ****               |            |    |   |   |   |
| 30BC vs. 50BC                                                    | 130967     | 116801 to 145133 | Yes          | ****               |            |    |   |   |   |
| 30BC vs. PSNP                                                    | 178597     | 164431 to 192763 | Yes          | ****               |            |    |   |   |   |
| 30BC vs. NT                                                      | 177033     | 162867 to 191199 | Yes          | ****               |            |    |   |   |   |
| 40BC vs. 50BC                                                    | 87967      | 73801 to 102133  | Yes          | ****               |            |    |   |   |   |
| 40BC vs. PSNP                                                    | 135597     | 121431 to 149763 | Yes          | ****               |            |    |   |   |   |
| 40BC vs. NT                                                      | 134033     | 119867 to 148199 | Yes          | ****               |            |    |   |   |   |
| 50BC vs. PSNP                                                    | 47630      | 33464 to 61796   | Yes          | ****               |            |    |   |   |   |
| 50BC vs. NT                                                      | 46067      | 31901 to 60233   | Yes          | ****               |            |    |   |   |   |
| PSNP vs. NT                                                      | -1563      | -15729 to 12603  | No           | ns                 |            |    |   |   |   |
|                                                                  |            |                  |              |                    |            |    |   |   |   |
| 12.5 ug/mL (2.5 ug/mL)                                           |            |                  |              |                    |            |    |   |   |   |
| 30BC vs. 40BC                                                    | 54667      | 40501 to 68833   | Yes          | ****               |            |    |   |   |   |
| 30BC vs. 50BC                                                    | 132067     | 117901 to 146233 | Yes          | ****               |            |    |   |   |   |
| 30BC vs. PSNP                                                    | 153993     | 139827 to 168159 | Yes          | ****               |            |    |   |   |   |
| 30BC vs. NT                                                      | 156587     | 142421 to 170753 | Yes          | ****               |            |    |   |   |   |
| 40BC vs. 50BC                                                    | 77400      | 63234 to 91566   | Yes          | ****               |            |    |   |   |   |
| 40BC vs. PSNP                                                    | 99327      | 85161 to 113493  | Yes          | ****               |            |    |   |   |   |
| 40BC vs. NT                                                      | 101920     | 87754 to 116086  | Yes          | ****               |            |    |   |   |   |
| 50BC vs. PSNP                                                    | 21927      | 7761 to 36093    | Yes          | ***                |            |    |   |   |   |
| 50BC vs. NT                                                      | 24520      | 10354 to 38686   | Yes          | ***                |            |    |   |   |   |
| PSNP vs. NT                                                      | 2593       | -11573 to 16759  | No           | ns                 |            |    |   |   |   |
|                                                                  |            |                  |              |                    |            |    |   |   |   |
|                                                                  |            |                  |              |                    |            |    |   |   |   |
| Test details                                                     | Mean 1     | Mean 2           | Mean Diff.   | SE of diff.        | N1         | N2 | t | D | F |

|                                                              |            |                 |              |             |    |    |            |    |   |
|--------------------------------------------------------------|------------|-----------------|--------------|-------------|----|----|------------|----|---|
|                                                              |            |                 |              |             |    |    |            |    |   |
| <b>25 ug/m (5 ug/mL)</b>                                     |            |                 |              |             |    |    |            |    |   |
| 30BC vs. 40BC                                                | 181667     | 138667          | 43000        | 4507        | 3  | 3  | 9.541      | 20 |   |
| 30BC vs. 50BC                                                | 181667     | 50700           | 130967       | 4507        | 3  | 3  | 29.06      | 20 |   |
| 30BC vs. PSNP                                                | 181667     | 3070            | 178597       | 4507        | 3  | 3  | 39.63      | 20 |   |
| 30BC vs. NT                                                  | 181667     | 4633            | 177033       | 4507        | 3  | 3  | 39.28      | 20 |   |
| 40BC vs. 50BC                                                | 138667     | 50700           | 87967        | 4507        | 3  | 3  | 19.52      | 20 |   |
| 40BC vs. PSNP                                                | 138667     | 3070            | 135597       | 4507        | 3  | 3  | 30.09      | 20 |   |
| 40BC vs. NT                                                  | 138667     | 4633            | 134033       | 4507        | 3  | 3  | 29.74      | 20 |   |
| 50BC vs. PSNP                                                | 50700      | 3070            | 47630        | 4507        | 3  | 3  | 10.57      | 20 |   |
| 50BC vs. NT                                                  | 50700      | 4633            | 46067        | 4507        | 3  | 3  | 10.22      | 20 |   |
| PSNP vs. NT                                                  | 3070       | 4633            | -1563        | 4507        | 3  | 3  | 0.346<br>9 | 20 |   |
|                                                              |            |                 |              |             |    |    |            |    |   |
| <b>12.5 ug.mL (2.5 ug/mL)</b>                                |            |                 |              |             |    |    |            |    |   |
| 30BC vs. 40BC                                                | 160333     | 105667          | 54667        | 4507        | 3  | 3  | 12.13      | 20 |   |
| 30BC vs. 50BC                                                | 160333     | 28267           | 132067       | 4507        | 3  | 3  | 29.3       | 20 |   |
| 30BC vs. PSNP                                                | 160333     | 6340            | 153993       | 4507        | 3  | 3  | 34.17      | 20 |   |
| 30BC vs. NT                                                  | 160333     | 3747            | 156587       | 4507        | 3  | 3  | 34.75      | 20 |   |
| 40BC vs. 50BC                                                | 105667     | 28267           | 77400        | 4507        | 3  | 3  | 17.17      | 20 |   |
| 40BC vs. PSNP                                                | 105667     | 6340            | 99327        | 4507        | 3  | 3  | 22.04      | 20 |   |
| 40BC vs. NT                                                  | 105667     | 3747            | 101920       | 4507        | 3  | 3  | 22.62      | 20 |   |
| 50BC vs. PSNP                                                | 28267      | 6340            | 21927        | 4507        | 3  | 3  | 4.865      | 20 |   |
| 50BC vs. NT                                                  | 28267      | 3747            | 24520        | 4507        | 3  | 3  | 5.441      | 20 |   |
| PSNP vs. NT                                                  | 6340       | 3747            | 2593         | 4507        | 3  | 3  | 0.575<br>4 | 20 |   |
| <b>Multiple Comparisons (B)</b>                              |            |                 |              |             |    |    |            |    |   |
| Compare each cell mean with the other cell mean in that row. |            |                 |              |             |    |    |            |    |   |
| Number of families                                           | 1          |                 |              |             |    |    |            |    |   |
| Number of comparisons per family                             | 5          |                 |              |             |    |    |            |    |   |
| Alpha                                                        | 0.05       |                 |              |             |    |    |            |    |   |
| Sidak's multiple comparisons test                            | Mean Diff. | 95% CI of diff. | Significant? | Summary     |    |    |            |    |   |
| <b>25 ug/m (5 ug/mL) - 12.5 ug.mL (2.5 ug/mL)</b>            |            |                 |              |             |    |    |            |    |   |
| 30BC                                                         | 21333      | 12361 to 30306  | Yes          | ***         |    |    |            |    |   |
| 40BC                                                         | 33000      | 24027 to 41973  | Yes          | ****        |    |    |            |    |   |
| 50BC                                                         | 22433      | 13461 to 31406  | Yes          | ****        |    |    |            |    |   |
| PSNP                                                         | -3270      | -12243 to 5703  | No           | ns          |    |    |            |    |   |
| NT                                                           | 886.7      | -8086 to 9859   | No           | ns          |    |    |            |    |   |
| Test details                                                 | Mean 1     | Mean 2          | Mean Diff.   | SE of diff. | N1 | N2 | t          | D  | F |
| <b>25 ug/m (5 ug/mL) - 12.5 ug.mL (2.5 ug/mL)</b>            |            |                 |              |             |    |    |            |    |   |

|      |        |        |       |      |   |   |       |    |
|------|--------|--------|-------|------|---|---|-------|----|
| 30BC | 181667 | 160333 | 21333 | 2842 | 3 | 3 | 7.507 | 10 |
| 40BC | 138667 | 105667 | 33000 | 2842 | 3 | 3 | 11.61 | 10 |
| 50BC | 50700  | 28267  | 22433 | 2842 | 3 | 3 | 7.894 | 10 |
| PSNP | 3070   | 6340   | -3270 | 2842 | 3 | 3 | 1.151 | 10 |
| NT   | 4633   | 3747   | 886.7 | 2842 | 3 | 3 | 0.312 | 10 |

**Supplemental Table 6.** Two-way RM ANOVA and Sidak's multiple comparisons results for Figure 6 Study, n=3. All calculations were made in Graphpad Prism.
